# Supplementary material for: A Transcontinental Challenge — A Test of DNA Barcode Performance for 1,541 Species of Canadian Noctuoidea (Lepidoptera)
Source: PLoS One. 2014 Mar 25;9(3):e92797. doi: 10.1371/journal.pone.0092797 (PMC3965468; doi:10.1371/journal.pone.0092797)
Supplement: Data set S2 — List of Canadian species of Noctuoidea and the number of barcode records for each taxon. Species with specimen barcoded from out-of-Canada are marked in green. Missing species (14 taxa) are in red. (XLS) [file pone.0092797.s011.xls]

## Sheet: DatasetSI2
#	Family	Subfamily	Tribe	Species Auth	Species	#Specimens barcoded
1	Notodontidae	Heterocampinae		Heterocampa biundata Walker, 1855	Heterocampa biundata	Heterocampa biundata[21 individuals]
2	Notodontidae	Heterocampinae		Heterocampa guttivitta (Walker, 1855)	Heterocampa guttivitta	Heterocampa guttivitta[70 individuals]
3	Notodontidae	Heterocampinae		Heterocampa obliqua Packard, 1864	Heterocampa obliqua	Heterocampa obliqua[1 individuals]
4	Notodontidae	Heterocampinae		Heterocampa subrotata Harvey, 1874	Heterocampa subrotata	Heterocampa subrotata[52 individuals]
5	Notodontidae	Heterocampinae		Heterocampa umbrata Walker, 1855	Heterocampa umbrata	Heterocampa umbrata[14 individuals]
6	Notodontidae	Heterocampinae		Hyparpax aurora (J.E. Smith, 1797)	Hyparpax aurora	Hyparpax aurora[7 individuals]
7	Notodontidae	Heterocampinae		Lochmaeus bilineata (Packard, 1864)	Lochmaeus bilineata	Lochmaeus bilineata[17 individuals]
8	Notodontidae	Heterocampinae		Lochmaeus manteo Doubleday, 1841	Lochmaeus manteo	Lochmaeus manteo[13 individuals]
9	Notodontidae	Heterocampinae		Macrurocampa marthesia (Cramer, 1780)	Macrurocampa marthesia	Macrurocampa marthesia[6 individuals]
10	Notodontidae	Heterocampinae		Misogada unicolor (Packard, 1864)	Misogada unicolor	Misogada unicolor[3 individuals]
11	Notodontidae	Heterocampinae		Oligocentria lignicolor (Walker, 1855)	Oligocentria lignicolor	Oligocentria lignicolor[26 individuals]
12	Notodontidae	Heterocampinae		Oligocentria pallida (Strecker, 1899)	Oligocentria pallida	Oligocentria pallida[9 individuals]
13	Notodontidae	Heterocampinae		Oligocentria semirufescens (Walker, 1865)	Oligocentria semirufescens	Oligocentria semirufescens[38 individuals]
14	Notodontidae	Heterocampinae		Schizura apicalis (Grote & Robinson, 1866)	Schizura apicalis	Schizura apicalis[2 individuals]
15	Notodontidae	Heterocampinae		Schizura badia (Packard, 1864)	Schizura badia	Schizura badia[8 individuals]
16	Notodontidae	Heterocampinae		Schizura concinna (J.E. Smith, 1797)	Schizura concinna	Schizura concinna[5 individuals]
17	Notodontidae	Heterocampinae		Schizura ipomoeae Doubleday, 1841	Schizura ipomoeae	Schizura ipomoeae[29 individuals]
18	Notodontidae	Heterocampinae		Schizura leptinoides (Grote, 1864)	Schizura leptinoides	Schizura leptinoides[22 individuals]
19	Notodontidae	Heterocampinae		Schizura unicornis (J.E. Smith, 1797)	Schizura unicornis	Schizura unicornis[94 individuals]
20	Notodontidae	Notodontinae	Dicranurini	Cerura scitiscripta Walker, 1865	Cerura scitiscripta	Cerura scitiscripta[5 individuals]
21	Notodontidae	Notodontinae	Dicranurini	Furcula borealis (Guérin-Méneville, 1832)	Furcula borealis	Furcula borealis[21 individuals]
22	Notodontidae	Notodontinae	Dicranurini	Furcula cinerea (Walker, 1865)	Furcula cinerea	Furcula cinerea[17 individuals]
23	Notodontidae	Notodontinae	Dicranurini	Furcula modesta (Hudson, 1891)	Furcula modesta	Furcula modesta[30 individuals]
24	Notodontidae	Notodontinae	Dicranurini	Furcula occidentalis (Lintner, 1878)	Furcula occidentalis	Furcula occidentalis[47 individuals]
25	Notodontidae	Notodontinae	Dicranurini	Furcula scolopendrina (Boisduval, 1869)	Furcula scolopendrina	Furcula scolopendrina[47 individuals]
26	Notodontidae	Notodontinae	Dicranurini	Gluphisia avimacula Hudson, 1891	Gluphisia avimacula	Gluphisia avimacula[14 individuals]
27	Notodontidae	Notodontinae	Dicranurini	Gluphisia lintneri (Grote, 1877)	Gluphisia lintneri	Gluphisia lintneri[20 individuals]
28	Notodontidae	Notodontinae	Dicranurini	Gluphisia septentrionis Walker, 1855	Gluphisia septentrionis	Gluphisia septentrionis[183 individuals]
29	Notodontidae	Notodontinae	Dicranurini	Gluphisia severa Hy. Edwards, 1886	Gluphisia severa	Gluphisia severa[8 individuals]
30	Notodontidae	Notodontinae	Notodontini	Hyperaeschra georgica (Herrich-Schäffer, 1855)	Hyperaeschra georgica	Hyperaeschra georgica[2 individuals]
31	Notodontidae	Notodontinae	Notodontini	Nerice bidentata Walker, 1855	Nerice bidentata	Nerice bidentata[18 individuals]
32	Notodontidae	Notodontinae	Notodontini	Notodonta pacifica Behr, 1892	Notodonta pacifica	Notodonta pacifica[2 individuals]
33	Notodontidae	Notodontinae	Notodontini	Notodonta scitipennis Walker, 1862	Notodonta scitipennis	Notodonta scitipennis[18 individuals]
34	Notodontidae	Notodontinae	Notodontini	Notodonta torva (Hübner, 1803)	Notodonta torva	Notodonta torva[24 individuals]
35	Notodontidae	Notodontinae	Notodontini	Odontosia elegans (Strecker, 1885)	Odontosia elegans	Odontosia elegans[23 individuals]
36	Notodontidae	Notodontinae	Notodontini	Pheosia rimosa Packard, 1864	Pheosia rimosa	Pheosia rimosa[93 individuals]
37	Notodontidae	Nystaleinae		Dasylophia anguina (J.E. Smith, 1797)	Dasylophia anguina	Dasylophia anguina[21 individuals]
38	Notodontidae	Nystaleinae		Dasylophia thyatiroides (Walker, 1862)	Dasylophia thyatiroides	Dasylophia thyatiroides[8 individuals]
39	Notodontidae	Nystaleinae		Symmerista albifrons (J.E. Smith, 1797)	Symmerista albifrons	Symmerista albifrons[9 individuals]
40	Notodontidae	Nystaleinae		Symmerista canicosta Franclemont, 1946	Symmerista canicosta	Symmerista canicosta[17 individuals]
41	Notodontidae	Nystaleinae		Symmerista leucitys Franclemont, 1946	Symmerista leucitys	Symmerista leucitys[44 individuals]
42	Notodontidae	Phalerinae		Datana angusii Grote & Robinson, 1866	Datana angusii	Datana angusii[3 individuals]
43	Notodontidae	Phalerinae		Datana contracta Walker, 1855	Datana contracta	Datana contracta[1 individuals]
44	Notodontidae	Phalerinae		Datana drexelii Hy. Edwards, 1884	Datana drexelii	Datana drexelii[2 individuals]
45	Notodontidae	Phalerinae		Datana integerrima Grote & Robinson, 1866	Datana integerrima	Datana integerrima[10 individuals]
46	Notodontidae	Phalerinae		Datana ministra (Drury, 1773)	Datana ministra	Datana ministra[22 individuals]
47	Notodontidae	Phalerinae		Datana perspicua Grote & Robinson, 1865	Datana perspicua	Datana perspicua[4 individuals]
48	Notodontidae	Phalerinae		Ellida caniplaga (Walker, 1856)	Ellida caniplaga	Ellida caniplaga[27 individuals]
49	Notodontidae	Phalerinae		Nadata gibbosa (J.E. Smith, 1797)	Nadata gibbosa	Nadata gibbosa[148 individuals]
50	Notodontidae	Phalerinae		Peridea angulosa (J.E. Smith, 1797)	Peridea angulosa	Peridea angulosa[7 individuals]
51	Notodontidae	Phalerinae		Peridea basitriens (Walker, 1855)	Peridea basitriens	Peridea basitriens[13 individuals]
52	Notodontidae	Phalerinae		Peridea ferruginea (Packard, 1864)	Peridea ferruginea	Peridea ferruginea[48 individuals]
53	Notodontidae	Pygaerinae		Clostera albosigma Fitch, 1856	Clostera albosigma	Clostera albosigma[80 individuals]
54	Notodontidae	Pygaerinae		Clostera apicalis (Walker, 1855)	Clostera apicalis	Clostera apicalis[59 individuals]
55	Notodontidae	Pygaerinae		Clostera brucei (Hy. Edwards, 1885)	Clostera brucei	Clostera brucei[29 individuals]
56	Notodontidae	Pygaerinae		Clostera inclusa (Hübner, [1831])	Clostera inclusa	Clostera inclusa[10 individuals]
57	Notodontidae	Pygaerinae		Clostera strigosa (Grote, 1882)	Clostera strigosa	Clostera strigosa[12 individuals]
58	Erebidae	Arctiinae	Arctiini	Acerbia alpina (Quensel, 1802)	Acerbia alpina	Acerbia alpina[1 individuals]
59	Erebidae	Arctiinae	Arctiini	Apantesis nais (Drury, 1773)	Apantesis nais	Apantesis nais[3 individuals]
60	Erebidae	Arctiinae	Arctiini	Apantesis phalerata (Harris, 1841)	Apantesis phalerata	Apantesis phalerata[10 individuals]
61	Erebidae	Arctiinae	Arctiini	Arctia brachyptera Troubridge & Lafontaine, 2000	Arctia brachyptera	Arctia brachyptera[2 individuals]
62	Erebidae	Arctiinae	Arctiini	Arctia caja (Linnaeus, 1758)	Arctia caja	Arctia caja[13 individuals]
63	Erebidae	Arctiinae	Arctiini	Arctia opulenta (Hy. Edwards, 1881)	Arctia opulenta	Arctia opulenta[1 individuals]
64	Erebidae	Arctiinae	Arctiini	Cisseps fulvicollis (Hübner, [1818])	Cisseps fulvicollis	Cisseps fulvicollis[79 individuals]
65	Erebidae	Arctiinae	Arctiini	Ctenucha virginica (Esper, 1794)	Ctenucha virginica	Ctenucha virginica[64 individuals]
66	Erebidae	Arctiinae	Arctiini	Cycnia oregonensis (Stretch, 1873)	Cycnia oregonensis	Cycnia oregonensis[32 individuals]
67	Erebidae	Arctiinae	Arctiini	Cycnia tenera Hübner, 1818	Cycnia tenera	Cycnia tenera[24 individuals]
68	Erebidae	Arctiinae	Arctiini	Dodia albertae Dyar, 1901	Dodia albertae	Dodia albertae[12 individuals]
69	Erebidae	Arctiinae	Arctiini	Dodia kononenkoi Tshistjakov & Lafontaine, 1984	Dodia kononenkoi	Dodia kononenkoi[3 individuals]
70	Erebidae	Arctiinae	Arctiini	Dodia tarandus Macaulay & Schmidt, 2009	Dodia tarandus	Dodia tarandus[2 individuals]
71	Erebidae	Arctiinae	Arctiini	Dodia verticalis Lafontaine & Troubridge, 2000	Dodia verticalis	Dodia verticalis[3 individuals]
72	Erebidae	Arctiinae	Arctiini	Estigmene acrea (Drury, 1773)	Estigmene acrea	Estigmene acrea[27 individuals]
73	Erebidae	Arctiinae	Arctiini	Euchaetes egle (Drury, 1773)	Euchaetes egle	Euchaetes egle[11 individuals]
74	Erebidae	Arctiinae	Arctiini	Gnophaela vermiculata (Grote, 1864)	Gnophaela vermiculata	Gnophaela vermiculata[12 individuals]
75	Erebidae	Arctiinae	Arctiini	Grammia anna (Grote, 1864)	Grammia anna	Grammia anna[2 individuals]
76	Erebidae	Arctiinae	Arctiini	Grammia arge (Drury, 1773)	Grammia arge	Grammia arge[14 individuals]
77	Erebidae	Arctiinae	Arctiini	Grammia blakei (Grote, 1865)	Grammia blakei	Grammia blakei[5 individuals]
78	Erebidae	Arctiinae	Arctiini	Grammia complicata (Walker, 1865)	Grammia complicata	Grammia complicata[3 individuals]
79	Erebidae	Arctiinae	Arctiini	Grammia doris (Boisduval, 1869)	Grammia doris	Grammia doris[3 individuals]
80	Erebidae	Arctiinae	Arctiini	Grammia elongata (Stretch, 1885)	Grammia elongata	Grammia elongata[5 individuals]
81	Erebidae	Arctiinae	Arctiini	Grammia figurata (Drury, 1773)	Grammia figurata	Grammia figurata[5 individuals]
82	Erebidae	Arctiinae	Arctiini	Grammia franconia (H. Edwards, 1888)	Grammia franconia	Grammia franconia[5 individuals]
83	Erebidae	Arctiinae	Arctiini	Grammia margo Schmidt, 2009	Grammia margo	Grammia margo[4 individuals]
84	Erebidae	Arctiinae	Arctiini	Grammia nevadensis (Grote & Robinson, 1866)	Grammia nevadensis	Grammia nevadensis[144 individuals]
85	Erebidae	Arctiinae	Arctiini	Grammia ornata (Packard, 1864)	Grammia ornata	Grammia ornata[25 individuals]
86	Erebidae	Arctiinae	Arctiini	Grammia parthenice (Kirby, 1837)	Grammia parthenice	Grammia parthenice[30 individuals]
87	Erebidae	Arctiinae	Arctiini	Grammia philipiana Ferguson, 1985	Grammia philipiana	Grammia philipiana
88	Erebidae	Arctiinae	Arctiini	Grammia phyllira (Drury, 1773)	Grammia phyllira	Grammia phyllira[5 individuals]
89	Erebidae	Arctiinae	Arctiini	Grammia quenseli (Paykull, 1793)	Grammia quenseli	Grammia quenseli[17 individuals]
90	Erebidae	Arctiinae	Arctiini	Grammia speciosa (Moeschler, 1864)	Grammia speciosa	Grammia speciosa[3 individuals]
91	Erebidae	Arctiinae	Arctiini	Grammia virgo (Linnaeus, 1758)	Grammia virgo	Grammia virgo[38 individuals]
92	Erebidae	Arctiinae	Arctiini	Grammia virguncula (Kirby, 1837)	Grammia virguncula	Grammia virguncula[77 individuals]
93	Erebidae	Arctiinae	Arctiini	Grammia williamsii (Dodge, 1871)	Grammia williamsii	Grammia williamsii[37 individuals]
94	Erebidae	Arctiinae	Arctiini	Grammia yukona Schmidt, 2009	Grammia yukona	Grammia yukona[2 individuals]
95	Erebidae	Arctiinae	Arctiini	Halysidota harrisii (Walsh, 1864)	Halysidota harrisii	Halysidota harrisii[14 individuals]
96	Erebidae	Arctiinae	Arctiini	Halysidota tessellaris (J.E. Smith, 1797)	Halysidota tessellaris	Halysidota tessellaris[70 individuals]
97	Erebidae	Arctiinae	Arctiini	Haploa clymene (Brown, 1776)	Haploa clymene	Haploa clymene[15 individuals]
98	Erebidae	Arctiinae	Arctiini	Haploa confusa (Lyman, 1887)	Haploa confusa	Haploa confusa[28 individuals]
99	Erebidae	Arctiinae	Arctiini	Haploa contigua (Walker, 1855)	Haploa contigua	Haploa contigua[2 individuals]
100	Erebidae	Arctiinae	Arctiini	Haploa lecontei (Guérin-Méneville, 1832)	Haploa lecontei	Haploa lecontei[47 individuals]
101	Erebidae	Arctiinae	Arctiini	Haploa reversa (Stretch, 1885)	Haploa reversa	Haploa reversa[3 individuals]
102	Erebidae	Arctiinae	Arctiini	Holarctia obliterata (Stretch, 1885)	Holarctia obliterata	Holarctia obliterata[4 individuals]
103	Erebidae	Arctiinae	Arctiini	Holoarctia sordida (McDunnough, 1921)	Holoarctia sordida	Holoarctia sordida[3 individuals]
104	Erebidae	Arctiinae	Arctiini	Hypercompe permaculata (Packard, 1872)	Hypercompe permaculata	Hypercompe permaculata[4 individuals]
105	Erebidae	Arctiinae	Arctiini	Hypercompe scribonia (Stoll, 1790)	Hypercompe scribonia	Hypercompe scribonia[3 individuals]
106	Erebidae	Arctiinae	Arctiini	Hyphantria cunea (Drury, 1773)	Hyphantria cunea	Hyphantria cunea[117 individuals]
107	Erebidae	Arctiinae	Arctiini	Leptarctia californiae (Walker, 1855)	Leptarctia californiae	Leptarctia californiae[4 individuals]
108	Erebidae	Arctiinae	Arctiini	Lophocampa argentata (Packard, 1864)	Lophocampa argentata	Lophocampa argentata[17 individuals]
109	Erebidae	Arctiinae	Arctiini	Lophocampa caryae Harris, 1841	Lophocampa caryae	Lophocampa caryae[15 individuals]
110	Erebidae	Arctiinae	Arctiini	Lophocampa maculata Harris, 1841	Lophocampa maculata	Lophocampa maculata[114 individuals]
111	Erebidae	Arctiinae	Arctiini	Lophocampa roseata (Walker, 1866)	Lophocampa roseata	Lophocampa roseata[10 individuals]
112	Erebidae	Arctiinae	Arctiini	Neoarctia beanii (Neumoegen, 1891)	Neoarctia beanii	Neoarctia beanii[5 individuals]
113	Erebidae	Arctiinae	Arctiini	Neoarctia brucei (Hy. Edwards, 1888)	Neoarctia brucei	Neoarctia brucei[1 individuals]
114	Erebidae	Arctiinae	Arctiini	Neoarctia lafontainei Ferguson, 1985	Neoarctia lafontainei	Neoarctia lafontainei[1 individuals]
115	Erebidae	Arctiinae	Arctiini	Pararctia lapponica (Thunberg, 1791)	Pararctia lapponica	Pararctia lapponica[4 individuals]
116	Erebidae	Arctiinae	Arctiini	Pararctia subnebulosa (Dyar, 1899)	Pararctia subnebulosa	Pararctia subnebulosa[1 individuals]
117	Erebidae	Arctiinae	Arctiini	Pararctia yarrowii (Stretch, 1873)	Pararctia yarrowii	Pararctia yarrowii[7 individuals]
118	Erebidae	Arctiinae	Arctiini	Parasemia plantaginis (Linnaeus, 1758)	Parasemia plantaginis	Parasemia plantaginis[14 individuals]
119	Erebidae	Arctiinae	Arctiini	Phragmatobia assimilans Walker, 1855	Phragmatobia assimilans	Phragmatobia assimilans[25 individuals]
120	Erebidae	Arctiinae	Arctiini	Phragmatobia fuliginosa (Linnaeus, 1758)	Phragmatobia fuliginosa	Phragmatobia fuliginosa[40 individuals]
121	Erebidae	Arctiinae	Arctiini	Phragmatobia lineata Newman & Donahue, 1966	Phragmatobia lineata	Phragmatobia lineata[1 individuals]
122	Erebidae	Arctiinae	Arctiini	Platarctia parthenos (Harris, 1850)	Platarctia parthenos	Platarctia parthenos[34 individuals]
123	Erebidae	Arctiinae	Arctiini	Platyprepia virginalis (Boisduval, 1852)	Platyprepia virginalis	Platyprepia virginalis[1 individuals]
124	Erebidae	Arctiinae	Arctiini	Pygarctia spraguei (Grote, 1875)	Pygarctia spraguei	Pygarctia spraguei[3 individuals]
125	Erebidae	Arctiinae	Arctiini	Pyrrharctia isabella (J.E. Smith, 1797)	Pyrrharctia isabella	Pyrrharctia isabella[59 individuals]
126	Erebidae	Arctiinae	Arctiini	Spilosoma congrua Walker, 1855	Spilosoma congrua	Spilosoma congrua[35 individuals]
127	Erebidae	Arctiinae	Arctiini	Spilosoma danbyi (Neumoegen & Dyar, 1893)	Spilosoma danbyi	Spilosoma danbyi[1 individuals]
128	Erebidae	Arctiinae	Arctiini	Spilosoma dubia (Walker, 1855)	Spilosoma dubia	Spilosoma dubia[5 individuals]
129	Erebidae	Arctiinae	Arctiini	Spilosoma latipennis Stretch, 1872	Spilosoma latipennis	Spilosoma latipennis[16 individuals]
130	Erebidae	Arctiinae	Arctiini	Spilosoma pteridis Hy. Edwards, 1874	Spilosoma pteridis	Spilosoma pteridis[6 individuals]
131	Erebidae	Arctiinae	Arctiini	Spilosoma vagans (Boisduval, 1852)	Spilosoma vagans	Spilosoma vagans[9 individuals]
132	Erebidae	Arctiinae	Arctiini	Spilosoma virginica (Fabricius, 1798)	Spilosoma virginica	Spilosoma virginica[103 individuals]
133	Erebidae	Arctiinae	Arctiini	Tyria jacobaeae (Linnaeus, 1758)	Tyria jacobaeae	Tyria jacobaeae[3 individuals]
134	Erebidae	Arctiinae	Arctiini	Virbia aurantiaca (Hübner, [1831])	Virbia aurantiaca	Virbia aurantiaca[21 individuals]
135	Erebidae	Arctiinae	Arctiini	Virbia ferruginosa (Walker, 1854)	Virbia ferruginosa	Virbia ferruginosa[91 individuals]
136	Erebidae	Arctiinae	Arctiini	Virbia immaculata (Reakirt, 1864)	Virbia immaculata	Virbia immaculata[9 individuals]
137	Erebidae	Arctiinae	Arctiini	Virbia laeta (Guérin-Méneville, 1844)	Virbia laeta	Virbia laeta[15 individuals]
138	Erebidae	Arctiinae	Arctiini	Virbia lamae (Freeman, 1941)	Virbia lamae	Virbia lamae[1 individuals]
139	Erebidae	Arctiinae	Arctiini	Virbia opella (Grote, 1863)	Virbia opella	Virbia opella[7 individuals]
140	Erebidae	Arctiinae	Lithosiini	Acsala anomala Benjamin, 1935	Acsala anomala	Acsala anomala[8 individuals]
141	Erebidae	Arctiinae	Lithosiini	Bruceia pulverina Neumoegen, 1893	Bruceia pulverina	Bruceia pulverina[6 individuals]
142	Erebidae	Arctiinae	Lithosiini	Cisthene plumbea Stretch, 1885	Cisthene plumbea	Cisthene plumbea[19 individuals]
143	Erebidae	Arctiinae	Lithosiini	Clemensia albata Packard, 1864	Clemensia albata	Clemensia albata[66 individuals]
144	Erebidae	Arctiinae	Lithosiini	Crambidia casta (Packard, 1869)	Crambidia casta	Crambidia casta[18 individuals]
145	Erebidae	Arctiinae	Lithosiini	Crambidia cephalica (Grote & Robinson, 1870)	Crambidia cephalica	Crambidia cephalica[1 individuals]
146	Erebidae	Arctiinae	Lithosiini	Crambidia pallida Packard, 1864	Crambidia pallida	Crambidia pallida[38 individuals]
147	Erebidae	Arctiinae	Lithosiini	Crambidia pura Barnes & McDunnough, 1913	Crambidia pura	Crambidia pura[1 individuals]
148	Erebidae	Arctiinae	Lithosiini	Eilema bicolor (Grote, 1864)	Eilema bicolor	Eilema bicolor[146 individuals]
149	Erebidae	Arctiinae	Lithosiini	Hypoprepia fucosa Hübner, [1831]	Hypoprepia fucosa	Hypoprepia fucosa[56 individuals]
150	Erebidae	Arctiinae	Lithosiini	Hypoprepia miniata (Kirby, 1837)	Hypoprepia miniata	Hypoprepia miniata[34 individuals]
151	Erebidae	Arctiinae	Lithosiini	Lycomorpha pholus (Drury, 1773)	Lycomorpha pholus	Lycomorpha pholus[6 individuals]
152	Erebidae	Boletobiinae		Hyperstrotia pervertens (Barnes & McDunnough, 1918)	Hyperstrotia pervertens	Hyperstrotia pervertens[29 individuals]
153	Erebidae	Boletobiinae		Hyperstrotia secta (Grote, 1879)	Hyperstrotia secta	Hyperstrotia secta[11 individuals]
154	Erebidae	Boletobiinae		Hyperstrotia villificans (Barnes & McDunnough, 1918)	Hyperstrotia villificans	Hyperstrotia villificans[4 individuals]
155	Erebidae	Boletobiinae		Isogona tenuis (Grote, 1872)	Isogona tenuis	Isogona tenuis[29 individuals]
156	Erebidae	Boletobiinae		Metalectra discalis (Grote, 1876)	Metalectra discalis	Metalectra discalis[19 individuals]
157	Erebidae	Boletobiinae		Metalectra quadrisignata (Walker, [1858])	Metalectra quadrisignata	Metalectra quadrisignata[7 individuals]
158	Erebidae	Boletobiinae		Mycterophora inexplicata (Walker, [1863])	Mycterophora inexplicata	Mycterophora inexplicata[4 individuals]
159	Erebidae	Boletobiinae		Mycterophora longipalpata Hulst, 1896	Mycterophora longipalpata	Mycterophora longipalpata[10 individuals]
160	Erebidae	Boletobiinae		Parascotia fuliginaria (Linnaeus, 1761)	Parascotia fuliginaria	Parascotia fuliginaria[18 individuals]
161	Erebidae	Boletobiinae		Phytometra ernestinana (Blanchard, 1840)	Phytometra ernestinana	Phytometra ernestinana[8 individuals]
162	Erebidae	Boletobiinae		Phytometra rhodarialis (Walker, 1859)	Phytometra rhodarialis	Phytometra rhodarialis[17 individuals]
163	Erebidae	Boletobiinae		Spargaloma sexpunctata Grote, 1873	Spargaloma sexpunctata	Spargaloma sexpunctata[18 individuals]
164	Erebidae	Calpinae	Calpini	Calyptra canadensis (Bethune, 1865)	Calyptra canadensis	Calyptra canadensis[7 individuals]
165	Erebidae	Calpinae	Calpini	Plusiodonta compressipalpis Guenée, 1852	Plusiodonta compressipalpis	Plusiodonta compressipalpis[2 individuals]
166	Erebidae	Calpinae	Ophiderini	Eudocima apta (Walker, [1858])	Eudocima apta	Eudocima apta[9 individuals]
167	Erebidae	Erebinae	Catocalini	Catocala aholibah Strecker, 1874	Catocala aholibah	Catocala aholibah[8 individuals]
168	Erebidae	Erebinae	Catocalini	Catocala amatrix (Hübner, [1813])	Catocala amatrix	Catocala amatrix[2 individuals]
169	Erebidae	Erebinae	Catocalini	Catocala amica (Hübner, 1818)	Catocala amica	Catocala amica[22 individuals]
170	Erebidae	Erebinae	Catocalini	Catocala antinympha (Hübner, 1823)	Catocala antinympha	Catocala antinympha[4 individuals]
171	Erebidae	Erebinae	Catocalini	Catocala badia coelebs Grote, 1874	Catocala badia	Catocala badia[8 individuals]
172	Erebidae	Erebinae	Catocalini	Catocala blandula Hulst, 1884	Catocala blandula	Catocala blandula[12 individuals]
173	Erebidae	Erebinae	Catocalini	Catocala briseis Edwards, 1864	Catocala briseis	Catocala briseis[14 individuals]
174	Erebidae	Erebinae	Catocalini	Catocala californica Edwards, 1864	Catocala californica	Catocala californica[2 individuals]
175	Erebidae	Erebinae	Catocalini	Catocala cara Guenée, 1852	Catocala cara	Catocala cara[5 individuals]
176	Erebidae	Erebinae	Catocalini	Catocala cerogama Guenée, 1852	Catocala cerogama	Catocala cerogama[17 individuals]
177	Erebidae	Erebinae	Catocalini	Catocala clintonii Grote, 1864	Catocala clintonii	Catocala clintonii[15 individuals]
178	Erebidae	Erebinae	Catocalini	Catocala coccinata Grote, 1872	Catocala coccinata	Catocala coccinata[12 individuals]
179	Erebidae	Erebinae	Catocalini	Catocala concumbens Walker, [1858]	Catocala concumbens	Catocala concumbens[10 individuals]
180	Erebidae	Erebinae	Catocalini	Catocala connubialis Guenée, 1852	Catocala connubialis	Catocala connubialis[14 individuals]
181	Erebidae	Erebinae	Catocalini	Catocala crataegi Saunders, 1876	Catocala crataegi	Catocala crataegi[19 individuals]
182	Erebidae	Erebinae	Catocalini	Catocala dejecta Strecker, 1880	Catocala dejecta	Catocala dejecta[10 individuals]
183	Erebidae	Erebinae	Catocalini	Catocala epione (Drury, 1773)	Catocala epione	Catocala epione[20 individuals]
184	Erebidae	Erebinae	Catocalini	Catocala faustina Strecker, 1873	Catocala faustina	Catocala faustina[10 individuals]
185	Erebidae	Erebinae	Catocalini	Catocala flebilis Grote, 1872	Catocala flebilis	Catocala flebilis[16 individuals]
186	Erebidae	Erebinae	Catocalini	Catocala gracilis Edwards, 1864	Catocala gracilis	Catocala gracilis[35 individuals]
187	Erebidae	Erebinae	Catocalini	Catocala grotiana Bailey, 1879	Catocala grotiana	Catocala grotiana[13 individuals]
188	Erebidae	Erebinae	Catocalini	Catocala grynea (Cramer, 1780)	Catocala grynea	Catocala grynea[14 individuals]
189	Erebidae	Erebinae	Catocalini	Catocala habilis Grote, 1872	Catocala habilis	Catocala habilis[9 individuals]
190	Erebidae	Erebinae	Catocalini	Catocala hermia Hy. Edwards, 1880	Catocala hermia	Catocala hermia[6 individuals]
191	Erebidae	Erebinae	Catocalini	Catocala ilia (Cramer, 1776)	Catocala ilia	Catocala ilia[5 individuals]
192	Erebidae	Erebinae	Catocalini	Catocala illecta Walker, [1858]	Catocala illecta	Catocala illecta[5 individuals]
193	Erebidae	Erebinae	Catocalini	Catocala innubens Guenée, 1852	Catocala innubens	Catocala innubens[3 individuals]
194	Erebidae	Erebinae	Catocalini	Catocala insolabilis Guenée, 1852	Catocala insolabilis	Catocala insolabilis[12 individuals]
195	Erebidae	Erebinae	Catocalini	Catocala judith Strecker, 1874	Catocala judith	Catocala judith[13 individuals]
196	Erebidae	Erebinae	Catocalini	Catocala junctura Walker, [1858]	Catocala junctura	Catocala junctura[2 individuals]
197	Erebidae	Erebinae	Catocalini	Catocala lacrymosa Guenée, 1852	Catocala lacrymosa	Catocala lacrymosa[23 individuals]
198	Erebidae	Erebinae	Catocalini	Catocala lineella Grote, 1872	Catocala lineella	Catocala lineella[1 individuals]
199	Erebidae	Erebinae	Catocalini	Catocala luciana Strecker, 1874	Catocala luciana	Catocala luciana[5 individuals]
200	Erebidae	Erebinae	Catocalini	Catocala meskei Grote, 1873	Catocala meskei	Catocala meskei[18 individuals]
201	Erebidae	Erebinae	Catocalini	Catocala micronympha Guenée, 1852	Catocala micronympha	Catocala micronympha[29 individuals]
202	Erebidae	Erebinae	Catocalini	Catocala minuta Edwards, 1864	Catocala minuta	Catocala minuta[1 individuals]
203	Erebidae	Erebinae	Catocalini	Catocala mira Grote, 1876	Catocala mira	Catocala mira[13 individuals]
204	Erebidae	Erebinae	Catocalini	Catocala nebulosa Hy. Edwards, 1864	Catocala nebulosa	Catocala nebulosa[8 individuals]
205	Erebidae	Erebinae	Catocalini	Catocala neogama (J.E. Smith, 1797)	Catocala neogama	Catocala neogama[12 individuals]
206	Erebidae	Erebinae	Catocalini	Catocala obscura Strecker, 1873	Catocala obscura	Catocala obscura[4 individuals]
207	Erebidae	Erebinae	Catocalini	Catocala palaeogama Guenée, 1852	Catocala palaeogama	Catocala palaeogama[1 individuals]
208	Erebidae	Erebinae	Catocalini	Catocala parta Guenée, 1852	Catocala parta	Catocala parta[7 individuals]
209	Erebidae	Erebinae	Catocalini	Catocala piatrix Grote, 1864	Catocala piatrix	Catocala piatrix[1 individuals]
210	Erebidae	Erebinae	Catocalini	Catocala praeclara Grote & Robinson, 1866	Catocala praeclara	Catocala praeclara[12 individuals]
211	Erebidae	Erebinae	Catocalini	Catocala relicta Walker, [1858]	Catocala relicta	Catocala relicta[18 individuals]
212	Erebidae	Erebinae	Catocalini	Catocala residua Grote, 1874	Catocala residua	Catocala residua[2 individuals]
213	Erebidae	Erebinae	Catocalini	Catocala retecta Grote, 1872	Catocala retecta	Catocala retecta[20 individuals]
214	Erebidae	Erebinae	Catocalini	Catocala robinsonii Grote, 1872	Catocala robinsonii	Catocala robinsonii[20 individuals]
215	Erebidae	Erebinae	Catocalini	Catocala semirelicta Grote, 1874	Catocala semirelicta	Catocala semirelicta[8 individuals]
216	Erebidae	Erebinae	Catocalini	Catocala serena Hy. Edwards, 1864	Catocala serena	Catocala serena[16 individuals]
217	Erebidae	Erebinae	Catocalini	Catocala similis Edwards, 1864	Catocala similis	Catocala similis[23 individuals]
218	Erebidae	Erebinae	Catocalini	Catocala sordida Grote, 1877	Catocala sordida	Catocala sordida[34 individuals]
219	Erebidae	Erebinae	Catocalini	Catocala subnata Grote, 1864	Catocala subnata	Catocala subnata[16 individuals]
220	Erebidae	Erebinae	Catocalini	Catocala ultronia (Hübner, 1823)	Catocala ultronia	Catocala ultronia[17 individuals]
221	Erebidae	Erebinae	Catocalini	Catocala umbrosa (Brou, 2003)	Catocala umbrosa	Catocala umbrosa[1 individuals]
222	Erebidae	Erebinae	Catocalini	Catocala unijuga Walker, [1858]	Catocala unijuga	Catocala unijuga[10 individuals]
223	Erebidae	Erebinae	Catocalini	Catocala vidua (J.E. Smith, 1797)	Catocala vidua	Catocala vidua[9 individuals]
224	Erebidae	Erebinae	Catocalini	Catocala whitneyi Dodge, 1874	Catocala whitneyi	Catocala whitneyi[5 individuals]
225	Erebidae	Erebinae	Catocalini	Spiloloma lunilinea Grote, 1873	Spiloloma lunilinea	Spiloloma lunilinea[12 individuals]
226	Erebidae	Erebinae	Euclidiini	Caenurgina annexa (Hy. Edwards, 1890)	Caenurgina annexa	Caenurgina annexa[7 individuals]
227	Erebidae	Erebinae	Euclidiini	Caenurgina caerulea (Grote, 1873)	Caenurgina caerulea	Caenurgina caerulea[4 individuals]
228	Erebidae	Erebinae	Euclidiini	Caenurgina crassiuscula (Haworth, 1809)	Caenurgina crassiuscula	Caenurgina crassiuscula[81 individuals]
229	Erebidae	Erebinae	Euclidiini	Caenurgina erechtea (Cramer, 1780)	Caenurgina erechtea	Caenurgina erechtea[33 individuals]
230	Erebidae	Erebinae	Euclidiini	Celiptera frustulum Guenée, 1852	Celiptera frustulum	Celiptera frustulum[3 individuals]
231	Erebidae	Erebinae	Euclidiini	Doryodes grandipennis Barnes & McDunnough, 1918	Doryodes grandipennis	Doryodes grandipennis[17 individuals]
232	Erebidae	Erebinae	Euclidiini	Euclidia ardita Franclemont, 1957	Euclidia ardita	Euclidia ardita[1 individuals]
233	Erebidae	Erebinae	Euclidiini	Euclidia cuspidea (Hübner, 1818)	Euclidia cuspidea	Euclidia cuspidea[12 individuals]
234	Erebidae	Erebinae	Euclidiini	Mocis latipes (Guenée, 1852)	Mocis latipes	Mocis latipes[9 individuals]
235	Erebidae	Erebinae	Melipotini	Bulia deducta (Morrison, 1875)	Bulia deducta	Bulia deducta[163 individuals]
236	Erebidae	Erebinae	Melipotini	Cissusa indiscreta (Hy. Edwards, 1886)	Cissusa indiscreta	Cissusa indiscreta[3 individuals]
237	Erebidae	Erebinae	Melipotini	Cissusa spadix (Cramer, 1780)	Cissusa spadix	Cissusa spadix[3 individuals]
238	Erebidae	Erebinae	Melipotini	Drasteria adumbrata (Behr, 1870)	Drasteria adumbrata	Drasteria adumbrata[21 individuals]
239	Erebidae	Erebinae	Melipotini	Drasteria divergens (Behr, 1870)	Drasteria divergens	Drasteria divergens[6 individuals]
240	Erebidae	Erebinae	Melipotini	Drasteria grandirena (Haworth, 1809)	Drasteria grandirena	Drasteria grandirena[14 individuals]
241	Erebidae	Erebinae	Melipotini	Drasteria hastingsii (Hy. Edwards, 1878)	Drasteria hastingsii	Drasteria hastingsii[8 individuals]
242	Erebidae	Erebinae	Melipotini	Drasteria howlandii (Grote, 1865)	Drasteria howlandii	Drasteria howlandii[1 individuals]
243	Erebidae	Erebinae	Melipotini	Drasteria hudsonica (Grote & Robinson, 1865)	Drasteria hudsonica	Drasteria hudsonica[30 individuals]
244	Erebidae	Erebinae	Melipotini	Drasteria ochracea (Behr, 1870)	Drasteria ochracea	Drasteria ochracea[1 individuals]
245	Erebidae	Erebinae	Melipotini	Drasteria pallescens (Grote & Robinson, 1866)	Drasteria pallescens	Drasteria pallescens[38 individuals]
246	Erebidae	Erebinae	Melipotini	Drasteria perplexa (Hy. Edwards, 1884)	Drasteria perplexa	Drasteria perplexa[1 individuals]
247	Erebidae	Erebinae	Melipotini	Drasteria petricola (Walker, 1858)	Drasteria petricola	Drasteria petricola[6 individuals]
248	Erebidae	Erebinae	Melipotini	Drasteria sabulosa (Hy. Edwards, 1881)	Drasteria sabulosa	Drasteria sabulosa[49 individuals]
249	Erebidae	Erebinae	Melipotini	Melipotis acontioides Guenée, 1852	Melipotis acontioides	Melipotis acontioides[19 individuals]
250	Erebidae	Erebinae	Melipotini	Melipotis indomita (Walker, [1858])	Melipotis indomita	Melipotis indomita[59 individuals]
251	Erebidae	Erebinae	Melipotini	Melipotis jucunda Hübner, 1818	Melipotis jucunda	Melipotis jucunda[9 individuals]
252	Erebidae	Erebinae	Melipotini	Melipotis perpendicularis (Guenée, 1852)	Melipotis perpendicularis	Melipotis perpendicularis[17 individuals]
253	Erebidae	Erebinae	Melipotini	Phoberia atomaris Hübner, 1818	Phoberia atomaris	Phoberia atomaris[27 individuals]
254	Erebidae	Erebinae	Omopterini	Amolita fessa Grote, 1874	Amolita fessa	Amolita fessa[8 individuals]
255	Erebidae	Erebinae	Omopterini	Euparthenos nubilis (Hübner, 1823)	Euparthenos nubilis	Euparthenos nubilis[1 individuals]
256	Erebidae	Erebinae	Omopterini	Lesmone detrahens (Walker, 1858)	Lesmone detrahens	Lesmone detrahens[20 individuals]
257	Erebidae	Erebinae	Omopterini	Zale aeruginosa (Guenée, 1852)	Zale aeruginosa	Zale aeruginosa[3 individuals]
258	Erebidae	Erebinae	Omopterini	Zale calycanthata (J.E. Smith, 1797)	Zale calycanthata	Zale calycanthata[3 individuals]
259	Erebidae	Erebinae	Omopterini	Zale duplicata (Bethune, 1865)	Zale duplicata	Zale duplicata[47 individuals]
260	Erebidae	Erebinae	Omopterini	Zale galbanata (Morrison, 1876)	Zale galbanata	Zale galbanata[23 individuals]
261	Erebidae	Erebinae	Omopterini	Zale helata (Smith, 1908)	Zale helata	Zale helata[19 individuals]
262	Erebidae	Erebinae	Omopterini	Zale horrida Hübner, 1819	Zale horrida	Zale horrida[15 individuals]
263	Erebidae	Erebinae	Omopterini	Zale intenta (Walker, [1858])	Zale intenta	Zale intenta[5 individuals]
264	Erebidae	Erebinae	Omopterini	Zale lunata (Drury, 1773)	Zale lunata	Zale lunata[8 individuals]
265	Erebidae	Erebinae	Omopterini	Zale metatoides McDunnough, 1943	Zale metatoides	Zale metatoides[3 individuals]
266	Erebidae	Erebinae	Omopterini	Zale minerea (Guenée, 1852)	Zale minerea	Zale minerea[46 individuals]
267	Erebidae	Erebinae	Omopterini	Zale phaeocapna Franclemont, 1950	Zale phaeocapna	Zale phaeocapna[2 individuals]
268	Erebidae	Erebinae	Omopterini	Zale submediana Strand, 1917	Zale submediana	Zale submediana[4 individuals]
269	Erebidae	Erebinae	Omopterini	Zale undularis (Drury, 1773)	Zale undularis	Zale undularis[3 individuals]
270	Erebidae	Erebinae	Omopterini	Zale unilineata (Grote, 1876)	Zale unilineata	Zale unilineata[8 individuals]
271	Erebidae	Erebinae	Poaphilini	Allotria elonympha (Hübner, 1818)	Allotria elonympha	Allotria elonympha[33 individuals]
272	Erebidae	Erebinae	Poaphilini	Argyrostrotis anilis (Drury, 1773)	Argyrostrotis anilis	Argyrostrotis anilis[3 individuals]
273	Erebidae	Erebinae	Poaphilini	Parallelia bistriaris Hübner, 1818	Parallelia bistriaris	Parallelia bistriaris[20 individuals]
274	Erebidae	Erebinae	Thermesiini	Ascalapha odorata (Linnaeus, 1758)	Ascalapha odorata	Ascalapha odorata[1 individuals]
275	Erebidae	Erebinae	Thermesiini	Thysania zenobia (Cramer, 1777)	Thysania zenobia	Thysania zenobia[2 individuals]
276	Erebidae	Eulepidotinae		Anticarsia gemmatalis Hübner, 1818	Anticarsia gemmatalis	Anticarsia gemmatalis[8 individuals]
277	Erebidae	Eulepidotinae		Panopoda carneicosta Guenée, 1852	Panopoda carneicosta	Panopoda carneicosta[4 individuals]
278	Erebidae	Eulepidotinae		Panopoda rufimargo (Hübner, 1818)	Panopoda rufimargo	Panopoda rufimargo[3 individuals]
279	Erebidae	Herminiinae		Bleptina caradrinalis Guenée, 1854	Bleptina caradrinalis	Bleptina caradrinalis[52 individuals]
280	Erebidae	Herminiinae		Chytolita morbidalis (Guenée, 1854)	Chytolita morbidalis	Chytolita morbidalis[71 individuals]
281	Erebidae	Herminiinae		Idia aemula Hübner, 1814	Idia aemula	Idia aemula[96 individuals]
282	Erebidae	Herminiinae		Idia americalis (Guenée, 1854)	Idia americalis	Idia americalis[161 individuals]
283	Erebidae	Herminiinae		Idia denticulalis (Harvey, 1875)	Idia denticulalis	Idia denticulalis[13 individuals]
284	Erebidae	Herminiinae		Idia diminuendis (Barnes & McDunnough, 1918)	Idia diminuendis	Idia diminuendis[1 individuals]
285	Erebidae	Herminiinae		Idia forbesii (French, 1894)	Idia forbesii	Idia forbesii[7 individuals]
286	Erebidae	Herminiinae		Idia immaculalis (Hulst, 1886)	Idia immaculalis	Idia immaculalis[3 individuals]
287	Erebidae	Herminiinae		Idia julia (Barnes & McDunnough, 1918)	Idia julia	Idia julia[9 individuals]
288	Erebidae	Herminiinae		Idia laurentii (Smith, 1893)	Idia laurentii	Idia lubricalis complex[27 individuals]
289	Erebidae	Herminiinae		Idia lubricalis (Geyer, 1832)	Idia lubricalis	Idia lubricalis[41 individuals]
290	Erebidae	Herminiinae		Idia majoralis (Smith, 1895)	Idia majoralis	Idia majoralis[7 individuals]
291	Erebidae	Herminiinae		Idia occidentalis (Smith, 1884)	Idia occidentalis	Idia occidentalis[10 individuals]
292	Erebidae	Herminiinae		Idia rotundalis (Walker, 1866)	Idia rotundalis	Idia rotundalis[63 individuals]
293	Erebidae	Herminiinae		Idia scobialis (Grote, 1880)	Idia scobialis	Idia scobialis[2 individuals]
294	Erebidae	Herminiinae		Lascoria ambigualis (Walker, 1866)	Lascoria ambigualis	Lascoria ambigualis[58 individuals]
295	Erebidae	Herminiinae		Macrochilo absorptalis (Walker, 1859)	Macrochilo absorptalis	Macrochilo absorptalis[23 individuals]
296	Erebidae	Herminiinae		Macrochilo bivittata (Grote, 1877)	Macrochilo bivittata	Macrochilo bivittata[6 individuals]
297	Erebidae	Herminiinae		Macrochilo litophora (Grote, 1873)	Macrochilo litophora	Macrochilo litophora[1 individuals]
298	Erebidae	Herminiinae		Macrochilo louisiana (Forbes, 1922)	Macrochilo louisiana	Macrochilo louisiana[5 individuals]
299	Erebidae	Herminiinae		Macrochilo orciferalis (Walker, 1859)	Macrochilo orciferalis	Macrochilo orciferalis[13 individuals]
300	Erebidae	Herminiinae		Palthis angulalis (Hübner, 1796)	Palthis angulalis	Palthis angulalis[68 individuals]
301	Erebidae	Herminiinae		Palthis asopialis (Guenée, 1854)	Palthis asopialis	Palthis asopialis[3 individuals]
302	Erebidae	Herminiinae		Phalaenophana pyramusalis (Walker, 1859)	Phalaenophana pyramusalis	Phalaenophana pyramusalis[52 individuals]
303	Erebidae	Herminiinae		Phalaenostola eumelusalis (Walker, 1859)	Phalaenostola eumelusalis	Phalaenostola eumelusalis[12 individuals]
304	Erebidae	Herminiinae		Phalaenostola hanhami (Smith, 1899)	Phalaenostola hanhami	Phalaenostola hanhami[7 individuals]
305	Erebidae	Herminiinae		Phalaenostola larentioides Grote, 1873	Phalaenostola larentioides	Phalaenostola larentioides[25 individuals]
306	Erebidae	Herminiinae		Phalaenostola metonalis (Walker, 1859)	Phalaenostola metonalis	Phalaenostola metonalis[39 individuals]
307	Erebidae	Herminiinae		Redectis vitrea (Grote, 1878)	Redectis vitrea	Redectis vitrea[1 individuals]
308	Erebidae	Herminiinae		Renia adspergillus (Bosc, [1800])	Renia adspergillus	Renia adspergillus[13 individuals]
309	Erebidae	Herminiinae		Renia discoloralis Guenée, 1854	Renia discoloralis	Renia discoloralis[69 individuals]
310	Erebidae	Herminiinae		Renia factiosalis (Walker, 1859)	Renia factiosalis	Renia factiosalis[20 individuals]
311	Erebidae	Herminiinae		Renia flavipunctalis (Geyer, 1832)	Renia flavipunctalis	Renia flavipunctalis[42 individuals]
312	Erebidae	Herminiinae		Renia sobrialis (Walker, 1859)	Renia sobrialis	Renia sobrialis[29 individuals]
313	Erebidae	Herminiinae		Tetanolita mynesalis (Walker, 1859)	Tetanolita mynesalis	Tetanolita mynesalis[45 individuals]
314	Erebidae	Herminiinae		Tetanolita palligera (Smith, 1884)	Tetanolita palligera	Tetanolita palligera[1 individuals]
315	Erebidae	Herminiinae		Zanclognatha cruralis (Guenée, 1854)	Zanclognatha cruralis	Zanclognatha cruralis[15 individuals]
316	Erebidae	Herminiinae		Zanclognatha dentata	Zanclognatha dentata	Zanclognatha dentata[52 individuals]
317	Erebidae	Herminiinae		Zanclognatha jacchusalis (Walker, 1859)	Zanclognatha jacchusalis	Zanclognatha jacchusalis[124 individuals]
318	Erebidae	Herminiinae		Zanclognatha laevigata (Grote, 1872)	Zanclognatha laevigata	Zanclognatha laevigata[22 individuals]
319	Erebidae	Herminiinae		Zanclognatha lituralis (Hübner, 1818)	Zanclognatha lituralis	Zanclognatha lituralis[2 individuals]
320	Erebidae	Herminiinae		Zanclognatha marcidilinea (Grote, 1872)	Zanclognatha marcidilinea	Zanclognatha marcidilinea[8 individuals]
321	Erebidae	Herminiinae		Zanclognatha obscuripennis (Grote, 1872)	Zanclognatha obscuripennis	Zanclognatha obscuripennis[24 individuals]
322	Erebidae	Herminiinae		Zanclognatha pedipilalis (Guenée, 1854)	Zanclognatha pedipilalis	Zanclognatha pedipilalis[21 individuals]
323	Erebidae	Herminiinae		Zanclognatha protumnusalis (Walker, 1859)	Zanclognatha protumnusalis	Zanclognatha protumnusalis[66 individuals]
324	Erebidae	Herminiinae		Zanclognatha theralis (Walker, 1859)	Zanclognatha theralis	Zanclognatha theralis[12 individuals]
325	Erebidae	Hypeninae		Colobochyla interpuncta (Grote, 1872)	Colobochyla interpuncta	Colobochyla interpuncta[4 individuals]
326	Erebidae	Hypeninae		Hypena abalienalis Walker, 1859	Hypena abalienalis	Hypena abalienalis[17 individuals]
327	Erebidae	Hypeninae		Hypena atomaria (Smith, 1903)	Hypena atomaria	Hypena atomaria[6 individuals]
328	Erebidae	Hypeninae		Hypena baltimoralis Guenée, 1854	Hypena baltimoralis	Hypena baltimoralis[129 individuals]
329	Erebidae	Hypeninae		Hypena bijugalis Walker, 1859	Hypena bijugalis	Hypena bijugalis[19 individuals]
330	Erebidae	Hypeninae		Hypena californica Behr, 1870	Hypena californica	Hypena californica[24 individuals]
331	Erebidae	Hypeninae		Hypena deceptalis Walker, 1859	Hypena deceptalis	Hypena deceptalis[29 individuals]
332	Erebidae	Hypeninae		Hypena decorata Smith, 1884	Hypena decorata	Hypena decorata[1 individuals]
333	Erebidae	Hypeninae		Hypena edictalis Walker, 1859	Hypena edictalis	Hypena edictalis[9 individuals]
334	Erebidae	Hypeninae		Hypena eductalis (Walker, 1859)	Hypena eductalis	Hypena eductalis[14 individuals]
335	Erebidae	Hypeninae		Hypena humuli Harris, 1841	Hypena humuli	Hypena humuli[25 individuals]
336	Erebidae	Hypeninae		Hypena madefactalis Guenée, 1854	Hypena madefactalis	Hypena madefactalis[30 individuals]
337	Erebidae	Hypeninae		Hypena manalis Walker, 1859	Hypena manalis	Hypena manalis[9 individuals]
338	Erebidae	Hypeninae		Hypena minualis Guenée, 1854	Hypena minualis	Hypena minualis[4 individuals]
339	Erebidae	Hypeninae		Hypena modestoides Poole, 1989	Hypena modestoides	Hypena modestoides
340	Erebidae	Hypeninae		Hypena palparia (Walker, 1861)	Hypena palparia	Hypena palparia[24 individuals]
341	Erebidae	Hypeninae		Hypena scabra (Fabricius, 1798)	Hypena scabra	Hypena scabra[62 individuals]
342	Erebidae	Hypeninae		Hypena sordidula Grote, 1872	Hypena sordidula	Hypena sordidula[5 individuals]
343	Erebidae	Hypeninae		Melanomma auricinctaria Grote, 1875	Melanomma auricinctaria	Melanomma auricinctaria[3 individuals]
344	Erebidae	Hypenodinae		Dyspyralis illocata Warren, 1891	Dyspyralis illocata	Dyspyralis illocata[12 individuals]
345	Erebidae	Hypenodinae		Dyspyralis nigellus (Strecker, 1900)	Dyspyralis nigellus	Dyspyralis nigellus[9 individuals]
346	Erebidae	Hypenodinae		Dyspyralis puncticosta (Smith, 1908)	Dyspyralis puncticosta	Dyspyralis puncticosta[2 individuals]
347	Erebidae	Hypenodinae		Hypenodes caducus (Dyar, 1907)	Hypenodes caducus	Hypenodes caducus[25 individuals]
348	Erebidae	Hypenodinae		Hypenodes fractilinea (Smith, 1908)	Hypenodes fractilinea	Hypenodes fractilinea[6 individuals]
349	Erebidae	Hypenodinae		Hypenodes franclemonti Ferguson, 1954	Hypenodes franclemonti	Hypenodes franclemonti[4 individuals]
350	Erebidae	Hypenodinae		Hypenodes palustris Ferguson, 1954	Hypenodes palustris	Hypenodes palustris[101 individuals]
351	Erebidae	Hypenodinae		Hypenodes sombrus Ferguson, 1954	Hypenodes sombrus	Hypenodes sombrus[15 individuals]
352	Erebidae	Hypenodinae		Parahypenodes quadralis Barnes & McDunnough, 1918	Parahypenodes quadralis	Parahypenodes quadralis[7 individuals]
353	Erebidae	Hypocalinae		Hypocala andremona (Cramer, 1784)	Hypocala andremona	Hypocala andremona[18 individuals]
354	Erebidae	Hypocalinae		Hypsoropha hormos Hübner, 1818	Hypsoropha hormos	Hypsoropha hormos[25 individuals]
355	Erebidae	Lymantriinae	Leucomini	Leucoma salicis (Linnaeus, 1758)	Leucoma salicis	Leucoma salicis[70 individuals]
356	Erebidae	Lymantriinae	Lymantriini	Lymantria dispar (Linnaeus, 1758)	Lymantria dispar	Lymantria dispar[62 individuals]
357	Erebidae	Lymantriinae	Nygmiini	Euproctis chrysorrhoea (Linnaeus, 1758)	Euproctis chrysorrhoea	Euproctis chrysorrhoea[45 individuals]
358	Erebidae	Lymantriinae	Nygmiini	Euproctis similis (Fuessly, 1775)	Euproctis similis	Euproctis similis[17 individuals]
359	Erebidae	Lymantriinae	Orgyiini	Dasychira basiflava (Packard, 1864)	Dasychira basiflava	Dasychira basiflava[25 individuals]
360	Erebidae	Lymantriinae	Orgyiini	Dasychira dorsipennata (Barnes & McDunnough, 1919)	Dasychira dorsipennata	Dasychira dorsipennata[2 individuals]
361	Erebidae	Lymantriinae	Orgyiini	Dasychira grisefacta (Dyar, 1911)	Dasychira grisefacta	Dasychira grisefacta[43 individuals]
362	Erebidae	Lymantriinae	Orgyiini	Dasychira obliquata (Grote & Robinson, 1866)	Dasychira obliquata	Dasychira obliquata[7 individuals]
363	Erebidae	Lymantriinae	Orgyiini	Dasychira pinicola (Dyar, 1911)	Dasychira pinicola	Dasychira pinicola[2 individuals]
364	Erebidae	Lymantriinae	Orgyiini	Dasychira plagiata (Walker, 1865)	Dasychira plagiata	Dasychira plagiata[24 individuals]
365	Erebidae	Lymantriinae	Orgyiini	Dasychira vagans (Barnes & McDunnough, 1913)	Dasychira vagans	Dasychira vagans[19 individuals]
366	Erebidae	Lymantriinae	Orgyiini	Gynaephora groenlandica (Wocke, 1874)	Gynaephora groenlandica	Gynaephora groenlandica[6 individuals]
367	Erebidae	Lymantriinae	Orgyiini	Gynaephora rossii (Curtis, 1835)	Gynaephora rossii	Gynaephora rossii[6 individuals]
368	Erebidae	Lymantriinae	Orgyiini	Orgyia antiqua (Linnaeus, 1758)	Orgyia antiqua	Orgyia antiqua[4 individuals]
369	Erebidae	Lymantriinae	Orgyiini	Orgyia definita Packard, 1864	Orgyia definita	Orgyia definita[31 individuals]
370	Erebidae	Lymantriinae	Orgyiini	Orgyia leucostigma (J.E. Smith, 1797)	Orgyia leucostigma	Orgyia leucostigma[41 individuals]
371	Erebidae	Lymantriinae	Orgyiini	Orgyia pseudotsugata (McDunnough, 1921)	Orgyia pseudotsugata	Orgyia pseudotsugata[151 individuals]
372	Erebidae	Pangraptinae		Ledaea perditalis (Walker, 1859)	Ledaea perditalis	Ledaea perditalis[3 individuals]
373	Erebidae	Pangraptinae		Pangrapta decoralis Hübner, 1818	Pangrapta decoralis	Pangrapta decoralis[25 individuals]
374	Erebidae	Rivulinae		Oxycilla malaca (Grote, 1873)	Oxycilla malaca	Oxycilla malaca[5 individuals]
375	Erebidae	Rivulinae		Rivula propinqualis Guenée, 1854	Rivula propinqualis	Rivula propinqualis[77 individuals]
376	Erebidae	Scolecocampinae		Gabara subnivosella Walker, 1866	Gabara subnivosella	Gabara subnivosella[19 individuals]
377	Erebidae	Scolecocampinae		Nigetia formosalis Walker, 1866	Nigetia formosalis	Nigetia formosalis[1 individuals]
378	Erebidae	Scolecocampinae		Phobolosia anfracta (Hy. Edwards, 1881)	Phobolosia anfracta	Phobolosia anfracta[2 individuals]
379	Erebidae	Scolecocampinae		Scolecocampa liburna (Geyer, 1837)	Scolecocampa liburna	Scolecocampa liburna[29 individuals]
380	Erebidae	Scoliopteryginae	Anomini	Alabama argillacea (Hübner, 1823)	Alabama argillacea	Alabama argillacea[1 individuals]
381	Erebidae	Scoliopteryginae	Anomini	Anomis erosa Hübner, 1821	Anomis erosa	Anomis erosa[15 individuals]
382	Erebidae	Scoliopteryginae	Anomini	Anomis flava (Fabricius, 1775)	Anomis flava	Anomis flava[2 individuals]
383	Erebidae	Scoliopteryginae	Scoliopterygini	Scoliopteryx libatrix (Linnaeus, 1758)	Scoliopteryx libatrix	Scoliopteryx libatrix[21 individuals]
384	Erebidae	Toxocampinae		Lygephila victoria (Grote, 1874)	Lygephila victoria	Lygephila victoria[23 individuals]
385	Erebidae	Toxocampinae		Tathorhynchus exsiccata (Lederer, 1855)	Tathorhynchus exsiccata	Tathorhynchus exsiccata[5 individuals]
386	Euteliidae	Euteliinae		Eutelia pulcherrimus (Grote, 1865)	Eutelia pulcherrimus	Eutelia pulcherrimus[1 individuals]
387	Euteliidae	Euteliinae		Marathyssa basalis Walker, 1865	Marathyssa basalis	Marathyssa basalis[23 individuals]
388	Euteliidae	Euteliinae		Marathyssa inficita (Walker, 1865)	Marathyssa inficita	Marathyssa inficita[24 individuals]
389	Euteliidae	Euteliinae		Paectes abrostolella (Walker, 1866)	Paectes abrostolella	Paectes abrostolella[4 individuals]
390	Euteliidae	Euteliinae		Paectes abrostoloides (Guenée, 1852)	Paectes abrostoloides	Paectes abrostoloides[19 individuals]
391	Euteliidae	Euteliinae		Paectes nubifera Hampson, 1912	Paectes nubifera	Paectes nubifera[3 individuals]
392	Euteliidae	Euteliinae		Paectes oculatrix (Guenée, 1852)	Paectes oculatrix	Paectes oculatrix[1 individuals]
393	Euteliidae	Euteliinae		Paectes pygmaea Hübner, 1818	Paectes pygmaea	Paectes pygmaea[15 individuals]
394	Nolidae	Chloephorinae	Sarrothripini	Nycteola cinereana Neumoegen & Dyar, 1893	Nycteola cinereana	Nycteola cinereana[18 individuals]
395	Nolidae	Chloephorinae	Sarrothripini	Nycteola columbiana (Hy. Edwards, 1873)	Nycteola columbiana	Nycteola columbiana[1 individuals]
396	Nolidae	Chloephorinae	Sarrothripini	Nycteola frigidana (Walker, 1863)	Nycteola frigidana	Nycteola frigidana[11 individuals]
397	Nolidae	Chloephorinae	Sarrothripini	Nycteola metaspilella (Walker, 1866)	Nycteola metaspilella	Nycteola metaspilella[8 individuals]
398	Nolidae	Nolinae		Garella nilotica (Rogenhofer, 1881)	Garella nilotica	Garella nilotica[6 individuals]
399	Nolidae	Nolinae		Meganola minuscula (Zeller, 1872)	Meganola minuscula	Meganola minuscula[10 individuals]
400	Nolidae	Nolinae		Meganola phylla (Dyar, 1898)	Meganola phylla	Meganola phylla[4 individuals]
401	Nolidae	Nolinae		Meganola spodia Franclemont, 1985	Meganola spodia	Meganola spodia[5 individuals]
402	Nolidae	Nolinae		Nola cilicoides (Grote, 1873)	Nola cilicoides	Nola cilicoides[22 individuals]
403	Nolidae	Nolinae		Nola minna Butler, 1881	Nola minna	Nola minna[1 individuals]
404	Nolidae	Nolinae		Nola ovilla Grote, 1875	Nola ovilla	Nola ovilla[5 individuals]
405	Nolidae	Nolinae		Nola triquetrana (Fitch, 1856)	Nola triquetrana	Nola triquetrana[2 individuals]
406	Nolidae	Risobinae		Baileya australis (Grote, 1881)	Baileya australis	Baileya australis[23 individuals]
407	Nolidae	Risobinae		Baileya dormitans (Guenée, 1852)	Baileya dormitans	Baileya dormitans[23 individuals]
408	Nolidae	Risobinae		Baileya doubledayi (Guenée, 1852)	Baileya doubledayi	Baileya doubledayi[12 individuals]
409	Nolidae	Risobinae		Baileya levitans (Smith, 1906)	Baileya levitans	Baileya levitans[3 individuals]
410	Nolidae	Risobinae		Baileya ophthalmica (Guenée, 1852)	Baileya ophthalmica	Baileya ophthalmica[60 individuals]
411	Noctuidae	Acontiinae	Acontiini	Ponometia binocula (Grote, 1875)	Ponometia binocula	Ponometia binocula[6 individuals]
412	Noctuidae	Acontiinae	Acontiini	Ponometia candefacta (Hübner, [1831])	Ponometia candefacta	Ponometia candefacta[31 individuals]
413	Noctuidae	Acontiinae	Acontiini	Ponometia elegantula (Harvey, 1876)	Ponometia elegantula	Ponometia elegantula[2 individuals]
414	Noctuidae	Acontiinae	Acontiini	Ponometia erastrioides (Guenée, 1852)	Ponometia erastrioides	Ponometia erastrioides[36 individuals]
415	Noctuidae	Acontiinae	Acontiini	Ponometia fasciatella (Grote, 1875)	Ponometia fasciatella	Ponometia fasciatella[16 individuals]
416	Noctuidae	Acontiinae	Acontiini	Ponometia semiflava (Guenée, 1852)	Ponometia semiflava	Ponometia semiflava[2 individuals]
417	Noctuidae	Acontiinae	Acontiini	Ponometia sutrix (Grote, 1880)	Ponometia sutrix	Ponometia sutrix[1 individuals]
418	Noctuidae	Acontiinae	Acontiini	Ponometia tortricina (Zeller, 1872)	Ponometia tortricina	Ponometia tortricina[4 individuals]
419	Noctuidae	Acontiinae	Acontiini	Ponometia virginalis (Grote, 1881)	Ponometia virginalis	Ponometia virginalis[2 individuals]
420	Noctuidae	Acontiinae	Acontiini	Spragueia leo (Guenée, 1852)	Spragueia leo	Spragueia leo[1 individuals]
421	Noctuidae	Acontiinae	Acontiini	Tarache aprica (Hübner, [1808])	Tarache aprica	Tarache aprica[35 individuals]
422	Noctuidae	Acontiinae	Acontiini	Tarache areli (Strecker, 1898)	Tarache areli	Tarache areli[5 individuals]
423	Noctuidae	Acontiinae	Acontiini	Tarache augustipennis Grote, 1875	Tarache augustipennis	Tarache augustipennis[9 individuals]
424	Noctuidae	Acontiinae	Acontiini	Tarache major (Smith, 1900)	Tarache major	Tarache major[8 individuals]
425	Noctuidae	Acontiinae	Acontiini	Tarache terminimaculata Grote, 1873	Tarache terminimaculata	Tarache terminimaculata[8 individuals]
426	Noctuidae	Acronictinae		Acronicta afflicta (Grote, 1864)	Acronicta afflicta	Acronicta afflicta[1 individuals]
427	Noctuidae	Acronictinae		Acronicta albarufa (Grote, 1874)	Acronicta albarufa	Acronicta albarufa[1 individuals]
428	Noctuidae	Acronictinae		Acronicta americana (Harris, 1841)	Acronicta americana	Acronicta americana[53 individuals]
429	Noctuidae	Acronictinae		Acronicta clarescens (Guenée, 1852)	Acronicta clarescens	Acronicta clarescens[4 individuals]
430	Noctuidae	Acronictinae		Acronicta connecta (Grote, 1873)	Acronicta connecta	Acronicta connecta[3 individuals]
431	Noctuidae	Acronictinae		Acronicta cyanescens (Guenée, 1852)	Acronicta cyanescens	Acronicta cyanescens[13 individuals]
432	Noctuidae	Acronictinae		Acronicta dactylina (Grote, 1874)	Acronicta dactylina	Acronicta dactylina[134 individuals]
433	Noctuidae	Acronictinae		Acronicta exilis (Grote, 1874)	Acronicta exilis	Acronicta exilis[8 individuals]
434	Noctuidae	Acronictinae		Acronicta falcula (Grote, 1877)	Acronicta falcula	Acronicta falcula
435	Noctuidae	Acronictinae		Acronicta fragilis (Guenée, 1852)	Acronicta fragilis	Acronicta fragilis[36 individuals]
436	Noctuidae	Acronictinae		Acronicta funeralis (Grote & Robinson, 1866)	Acronicta funeralis	Acronicta funeralis[24 individuals]
437	Noctuidae	Acronictinae		Acronicta grisea (Walker, 1856)	Acronicta grisea	Acronicta grisea[55 individuals]
438	Noctuidae	Acronictinae		Acronicta haesitata (Grote, 1882)	Acronicta haesitata	Acronicta haesitata[8 individuals]
439	Noctuidae	Acronictinae		Acronicta hamamelis (Guenée, 1852)	Acronicta hamamelis	Acronicta hamamelis[3 individuals]
440	Noctuidae	Acronictinae		Acronicta hasta (Guenée, 1852)	Acronicta hasta	Acronicta hasta[52 individuals]
441	Noctuidae	Acronictinae		Acronicta heitzmani Covell & Metzler, 1992	Acronicta heitzmani	Acronicta heitzmani[2 individuals]
442	Noctuidae	Acronictinae		Acronicta impleta (Walker, 1856)	Acronicta impleta	Acronicta impleta[13 individuals]
443	Noctuidae	Acronictinae		Acronicta impressa (Walker, 1856)	Acronicta impressa	Acronicta impressa[49 individuals]
444	Noctuidae	Acronictinae		Acronicta increta (Morrison, 1974)	Acronicta increta	Acronicta increta[39 individuals]
445	Noctuidae	Acronictinae		Acronicta innotata (Guenée, 1852)	Acronicta innotata	Acronicta innotata[95 individuals]
446	Noctuidae	Acronictinae		Acronicta interrupta (Guenée, 1852)	Acronicta interrupta	Acronicta interrupta[11 individuals]
447	Noctuidae	Acronictinae		Acronicta laetifica (Smith, 1897)	Acronicta laetifica	Acronicta laetifica[12 individuals]
448	Noctuidae	Acronictinae		Acronicta lanceolaria (Grote, 1875)	Acronicta lanceolaria	Acronicta lanceolaria[2 individuals]
449	Noctuidae	Acronictinae		Acronicta lepusculina (Guenée, 1852)	Acronicta lepusculina	Acronicta lepusculina[30 individuals]
450	Noctuidae	Acronictinae		Acronicta lithospila (Grote, 1874)	Acronicta lithospila	Acronicta lithospila[5 individuals]
451	Noctuidae	Acronictinae		Acronicta lobeliae (Guenée, 1852)	Acronicta lobeliae	Acronicta lobeliae[3 individuals]
452	Noctuidae	Acronictinae		Acronicta longa (Guenée, 1852)	Acronicta longa	Acronicta longa[4 individuals]
453	Noctuidae	Acronictinae		Acronicta lupini (Grote, 1873)	Acronicta lupini	Acronicta lupini[11 individuals]
454	Noctuidae	Acronictinae		Acronicta mansueta (Smith, 1897)	Acronicta mansueta	Acronicta mansueta[8 individuals]
455	Noctuidae	Acronictinae		Acronicta marmorata (Smith, 1897)	Acronicta marmorata	Acronicta marmorata[4 individuals]
456	Noctuidae	Acronictinae		Acronicta modica (Walker, 1856)	Acronicta modica	Acronicta modica[3 individuals]
457	Noctuidae	Acronictinae		Acronicta morula (Grote & Robinson, 1868)	Acronicta morula	Acronicta morula[21 individuals]
458	Noctuidae	Acronictinae		Acronicta noctivaga (Grote, 1864)	Acronicta noctivaga	Acronicta noctivaga[12 individuals]
459	Noctuidae	Acronictinae		Acronicta oblinita (J.E. Smith, 1797)	Acronicta oblinita	Acronicta oblinita[20 individuals]
460	Noctuidae	Acronictinae		Acronicta ovata (Grote, 1873)	Acronicta ovata	Acronicta ovata[3 individuals]
461	Noctuidae	Acronictinae		Acronicta perdita (Grote, 1874)	Acronicta perdita	Acronicta perdita[3 individuals]
462	Noctuidae	Acronictinae		Acronicta quadrata (Grote, 1874)	Acronicta quadrata	Acronicta quadrata[5 individuals]
463	Noctuidae	Acronictinae		Acronicta radcliffei (Harvey, 1875)	Acronicta radcliffei	Acronicta radcliffei[11 individuals]
464	Noctuidae	Acronictinae		Acronicta retardata (Walker, 1861)	Acronicta retardata	Acronicta retardata[14 individuals]
465	Noctuidae	Acronictinae		Acronicta rubricoma (Guenée, 1852)	Acronicta rubricoma	Acronicta rubricoma[13 individuals]
466	Noctuidae	Acronictinae		Acronicta sperata (Grote, 1873)	Acronicta sperata	Acronicta sperata[6 individuals]
467	Noctuidae	Acronictinae		Acronicta spinigera (Guenée, 1852)	Acronicta spinigera	Acronicta spinigera[6 individuals]
468	Noctuidae	Acronictinae		Acronicta strigulata (Smith, 1897)	Acronicta strigulata	Acronicta strigulata[3 individuals]
469	Noctuidae	Acronictinae		Acronicta superans (Guenée, 1852)	Acronicta superans	Acronicta superans[16 individuals]
470	Noctuidae	Acronictinae		Acronicta tristis (Smith, 1911)	Acronicta tristis	Acronicta tristis[35 individuals]
471	Noctuidae	Acronictinae		Acronicta tritona (Hübner, 1818)	Acronicta tritona	Acronicta tritona[3 individuals]
472	Noctuidae	Acronictinae		Acronicta vinnula (Grote, 1864)	Acronicta vinnula	Acronicta vinnula[7 individuals]
473	Noctuidae	Acronictinae		Acronicta vulpina Guenée, 1852	Acronicta vulpina	Acronicta vulpina[25 individuals]
474	Noctuidae	Acronictinae		Agriopodes fallax (Herrich-Schäffer, 1854)	Agriopodes fallax	Agriopodes fallax[15 individuals]
475	Noctuidae	Acronictinae		Agriopodes geminata (Smith, 1903)	Agriopodes geminata	Agriopodes geminata[1 individuals]
476	Noctuidae	Acronictinae		Cerma cerintha (Treitschke, 1826)	Cerma cerintha	Cerma cerintha[12 individuals]
477	Noctuidae	Acronictinae		Cerma cora Hübner, 1818	Cerma cora	Cerma cora[7 individuals]
478	Noctuidae	Acronictinae		Harrisimemna trisignata (Walker, 1856)	Harrisimemna trisignata	Harrisimemna trisignata[19 individuals]
479	Noctuidae	Acronictinae		Polygrammate hebraeicum Hübner, 1818	Polygrammate hebraeicum	Polygrammate hebraeicum[1 individuals]
480	Noctuidae	Acronictinae		Simyra insularis (Herrich-Schäffer, 1868)	Simyra insularis	Simyra insularis[27 individuals]
481	Noctuidae	Agaristinae		Alypia langtoni Couper, 1865	Alypia langtoni	Alypia langtoni[8 individuals]
482	Noctuidae	Agaristinae		Alypia octomaculata (Fabricius, 1775)	Alypia octomaculata	Alypia octomaculata[6 individuals]
483	Noctuidae	Agaristinae		Alypia ridingsii Grote, 1865	Alypia ridingsii	Alypia ridingsii[2 individuals]
484	Noctuidae	Agaristinae		Androloma maccullochii (Kirby, 1837)	Androloma maccullochii	Androloma maccullochii[8 individuals]
485	Noctuidae	Agaristinae		Eudryas grata (Fabricius, 1793)	Eudryas grata	Eudryas grata[20 individuals]
486	Noctuidae	Agaristinae		Eudryas unio (Hübner, [1831])	Eudryas unio	Eudryas unio[14 individuals]
487	Noctuidae	Agaristinae		Psychomorpha epimenis (Drury, 1782)	Psychomorpha epimenis	Psychomorpha epimenis[4 individuals]
488	Noctuidae	Amphipyrinae	Amphipyrini	Amphipyra glabella (Morrison, 1874)	Amphipyra glabella	Amphipyra glabella[6 individuals]
489	Noctuidae	Amphipyrinae	Amphipyrini	Amphipyra pyramidoides Guenée, 1852	Amphipyra pyramidoides	Amphipyra pyramidoides[37 individuals]
490	Noctuidae	Amphipyrinae	Amphipyrini	Amphipyra tragopoginis (Clerck, 1759)	Amphipyra tragopoginis	Amphipyra tragopoginis[20 individuals]
491	Noctuidae	Amphipyrinae	Psaphidini	Acopa perpallida Grote, 1878	Acopa perpallida	Acopa perpallida[8 individuals]
492	Noctuidae	Amphipyrinae	Psaphidini	Brachionycha borealis (Smith, 1899)	Brachionycha borealis	Brachionycha borealis[4 individuals]
493	Noctuidae	Amphipyrinae	Psaphidini	Copivaleria grotei (Morrison, 1874)	Copivaleria grotei	Copivaleria grotei[41 individuals]
494	Noctuidae	Amphipyrinae	Psaphidini	Feralia comstocki Grote, 1874	Feralia comstocki	Feralia comstocki[28 individuals]
495	Noctuidae	Amphipyrinae	Psaphidini	Feralia deceptiva McDunnough, 1920	Feralia deceptiva	Feralia deceptiva[7 individuals]
496	Noctuidae	Amphipyrinae	Psaphidini	Feralia jocosa (Guenée, 1852)	Feralia jocosa	Feralia jocosa[35 individuals]
497	Noctuidae	Amphipyrinae	Psaphidini	Feralia major Smith, 1890	Feralia major	Feralia major[21 individuals]
498	Noctuidae	Amphipyrinae	Psaphidini	Psaphida electilis (Morrison, 1875)	Psaphida electilis	Psaphida electilis[3 individuals]
499	Noctuidae	Amphipyrinae	Psaphidini	Psaphida grandis (Smith, 1898)	Psaphida grandis	Psaphida grandis[2 individuals]
500	Noctuidae	Amphipyrinae	Psaphidini	Psaphida resumens Walker, 1865	Psaphida resumens	Psaphida resumens[2 individuals]
501	Noctuidae	Amphipyrinae	Psaphidini	Psaphida rolandi (Grote, 1874)	Psaphida rolandi	Psaphida rolandi[2 individuals]
502	Noctuidae	Amphipyrinae	Psaphidini	Psaphida styracis (Guenée, 1852)	Psaphida styracis	Psaphida styracis[2 individuals]
503	Noctuidae	Amphipyrinae	Psaphidini	Psaphida thaxterianus (Grote, 1874)	Psaphida thaxterianus	Psaphida thaxterianus[1 individuals]
504	Noctuidae	Amphipyrinae	Stiriini	Annaphila danistica Grote, 1873	Annaphila danistica	Annaphila danistica
505	Noctuidae	Amphipyrinae	Stiriini	Annaphila decia Grote, 1875	Annaphila decia	Annaphila decia[1 individuals]
506	Noctuidae	Amphipyrinae	Stiriini	Annaphila diva Grote, 1873	Annaphila diva	Annaphila diva[5 individuals]
507	Noctuidae	Amphipyrinae	Stiriini	Azenia obtusa (Herrich-Schäffer, 1854)	Azenia obtusa	Azenia obtusa[30 individuals]
508	Noctuidae	Amphipyrinae	Stiriini	Cirrhophanus triangulifer Grote, 1872	Cirrhophanus triangulifer	Cirrhophanus triangulifer[6 individuals]
509	Noctuidae	Amphipyrinae	Stiriini	Plagiomimicus expallidus Grote, 1883	Plagiomimicus expallidus	Plagiomimicus expallidus[1 individuals]
510	Noctuidae	Amphipyrinae	Stiriini	Plagiomimicus heitzmani Poole, 1995	Plagiomimicus heitzmani	Plagiomimicus heitzmani[1 individuals]
511	Noctuidae	Amphipyrinae	Stiriini	Plagiomimicus pityochromus Grote, 1873	Plagiomimicus pityochromus	Plagiomimicus pityochromus[11 individuals]
512	Noctuidae	Amphipyrinae	Stiriini	Plagiomimicus spumosum (Grote, 1874)	Plagiomimicus spumosum	Plagiomimicus spumosum[1 individuals]
513	Noctuidae	Amphipyrinae	Stiriini	Stiria rugifrons Grote, 1874	Stiria rugifrons	Stiria rugifrons[4 individuals]
514	Noctuidae	Bagisarinae		Amyna axis Guenée, 1852	Amyna axis	Amyna axis[14 individuals]
515	Noctuidae	Bagisarinae		Amyna bullula (Grote, 1873)	Amyna bullula	Amyna bullula[2 individuals]
516	Noctuidae	Bagisarinae		Bagisara rectifascia (Grote, 1874)	Bagisara rectifascia	Bagisara rectifascia[6 individuals]
517	Noctuidae	Balsinae		Balsa labecula (Grote, 1880)	Balsa labecula	Balsa labecula[28 individuals]
518	Noctuidae	Balsinae		Balsa malana (Fitch, 1856)	Balsa malana	Balsa malana[10 individuals]
519	Noctuidae	Balsinae		Balsa tristrigella (Walker, 1866)	Balsa tristrigella	Balsa tristrigella[60 individuals]
520	Noctuidae	Bryophilinae		Cryphia cuerva (Barnes, 1907)	Cryphia cuerva	Cryphia cuerva[35 individuals]
521	Noctuidae	Bryophilinae		Cryphia olivacea (Smith, 1891)	Cryphia olivacea	Cryphia olivacea[16 individuals]
522	Noctuidae	Condicinae	Condicini	Condica cupentia (Cramer, 1780)	Condica cupentia	Condica cupentia[7 individuals]
523	Noctuidae	Condicinae	Condicini	Condica discistriga (Smith, 1894)	Condica discistriga	Condica discistriga[52 individuals]
524	Noctuidae	Condicinae	Condicini	Condica sutor (Guenée, 1852)	Condica sutor	Condica sutor[26 individuals]
525	Noctuidae	Condicinae	Condicini	Condica vecors (Guenée, 1852)	Condica vecors	Condica vecors[5 individuals]
526	Noctuidae	Condicinae	Condicini	Condica videns (Guenée, 1852)	Condica videns	Condica videns[22 individuals]
527	Noctuidae	Condicinae	Condicini	Homophoberia apicosa (Haworth, 1809)	Homophoberia apicosa	Homophoberia apicosa[5 individuals]
528	Noctuidae	Condicinae	Condicini	Homophoberia cristata Morrison, 1875	Homophoberia cristata	Homophoberia cristata[3 individuals]
529	Noctuidae	Condicinae	Condicini	Ogdoconta cinereola (Guenée, 1852)	Ogdoconta cinereola	Ogdoconta cinereola[14 individuals]
530	Noctuidae	Condicinae	Condicini	Perigea xanthioides Guenée, 1852	Perigea xanthioides	Perigea xanthioides[6 individuals]
531	Noctuidae	Condicinae	Leuconyctini	Crambodes talidiformis Guenée, 1852	Crambodes talidiformis	Crambodes talidiformis[4 individuals]
532	Noctuidae	Condicinae	Leuconyctini	Leuconycta diphteroides (Guenée, 1852)	Leuconycta diphteroides	Leuconycta diphteroides[52 individuals]
533	Noctuidae	Condicinae	Leuconyctini	Leuconycta lepidula (Grote, 1874)	Leuconycta lepidula	Leuconycta lepidula[23 individuals]
534	Noctuidae	Condicinae	Leuconyctini	Micrathetis triplex (Walker, 1857)	Micrathetis triplex	Micrathetis triplex[1 individuals]
535	Noctuidae	Cuculliinae		Cucullia albida Smith, 1894	Cucullia albida	Cucullia albida[3 individuals]
536	Noctuidae	Cuculliinae		Cucullia antipoda Strecker, 1878	Cucullia antipoda	Cucullia antipoda group[6 individuals]
537	Noctuidae	Cuculliinae		Cucullia asteroides Guenée, 1852	Cucullia asteroides	Cucullia asteroides[17 individuals]
538	Noctuidae	Cuculliinae		Cucullia convexipennis Grote & Robinson, 1868	Cucullia convexipennis	Cucullia convexipennis[3 individuals]
539	Noctuidae	Cuculliinae		Cucullia dorsalis Lintner, 1874	Cucullia dorsalis	Cucullia dorsalis[1 individuals]
540	Noctuidae	Cuculliinae		Cucullia eulepis (Grote, 1876)	Cucullia eulepis	Cucullia eulepis[1 individuals]
541	Noctuidae	Cuculliinae		Cucullia florea Guenée, 1852	Cucullia florea	Cucullia florea[5 individuals]
542	Noctuidae	Cuculliinae		Cucullia intermedia Speyer, 1870	Cucullia intermedia	Cucullia intermedia[34 individuals]
543	Noctuidae	Cuculliinae		Cucullia luna Morrison, 1875	Cucullia luna	Cucullia luna[3 individuals]
544	Noctuidae	Cuculliinae		Cucullia mcdunnoughi (Henne, 1940)	Cucullia mcdunnoughi	Cucullia mcdunnoughi[2 individuals]
545	Noctuidae	Cuculliinae		Cucullia montanae Grote, 1882	Cucullia montanae	Cucullia montanae[1 individuals]
546	Noctuidae	Cuculliinae		Cucullia omissa Dod, 1916	Cucullia omissa	Cucullia omissa[2 individuals]
547	Noctuidae	Cuculliinae		Cucullia postera Guenée, 1852	Cucullia postera	Cucullia postera[8 individuals]
548	Noctuidae	Cuculliinae		Cucullia pulla (Grote, 1881)	Cucullia pulla	Cucullia pulla[2 individuals]
549	Noctuidae	Cuculliinae		Cucullia similaris Smith, 1892	Cucullia similaris	Cucullia similaris[2 individuals]
550	Noctuidae	Cuculliinae		Cucullia speyeri Lintner, 1874	Cucullia speyeri	Cucullia speyeri[6 individuals]
551	Noctuidae	Cuculliinae		Cucullia strigata (Smith, 1892)	Cucullia strigata	Cucullia strigata[4 individuals]
552	Noctuidae	Cuculliinae		Cucullia umbratica (Linnaeus, 1758)	Cucullia umbratica	Cucullia umbratica[1 individuals]
553	Noctuidae	Dilobinae		Raphia frater Grote, 1864	Raphia frater	Raphia frater[172 individuals]
554	Noctuidae	Eriopinae		Callopistria cordata (Ljungh, 1825)	Callopistria cordata	Callopistria cordata[46 individuals]
555	Noctuidae	Eriopinae		Callopistria mollissima (Guenée, 1852)	Callopistria mollissima	Callopistria mollissima[18 individuals]
556	Noctuidae	Eustrotiinae		Capis archaia L. & D. Handfield, 2006	Capis archaia	Capis archaia[10 individuals]
557	Noctuidae	Eustrotiinae		Capis curvata Grote, 1882	Capis curvata	Capis curvata[18 individuals]
558	Noctuidae	Eustrotiinae		Cobubatha dividua (Grote, 1879)	Cobubatha dividua	Cobubatha dividua[25 individuals]
559	Noctuidae	Eustrotiinae		Deltote bellicula (Hübner, 1818)	Deltote bellicula	Deltote bellicula[11 individuals]
560	Noctuidae	Eustrotiinae		Maliattha concinnimacula (Guenée, 1852)	Maliattha concinnimacula	Maliattha concinnimacula[20 individuals]
561	Noctuidae	Eustrotiinae		Maliattha synochitis (Grote & Robinson, 1868)	Maliattha synochitis	Maliattha synochitis[73 individuals]
562	Noctuidae	Eustrotiinae		Protodeltote albidula (Guenée, 1852)	Protodeltote albidula	Protodeltote albidula[203 individuals]
563	Noctuidae	Eustrotiinae		Protodeltote muscosula (Guenée, 1852)	Protodeltote muscosula	Protodeltote muscosula[67 individuals]
564	Noctuidae	Heliothinae		Eutricopis nexilis Morrison, 1875	Eutricopis nexilis	Eutricopis nexilis[8 individuals]
565	Noctuidae	Heliothinae		Helicoverpa zea (Boddie, 1850)	Helicoverpa zea	Helicoverpa zea[6 individuals]
566	Noctuidae	Heliothinae		Heliocheilus paradoxus Grote, 1865	Heliocheilus paradoxus	Heliocheilus paradoxus[20 individuals]
567	Noctuidae	Heliothinae		Heliothis acesias Felder & Rogenhofer, 1875	Heliothis acesias	Heliothis acesias[6 individuals]
568	Noctuidae	Heliothinae		Heliothis borealis (Hampson, 1903)	Heliothis borealis	Heliothis borealis[4 individuals]
569	Noctuidae	Heliothinae		Heliothis ononis (Fabricius, 1787)	Heliothis ononis	Heliothis ononis[4 individuals]
570	Noctuidae	Heliothinae		Heliothis oregonica (Hy. Edwards, 1875)	Heliothis oregonica	Heliothis oregonica[6 individuals]
571	Noctuidae	Heliothinae		Heliothis phloxiphaga Grote & Robinson, 1867	Heliothis phloxiphaga	Heliothis phloxiphaga[1 individuals]
572	Noctuidae	Heliothinae		Heliothis virescens (Fabricius, 1777)	Heliothis virescens	Heliothis virescens[11 individuals]
573	Noctuidae	Heliothinae		Melaporphyria immortua Grote, 1874	Melaporphyria immortua	Melaporphyria immortua
574	Noctuidae	Heliothinae		Protoschinia nuchalis (Grote, 1878)	Protoschinia nuchalis	Protoschinia nuchalis[1 individuals]
575	Noctuidae	Heliothinae		Pyrrhia aurantiago (Guenée, 1852)	Pyrrhia aurantiago	Pyrrhia aurantiago[2 individuals]
576	Noctuidae	Heliothinae		Pyrrhia cilisca (Guenée, 1852)	Pyrrhia cilisca	Pyrrhia cilisca[2 individuals]
577	Noctuidae	Heliothinae		Pyrrhia exprimens (Walker, 1857)	Pyrrhia exprimens	Pyrrhia exprimens[11 individuals]
578	Noctuidae	Heliothinae		Schinia acutilinea (Grote, 1878)	Schinia acutilinea	Schinia acutilinea[12 individuals]
579	Noctuidae	Heliothinae		Schinia arcigera (Guenée, 1852)	Schinia arcigera	Schinia arcigera[9 individuals]
580	Noctuidae	Heliothinae		Schinia avemensis (Dyar, 1904)	Schinia avemensis	Schinia avemensis[6 individuals]
581	Noctuidae	Heliothinae		Schinia bimatris (Harvey, 1875)	Schinia bimatris	Schinia bimatris[3 individuals]
582	Noctuidae	Heliothinae		Schinia bina (Guenée, 1852)	Schinia bina	Schinia bina group A[4 individuals]
583	Noctuidae	Heliothinae		Schinia cumatilis (Grote, 1865)	Schinia cumatilis	Schinia cumatilis[1 individuals]
584	Noctuidae	Heliothinae		Schinia florida (Guenée, 1852)	Schinia florida	Schinia florida[16 individuals]
585	Noctuidae	Heliothinae		Schinia gaurae (J.E. Smith, 1797)	Schinia gaurae	Schinia gaurae[10 individuals]
586	Noctuidae	Heliothinae		Schinia honesta (Grote, 1881)	Schinia honesta	Schinia honesta[2 individuals]
587	Noctuidae	Heliothinae		Schinia intermontana Hardwick, 1958	Schinia intermontana	Schinia intermontana[2 individuals]
588	Noctuidae	Heliothinae		Schinia jaguarina (Guenée, 1852)	Schinia jaguarina	Schinia jaguarina[10 individuals]
589	Noctuidae	Heliothinae		Schinia lucens (Morrison, 1875)	Schinia lucens	Schinia lucens[2 individuals]
590	Noctuidae	Heliothinae		Schinia lynx (Guenée, 1852)	Schinia lynx	Schinia lynx[18 individuals]
591	Noctuidae	Heliothinae		Schinia meadi (Grote, 1873)	Schinia meadi	Schinia meadi[1 individuals]
592	Noctuidae	Heliothinae		Schinia mortua (Grote, 1865)	Schinia mortua	Schinia mortua[8 individuals]
593	Noctuidae	Heliothinae		Schinia nundina (Drury, 1773)	Schinia nundina	Schinia nundina[7 individuals]
594	Noctuidae	Heliothinae		Schinia obscurata Strecker, 1898	Schinia obscurata	Schinia obscurata[2 individuals]
595	Noctuidae	Heliothinae		Schinia persimilis (Grote, 1873)	Schinia persimilis	Schinia persimilis[2 individuals]
596	Noctuidae	Heliothinae		Schinia rivulosa (Guenée, 1852)	Schinia rivulosa	Schinia rivulosa[1 individuals]
597	Noctuidae	Heliothinae		Schinia roseitincta (Harvey, 1875)	Schinia roseitincta	Schinia roseitincta[4 individuals]
598	Noctuidae	Heliothinae		Schinia sanguinea (Geyer, 1832)	Schinia sanguinea	Schinia sanguinea[7 individuals]
599	Noctuidae	Heliothinae		Schinia septentrionalis (Walker, 1858)	Schinia septentrionalis	Schinia septentrionalis[11 individuals]
600	Noctuidae	Heliothinae		Schinia sexata (Smith, 1906)	Schinia sexata	Schinia sexata[3 individuals]
601	Noctuidae	Heliothinae		Schinia suetus (Grote, 1873)	Schinia suetus	Schinia suetus[6 individuals]
602	Noctuidae	Heliothinae		Schinia thoreaui (Grote & Robinson, 1870)	Schinia thoreaui	Schinia thoreaui[12 individuals]
603	Noctuidae	Heliothinae		Schinia trifascia Hübner, 1818	Schinia trifascia	Schinia trifascia[4 individuals]
604	Noctuidae	Heliothinae		Schinia verna Hardwick, 1983	Schinia verna	Schinia verna[2 individuals]
605	Noctuidae	Heliothinae		Schinia villosa (Grote, 1864)	Schinia villosa	Schinia villosa[5 individuals]
606	Noctuidae	Heliothinae		Schinia walsinghami (Hy. Edwards, 1881)	Schinia walsinghami	Schinia walsinghami[29 individuals]
607	Noctuidae	Noctuinae	Actinotiini	Alastria chico Lafontaine & Troubridge, 2004	Alastria chico	Alastria chico[1 individuals]
608	Noctuidae	Noctuinae	Actinotiini	Iodopepla u-album (Guenée, 1852)	Iodopepla u-album	Iodopepla u-album[1 individuals]
609	Noctuidae	Noctuinae	Actinotiini	Nedra ramosula (Guenée, 1852)	Nedra ramosula	Nedra ramosula[24 individuals]
610	Noctuidae	Noctuinae	Apameini	Achatodes zeae (Harris, 1841)	Achatodes zeae	Achatodes zeae[3 individuals]
611	Noctuidae	Noctuinae	Apameini	Amphipoea americana (Speyer, 1875)	Amphipoea americana	Amphipoea americana[14 individuals]
612	Noctuidae	Noctuinae	Apameini	Amphipoea interoceanica (Smith, 1899)	Amphipoea interoceanica	Amphipoea interoceanica[2 individuals]
613	Noctuidae	Noctuinae	Apameini	Apamea acera (Smith, 1900)	Apamea acera	Apamea acera[2 individuals]
614	Noctuidae	Noctuinae	Apameini	Apamea alia (Guenée, 1852)	Apamea alia	Apamea alia[26 individuals]
615	Noctuidae	Noctuinae	Apameini	Apamea amputatrix (Fitch, 1857)	Apamea amputatrix	Apamea amputatrix[107 individuals]
616	Noctuidae	Noctuinae	Apameini	Apamea antennata (Smith, 1891)	Apamea antennata	Apamea antennata[33 individuals]
617	Noctuidae	Noctuinae	Apameini	Apamea apamiformis (Guenée, 1852)	Apamea apamiformis	Apamea apamiformis[2 individuals]
618	Noctuidae	Noctuinae	Apameini	Apamea atriclava (Barnes & McDunnough, 1913)	Apamea atriclava	Apamea atriclava[3 individuals]
619	Noctuidae	Noctuinae	Apameini	Apamea burgessi (Morrison, 1874)	Apamea burgessi	Apamea burgessi[12 individuals]
620	Noctuidae	Noctuinae	Apameini	Apamea cariosa (Guenée, 1852)	Apamea cariosa	Apamea cariosa[4 individuals]
621	Noctuidae	Noctuinae	Apameini	Apamea centralis (Smith, 1891)	Apamea centralis	Apamea centralis[12 individuals]
622	Noctuidae	Noctuinae	Apameini	Apamea cinefacta (Grote, 1881)	Apamea cinefacta	Apamea cinefacta[1 individuals]
623	Noctuidae	Noctuinae	Apameini	Apamea cogitata (Smith, 1891)	Apamea cogitata	Apamea cogitata[138 individuals]
624	Noctuidae	Noctuinae	Apameini	Apamea commoda (Walker, 1857)	Apamea commoda	Apamea commoda[70 individuals]
625	Noctuidae	Noctuinae	Apameini	Apamea contradicta (Smith, 1895)	Apamea contradicta	Apamea contradicta[8 individuals]
626	Noctuidae	Noctuinae	Apameini	Apamea cristata (Grote, 1878)	Apamea cristata	Apamea cristata[3 individuals]
627	Noctuidae	Noctuinae	Apameini	Apamea cuculliformis (Grote, 1875)	Apamea cuculliformis	Apamea cuculliformis[8 individuals]
628	Noctuidae	Noctuinae	Apameini	Apamea devastator (Brace, 1819)	Apamea devastator	Apamea devastator[127 individuals]
629	Noctuidae	Noctuinae	Apameini	Apamea dubitans (Walker, 1856)	Apamea dubitans	Apamea dubitans[9 individuals]
630	Noctuidae	Noctuinae	Apameini	Apamea helva (Grote, 1875)	Apamea helva	Apamea helva[5 individuals]
631	Noctuidae	Noctuinae	Apameini	Apamea impulsa (Guenée, 1852)	Apamea impulsa	Apamea impulsa[7 individuals]
632	Noctuidae	Noctuinae	Apameini	Apamea indocilis (Walker, 1856)	Apamea indocilis	Apamea indocilis[8 individuals]
633	Noctuidae	Noctuinae	Apameini	Apamea inebriata Ferguson, 1977	Apamea inebriata	Apamea inebriata[1 individuals]
634	Noctuidae	Noctuinae	Apameini	Apamea inficita (Walker, 1857)	Apamea inficita	Apamea inficita[39 individuals]
635	Noctuidae	Noctuinae	Apameini	Apamea inordinata (Morrison, 1875)	Apamea inordinata	Apamea inordinata[24 individuals]
636	Noctuidae	Noctuinae	Apameini	Apamea lignicolora (Guenée, 1852)	Apamea lignicolora	Apamea lignicolora[29 individuals]
637	Noctuidae	Noctuinae	Apameini	Apamea lintneri (Grote, 1873)	Apamea lintneri	Apamea lintneri[4 individuals]
638	Noctuidae	Noctuinae	Apameini	Apamea longula (Grote, 1879)	Apamea longula	Apamea longula[36 individuals]
639	Noctuidae	Noctuinae	Apameini	Apamea lutosa (Andrews, 1877)	Apamea lutosa	Apamea lutosa[5 individuals]
640	Noctuidae	Noctuinae	Apameini	Apamea maxima (Dyar, 1904)	Apamea maxima	Apamea maxima[8 individuals]
641	Noctuidae	Noctuinae	Apameini	Apamea nigrior (Smith, 1891)	Apamea nigrior	Apamea nigrior[4 individuals]
642	Noctuidae	Noctuinae	Apameini	Apamea niveivenosa (Grote, 1879)	Apamea niveivenosa	Apamea niveivenosa[9 individuals]
643	Noctuidae	Noctuinae	Apameini	Apamea occidens (Grote, 1878)	Apamea occidens	Apamea occidens[3 individuals]
644	Noctuidae	Noctuinae	Apameini	Apamea plutonia (Grote, 1883)	Apamea plutonia	Apamea plutonia[6 individuals]
645	Noctuidae	Noctuinae	Apameini	Apamea remissa (Hübner, [1809])	Apamea remissa	Apamea remissa[1 individuals]
646	Noctuidae	Noctuinae	Apameini	Apamea scoparia Mikkola Mustelin & Lafontaine, 2000	Apamea scoparia	Apamea scoparia[46 individuals]
647	Noctuidae	Noctuinae	Apameini	Apamea sora (Smith, 1903)	Apamea sora	Apamea sora[47 individuals]
648	Noctuidae	Noctuinae	Apameini	Apamea sordens (Hufnagel, 1766)	Apamea sordens	Apamea sordens[69 individuals]
649	Noctuidae	Noctuinae	Apameini	Apamea spaldingi (Smith, 1909)	Apamea spaldingi	Apamea spaldingi[13 individuals]
650	Noctuidae	Noctuinae	Apameini	Apamea unanimis (Hübner, [1813])	Apamea unanimis	Apamea unanimis[35 individuals]
651	Noctuidae	Noctuinae	Apameini	Apamea unita (Smith, 1904)	Apamea unita	Apamea unita[2 individuals]
652	Noctuidae	Noctuinae	Apameini	Apamea verbascoides (Guenée, 1852)	Apamea verbascoides	Apamea verbascoides[7 individuals]
653	Noctuidae	Noctuinae	Apameini	Apamea vulgaris (Grote & Robinson, 1866)	Apamea vulgaris	Apamea vulgaris[2 individuals]
654	Noctuidae	Noctuinae	Apameini	Apamea vultuosa (Grote, 1875)	Apamea vultuosa	Apamea vultuosa[11 individuals]
655	Noctuidae	Noctuinae	Apameini	Apamea zeta (Treitschke, 1825)	Apamea zeta	Apamea zeta[80 individuals]
656	Noctuidae	Noctuinae	Apameini	Benjaminiola colorada (Smith, 1900)	Benjaminiola colorada	Benjaminiola colorada[1 individuals]
657	Noctuidae	Noctuinae	Apameini	Capsula laeta (Morrison, 1875)	Capsula laeta	Capsula laeta[3 individuals]
658	Noctuidae	Noctuinae	Apameini	Capsula oblonga (Grote, 1882)	Capsula oblonga	Capsula oblonga[15 individuals]
659	Noctuidae	Noctuinae	Apameini	Capsula subflava (Grote, 1882)	Capsula subflava	Capsula subflava[9 individuals]
660	Noctuidae	Noctuinae	Apameini	Eremobina claudens (Walker, 1857)	Eremobina claudens	Eremobina claudens[7 individuals]
661	Noctuidae	Noctuinae	Apameini	Eremobina leucoscelis (Grote, 1874)	Eremobina leucoscelis	Eremobina leucoscelis[8 individuals]
662	Noctuidae	Noctuinae	Apameini	Helotropha reniformis (Grote, 1874)	Helotropha reniformis	Helotropha reniformis[12 individuals]
663	Noctuidae	Noctuinae	Apameini	Hydraecia columbia (Barnes & Benjamin, 1924)	Hydraecia columbia	Hydraecia columbia[2 individuals]
664	Noctuidae	Noctuinae	Apameini	Hydraecia immanis (Guenée, 1852)	Hydraecia immanis	Hydraecia immanis[1 individuals]
665	Noctuidae	Noctuinae	Apameini	Hydraecia micacea (Esper, 1789)	Hydraecia micacea	Hydraecia micacea[8 individuals]
666	Noctuidae	Noctuinae	Apameini	Hydraecia pallescens (Smith, 1899)	Hydraecia pallescens	Hydraecia pallescens[2 individuals]
667	Noctuidae	Noctuinae	Apameini	Hydraecia perobliqua (Hampson, 1910)	Hydraecia perobliqua	Hydraecia perobliqua[2 individuals]
668	Noctuidae	Noctuinae	Apameini	Hydraecia stramentosa (Guenée, 1852)	Hydraecia stramentosa	Hydraecia stramentosa[2 individuals]
669	Noctuidae	Noctuinae	Apameini	Hypocoena basistriga (McDunnough, 1933)	Hypocoena basistriga	Hypocoena basistriga[5 individuals]
670	Noctuidae	Noctuinae	Apameini	Hypocoena inquinata (Guenée, 1852)	Hypocoena inquinata	Hypocoena inquinata[13 individuals]
671	Noctuidae	Noctuinae	Apameini	Hypocoena rufostrigata (Packard, 1867)	Hypocoena rufostrigata	Hypocoena rufostrigata[6 individuals]
672	Noctuidae	Noctuinae	Apameini	Lateroligia ophiogramma (Esper, 1793)	Lateroligia ophiogramma	Lateroligia ophiogramma[35 individuals]
673	Noctuidae	Noctuinae	Apameini	Lemmeria digitalis (Grote, 1882)	Lemmeria digitalis	Lemmeria digitalis[3 individuals]
674	Noctuidae	Noctuinae	Apameini	Loscopia velata (Walker, 1865)	Loscopia velata	Loscopia velata[16 individuals]
675	Noctuidae	Noctuinae	Apameini	Macronoctua onusta Grote, 1874	Macronoctua onusta	Macronoctua onusta[7 individuals]
676	Noctuidae	Noctuinae	Apameini	Melanapamea mixta (Grote, 1881)	Melanapamea mixta	Melanapamea mixta[1 individuals]
677	Noctuidae	Noctuinae	Apameini	Meropleon ambifusca (Newman, 1948)	Meropleon ambifusca	Meropleon ambifusca[7 individuals]
678	Noctuidae	Noctuinae	Apameini	Meropleon diversicolor (Morrison, 1874)	Meropleon diversicolor	Meropleon diversicolor[2 individuals]
679	Noctuidae	Noctuinae	Apameini	Mesapamea fractilinea (Grote, 1874)	Mesapamea fractilinea	Mesapamea fractilinea[9 individuals]
680	Noctuidae	Noctuinae	Apameini	Neoligia albirena Troubridge & Lafontaine, 2002	Neoligia albirena	Neoligia albirena[3 individuals]
681	Noctuidae	Noctuinae	Apameini	Neoligia atlantica Troubridge & Lafontaine, 2002	Neoligia atlantica	Neoligia atlantica[2 individuals]
682	Noctuidae	Noctuinae	Apameini	Neoligia canadensis Troubridge & Lafontaine, 2002	Neoligia canadensis	Neoligia canadensis[5 individuals]
683	Noctuidae	Noctuinae	Apameini	Neoligia crytora (Franclemont, 1950)	Neoligia crytora	Neoligia crytora[3 individuals]
684	Noctuidae	Noctuinae	Apameini	Neoligia exhausta (Smith, 1903)	Neoligia exhausta	Neoligia exhausta[21 individuals]
685	Noctuidae	Noctuinae	Apameini	Neoligia invenusta Troubridge & Lafontaine, 2002	Neoligia invenusta	Neoligia invenusta[14 individuals]
686	Noctuidae	Noctuinae	Apameini	Neoligia lancea Troubridge & Lafontaine, 2002	Neoligia lancea	Neoligia lancea[2 individuals]
687	Noctuidae	Noctuinae	Apameini	Neoligia lillooet Troubridge & Lafontaine, 2002	Neoligia lillooet	Neoligia lillooet[8 individuals]
688	Noctuidae	Noctuinae	Apameini	Neoligia semicana (Walker, 1865)	Neoligia semicana	Neoligia semicana[2 individuals]
689	Noctuidae	Noctuinae	Apameini	Neoligia subjuncta (Smith, 1898)	Neoligia subjuncta	Neoligia subjuncta[49 individuals]
690	Noctuidae	Noctuinae	Apameini	Neoligia tonsa (Grote, 1880)	Neoligia tonsa	Neoligia tonsa[18 individuals]
691	Noctuidae	Noctuinae	Apameini	Oligia bridghamii (Grote & Robinson, 1866)	Oligia bridghamii	Oligia bridghamii[5 individuals]
692	Noctuidae	Noctuinae	Apameini	Oligia chlorostigma (Harvey, 1876)	Oligia chlorostigma	Oligia chlorostigma[3 individuals]
693	Noctuidae	Noctuinae	Apameini	Oligia divesta (Grote, 1874)	Oligia divesta	Oligia divesta[25 individuals]
694	Noctuidae	Noctuinae	Apameini	Oligia egens (Walker, [1857])	Oligia egens	Oligia egens[4 individuals]
695	Noctuidae	Noctuinae	Apameini	Oligia minuscula (Morrison, 1875)	Oligia minuscula	Oligia minuscula[26 individuals]
696	Noctuidae	Noctuinae	Apameini	Oligia modica (Guenée, 1852)	Oligia modica	Oligia modica[3 individuals]
697	Noctuidae	Noctuinae	Apameini	Oligia obtusa (Smith, 1902)	Oligia obtusa	Oligia obtusa[5 individuals]
698	Noctuidae	Noctuinae	Apameini	Oligia rampartensis Barnes & Benjamin, 1923	Oligia rampartensis	Oligia rampartensis[1 individuals]
699	Noctuidae	Noctuinae	Apameini	Oligia strigilis (Grote, 1875)	Oligia strigilis	Oligia strigilis[2 individuals]
700	Noctuidae	Noctuinae	Apameini	Oligia tusa (Grote, 1878)	Oligia tusa	Oligia tusa[3 individuals]
701	Noctuidae	Noctuinae	Apameini	Oligia violacea (Grote, 1881)	Oligia violacea	Oligia violacea[1 individuals]
702	Noctuidae	Noctuinae	Apameini	Papaipema aerata (Lyman, 1901)	Papaipema aerata	Papaipema aerata
703	Noctuidae	Noctuinae	Apameini	Papaipema appassionata (Harvey, 1876)	Papaipema appassionata	Papaipema appassionata[3 individuals]
704	Noctuidae	Noctuinae	Apameini	Papaipema arctivorens Hampson, 1910	Papaipema arctivorens	Papaipema arctivorens[13 individuals]
705	Noctuidae	Noctuinae	Apameini	Papaipema aweme (Lyman, 1908)	Papaipema aweme	Papaipema aweme[1 individuals]
706	Noctuidae	Noctuinae	Apameini	Papaipema baptisiae (Bird, 1902)	Papaipema baptisiae	Papaipema baptisiae[5 individuals]
707	Noctuidae	Noctuinae	Apameini	Papaipema birdi (Dyar, 1908)	Papaipema birdi	Papaipema birdi[7 individuals]
708	Noctuidae	Noctuinae	Apameini	Papaipema cataphracta (Grote, 1864)	Papaipema cataphracta	Papaipema cataphracta[1 individuals]
709	Noctuidae	Noctuinae	Apameini	Papaipema cerina (Grote, 1874)	Papaipema cerina	Papaipema cerina[1 individuals]
710	Noctuidae	Noctuinae	Apameini	Papaipema cerussata (Grote, 1864)	Papaipema cerussata	Papaipema cerussata[8 individuals]
711	Noctuidae	Noctuinae	Apameini	Papaipema circumlucens (Smith, 1899)	Papaipema circumlucens	Papaipema circumlucens[1 individuals]
712	Noctuidae	Noctuinae	Apameini	Papaipema eupatorii (Lyman, 1905)	Papaipema eupatorii	Papaipema eupatorii[4 individuals]
713	Noctuidae	Noctuinae	Apameini	Papaipema furcata (Smith, 1899)	Papaipema furcata	Papaipema furcata[1 individuals]
714	Noctuidae	Noctuinae	Apameini	Papaipema harrisii (Grote, 1881)	Papaipema harrisii	Papaipema harrisii[9 individuals]
715	Noctuidae	Noctuinae	Apameini	Papaipema impecuniosa (Grote, 1881)	Papaipema impecuniosa	Papaipema impecuniosa[5 individuals]
716	Noctuidae	Noctuinae	Apameini	Papaipema inquaesita (Grote & Robinson, 1868)	Papaipema inquaesita	Papaipema inquaesita[13 individuals]
717	Noctuidae	Noctuinae	Apameini	Papaipema insulidens (Bird, 1902)	Papaipema insulidens	Papaipema insulidens[4 individuals]
718	Noctuidae	Noctuinae	Apameini	Papaipema leucostigma (Harris, 1841)	Papaipema leucostigma	Papaipema leucostigma[12 individuals]
719	Noctuidae	Noctuinae	Apameini	Papaipema lysimachiae Bird, 1914	Papaipema lysimachiae	Papaipema lysimachiae[2 individuals]
720	Noctuidae	Noctuinae	Apameini	Papaipema nebris (Guenée, 1852)	Papaipema nebris	Papaipema nebris[16 individuals]
721	Noctuidae	Noctuinae	Apameini	Papaipema necopina (Grote, 1876)	Papaipema necopina	Papaipema necopina[1 individuals]
722	Noctuidae	Noctuinae	Apameini	Papaipema nelita (Strecker, 1898)	Papaipema nelita	Papaipema nelita[14 individuals]
723	Noctuidae	Noctuinae	Apameini	Papaipema nepheleptena (Dyar, 1908)	Papaipema nepheleptena	Papaipema nepheleptena[4 individuals]
724	Noctuidae	Noctuinae	Apameini	Papaipema pertincta Dyar, 1920	Papaipema pertincta	Papaipema pertincta
725	Noctuidae	Noctuinae	Apameini	Papaipema pterisii Bird, 1907	Papaipema pterisii	Papaipema pterisii[13 individuals]
726	Noctuidae	Noctuinae	Apameini	Papaipema rigida (Grote, 1877)	Papaipema rigida	Papaipema rigida[3 individuals]
727	Noctuidae	Noctuinae	Apameini	Papaipema speciosissima (Grote & Robinson, 1868)	Papaipema speciosissima	Papaipema speciosissima[1 individuals]
728	Noctuidae	Noctuinae	Apameini	Papaipema unimoda (Smith, 1894)	Papaipema unimoda	Papaipema unimoda[12 individuals]
729	Noctuidae	Noctuinae	Apameini	“Photedes” defecta (Grote, 1874)	Photedes defecta	Photedes defecta[9 individuals]
730	Noctuidae	Noctuinae	Apameini	Photedes didonea (Smith, 1894)	Photedes didonea	Photedes didonea[4 individuals]
731	Noctuidae	Noctuinae	Apameini	“Photedes” enervata (Guenée, 1852)	Photedes enervata	Photedes enervata[1 individuals]
732	Noctuidae	Noctuinae	Apameini	Photedes includens (Walker, [1858])	Photedes includens	Photedes includens[9 individuals]
733	Noctuidae	Noctuinae	Apameini	Photedes inops (Grote, 1881)	Photedes inops	Photedes inops[6 individuals]
734	Noctuidae	Noctuinae	Apameini	Photedes panatela (Smith, 1904)	Photedes panatela	Photedes panatela[11 individuals]
735	Noctuidae	Noctuinae	Apameini	Resapamea mammuthus Crabo, 2013	Resapamea mammuthus	Resapamea mammuthus[1 individuals]
736	Noctuidae	Noctuinae	Apameini	Resapamea passer (Guenée, 1852)	Resapamea passer	Resapamea passer[20 individuals]
737	Noctuidae	Noctuinae	Apameini	“Resapamea” stipata (Morrison, 1875)	Resapamea stipata	Resapamea stipata[16 individuals]
738	Noctuidae	Noctuinae	Apameini	Resapamea venosa (Smith, 1903)	Resapamea venosa	Resapamea venosa[1 individuals]
739	Noctuidae	Noctuinae	Apameini	Rhizedra lutosa (Hübner, [1803])	Rhizedra lutosa	Rhizedra lutosa[7 individuals]
740	Noctuidae	Noctuinae	Apameini	Xylomoia chagnoni Barnes & McDunnough, 1917	Xylomoia chagnoni	Xylomoia chagnoni[4 individuals]
741	Noctuidae	Noctuinae	Apameini	Xylomoia indirecta (Grote, 1875)	Xylomoia indirecta	Xylomoia indirecta[23 individuals]
742	Noctuidae	Noctuinae	Arzamini	Bellura gortynoides Walker, 1865	Bellura gortynoides	Bellura gortynoides[1 individuals]
743	Noctuidae	Noctuinae	Arzamini	Bellura obliqua (Walker, 1865)	Bellura obliqua	Bellura obliqua[41 individuals]
744	Noctuidae	Noctuinae	Arzamini	Bellura vulnifica (Grote, 1873)	Bellura vulnifica	Bellura vulnifica[5 individuals]
745	Noctuidae	Noctuinae	Caradrinini	Athetis tarda (Guenée, 1852)	Athetis tarda	Athetis tarda[7 individuals]
746	Noctuidae	Noctuinae	Caradrinini	Caradrina camina (Smith, 1894)	Caradrina camina	Caradrina camina[15 individuals]
747	Noctuidae	Noctuinae	Caradrinini	Caradrina meralis (Morrison, 1875)	Caradrina meralis	Caradrina meralis[68 individuals]
748	Noctuidae	Noctuinae	Caradrinini	Caradrina montana (Bremer, 1861)	Caradrina montana	Caradrina montana[75 individuals]
749	Noctuidae	Noctuinae	Caradrinini	Caradrina morpheus (Hufnagel, 1766)	Caradrina morpheus	Caradrina morpheus[47 individuals]
750	Noctuidae	Noctuinae	Caradrinini	Caradrina multifera (Walker, [1857])	Caradrina multifera	Caradrina multifera[6 individuals]
751	Noctuidae	Noctuinae	Caradrinini	Magusa divaricata (Grote, 1874)	Magusa divaricata	Magusa divaricata[2 individuals]
752	Noctuidae	Noctuinae	Caradrinini	Magusa orbifera (Walker, 1857)	Magusa orbifera	Magusa orbifera[1 individuals]
753	Noctuidae	Noctuinae	Caradrinini	Protoperigea anotha (Dyar, 1904)	Protoperigea anotha	Protoperigea anotha[4 individuals]
754	Noctuidae	Noctuinae	Caradrinini	Protoperigea posticata (Harvey, 1875)	Protoperigea posticata	Protoperigea posticata[2 individuals]
755	Noctuidae	Noctuinae	Caradrinini	Proxenus mendosa McDunnough, 1927	Proxenus mendosa	Proxenus mendosa[12 individuals]
756	Noctuidae	Noctuinae	Caradrinini	Proxenus mindara Barnes & McDunnough, 1913	Proxenus mindara	Proxenus mindara[20 individuals]
757	Noctuidae	Noctuinae	Caradrinini	Proxenus miranda (Grote, 1873)	Proxenus miranda	Proxenus miranda[64 individuals]
758	Noctuidae	Noctuinae	Caradrinini	Trachea delicata (Grote, 1874)	Trachea delicata	Trachea delicata[3 individuals]
759	Noctuidae	Noctuinae	Dypterygiini	Dypterygia rozmani Berio, 1974	Dypterygia rozmani	Dypterygia rozmani[3 individuals]
760	Noctuidae	Noctuinae	Elaphriini	Chytonix palliatricula (Guenée, 1852)	Chytonix palliatricula	Chytonix palliatricula[26 individuals]
761	Noctuidae	Noctuinae	Elaphriini	Chytonix sensilis Grote, 1881	Chytonix sensilis	Chytonix sensilis[3 individuals]
762	Noctuidae	Noctuinae	Elaphriini	Elaphria alapallida Pogue & Sullivan, 2003	Elaphria alapallida	Elaphria alapallida[57 individuals]
763	Noctuidae	Noctuinae	Elaphriini	Elaphria chalcedonia (Hübner, [1808])	Elaphria chalcedonia	Elaphria chalcedonia[30 individuals]
764	Noctuidae	Noctuinae	Elaphriini	Elaphria georgei (Moore & Rawson, 1939)	Elaphria georgei	Elaphria georgei[13 individuals]
765	Noctuidae	Noctuinae	Elaphriini	Elaphria grata Hübner, 1818	Elaphria grata	Elaphria grata[7 individuals]
766	Noctuidae	Noctuinae	Elaphriini	Elaphria versicolor (Grote, 1875)	Elaphria versicolor	Elaphria versicolor[51 individuals]
767	Noctuidae	Noctuinae	Elaphriini	Galgula partita Guenée, 1852	Galgula partita	Galgula partita[13 individuals]
768	Noctuidae	Noctuinae	Eriopygini	Anhimella contrahens (Walker, 1860)	Anhimella contrahens	Anhimella contrahens[3 individuals]
769	Noctuidae	Noctuinae	Eriopygini	Anhimella pacifica McDunnough, 1943	Anhimella pacifica	Anhimella pacifica[5 individuals]
770	Noctuidae	Noctuinae	Eriopygini	Anhimella perbrunnea (Grote, 1879)	Anhimella perbrunnea	Anhimella perbrunnea[8 individuals]
771	Noctuidae	Noctuinae	Eriopygini	Homorthodes carneola McDunnough, 1943	Homorthodes carneola	Homorthodes carneola[3 individuals]
772	Noctuidae	Noctuinae	Eriopygini	Homorthodes communis (Dyar, 1904)	Homorthodes communis	Homorthodes communis[20 individuals]
773	Noctuidae	Noctuinae	Eriopygini	Homorthodes discreta (Barnes & McDunnough, 1916)	Homorthodes discreta	Homorthodes discreta[11 individuals]
774	Noctuidae	Noctuinae	Eriopygini	Homorthodes fractura (Smith, 1906)	Homorthodes fractura	Homorthodes fractura mecrona[16 individuals]
775	Noctuidae	Noctuinae	Eriopygini	Homorthodes furfurata (Grote, 1875)	Homorthodes furfurata	Homorthodes furfurata[132 individuals]
776	Noctuidae	Noctuinae	Eriopygini	Homorthodes hanhami (Barnes & McDunnough, 1911)	Homorthodes hanhami	Homorthodes hanhami[27 individuals]
777	Noctuidae	Noctuinae	Eriopygini	Hydroeciodes serrata (Grote, 1880)	Hydroeciodes serrata	Hydroeciodes serrata[2 individuals]
778	Noctuidae	Noctuinae	Eriopygini	Lacinipolia anguina (Grote, 1881)	Lacinipolia anguina	Lacinipolia anguina[26 individuals]
779	Noctuidae	Noctuinae	Eriopygini	Lacinipolia comis (Grote, 1876)	Lacinipolia comis	Lacinipolia comis[20 individuals]
780	Noctuidae	Noctuinae	Eriopygini	Lacinipolia cuneata (Grote, 1873)	Lacinipolia cuneata	Lacinipolia cuneata[16 individuals]
781	Noctuidae	Noctuinae	Eriopygini	Lacinipolia davena (Smith, 1901)	Lacinipolia davena	Lacinipolia davena[30 individuals]
782	Noctuidae	Noctuinae	Eriopygini	Lacinipolia implicata McDunnough, 1937	Lacinipolia implicata	Lacinipolia implicata[2 individuals]
783	Noctuidae	Noctuinae	Eriopygini	Lacinipolia longiclava (Smith, 1891)	Lacinipolia longiclava	Lacinipolia longiclava[4 individuals]
784	Noctuidae	Noctuinae	Eriopygini	Lacinipolia lorea (Guenée, 1852)	Lacinipolia lorea	Lacinipolia lorea[72 individuals]
785	Noctuidae	Noctuinae	Eriopygini	Lacinipolia lustralis (Grote, 1875)	Lacinipolia lustralis	Lacinipolia lustralis[61 individuals]
786	Noctuidae	Noctuinae	Eriopygini	Lacinipolia meditata (Grote, 1873)	Lacinipolia meditata	Lacinipolia meditata[38 individuals]
787	Noctuidae	Noctuinae	Eriopygini	Lacinipolia naevia (Smith, 1898)	Lacinipolia naevia	Lacinipolia naevia[1 individuals]
788	Noctuidae	Noctuinae	Eriopygini	Lacinipolia olivacea (Morrison, 1874)	Lacinipolia olivacea	Lacinipolia olivacea[154 individuals]
789	Noctuidae	Noctuinae	Eriopygini	Lacinipolia patalis (Grote, 1873)	Lacinipolia patalis	Lacinipolia patalis[16 individuals]
790	Noctuidae	Noctuinae	Eriopygini	Lacinipolia pensilis (Grote, 1874)	Lacinipolia pensilis	Lacinipolia pensilis[74 individuals]
791	Noctuidae	Noctuinae	Eriopygini	Lacinipolia rectilinea (Smith, 1888)	Lacinipolia rectilinea	Lacinipolia rectilinea[2 individuals]
792	Noctuidae	Noctuinae	Eriopygini	Lacinipolia renigera (Stephens, 1829)	Lacinipolia renigera	Lacinipolia renigera[124 individuals]
793	Noctuidae	Noctuinae	Eriopygini	Lacinipolia stenotis (Hampson, 1905)	Lacinipolia stenotis	Lacinipolia stenotis[4 individuals]
794	Noctuidae	Noctuinae	Eriopygini	Lacinipolia stricta (Walker, 1865)	Lacinipolia stricta	Lacinipolia stricta[26 individuals]
795	Noctuidae	Noctuinae	Eriopygini	Lacinipolia strigicollis (Wallengren, 1860)	Lacinipolia strigicollis	Lacinipolia strigicollis[32 individuals]
796	Noctuidae	Noctuinae	Eriopygini	Lacinipolia vicina (Grote, 1874)	Lacinipolia vicina	Lacinipolia vicina[54 individuals]
797	Noctuidae	Noctuinae	Eriopygini	Lasionycta anthracina Crabo & Lafontaine, 2009	Lasionycta anthracina	Lasionycta anthracina[4 individuals]
798	Noctuidae	Noctuinae	Eriopygini	Lasionycta brunnea Crabo & Lafontaine, 2009	Lasionycta brunnea	Lasionycta brunnea[9 individuals]
799	Noctuidae	Noctuinae	Eriopygini	Lasionycta caesia Crabo & Lafontaine, 2009	Lasionycta caesia	Lasionycta caesia[3 individuals]
800	Noctuidae	Noctuinae	Eriopygini	Lasionycta carolynae Crabo, 2009	Lasionycta carolynae	Lasionycta carolynae[3 individuals]
801	Noctuidae	Noctuinae	Eriopygini	Lasionycta coracina Crabo & Lafontaine, 2009	Lasionycta coracina	Lasionycta coracina[2 individuals]
802	Noctuidae	Noctuinae	Eriopygini	Lasionycta fergusoni Crabo & Lafontaine, 2009	Lasionycta fergusoni	Lasionycta fergusoni[5 individuals]
803	Noctuidae	Noctuinae	Eriopygini	Lasionycta flanda (Smith, 1908)	Lasionycta flanda	Lasionycta flanda[1 individuals]
804	Noctuidae	Noctuinae	Eriopygini	Lasionycta frigida Crabo & Lafontaine, 2009	Lasionycta frigida	Lasionycta frigida[2 individuals]
805	Noctuidae	Noctuinae	Eriopygini	Lasionycta gelida Crabo & Lafontaine, 2009	Lasionycta gelida	Lasionycta gelida[2 individuals]
806	Noctuidae	Noctuinae	Eriopygini	Lasionycta haida Crabo & Lafontaine, 2009	Lasionycta haida	Lasionycta haida[6 individuals]
807	Noctuidae	Noctuinae	Eriopygini	Lasionycta illima Crabo & Lafontaine, 2009	Lasionycta illima	Lasionycta illima
808	Noctuidae	Noctuinae	Eriopygini	Lasionycta impingens (Walker, 1857)	Lasionycta impingens	Lasionycta impingens[5 individuals]
809	Noctuidae	Noctuinae	Eriopygini	Lasionycta lagganata (Barnes & Benjamin, 1924)	Lasionycta lagganata	Lasionycta lagganata[4 individuals]
810	Noctuidae	Noctuinae	Eriopygini	Lasionycta leucocycla (Staudinger, 1857)	Lasionycta leucocycla	Lasionycta leucocycla[48 individuals]
811	Noctuidae	Noctuinae	Eriopygini	Lasionycta luteola (Smith, 1893)	Lasionycta luteola	Lasionycta luteola[4 individuals]
812	Noctuidae	Noctuinae	Eriopygini	Lasionycta macleani (McDunnough, 1927)	Lasionycta macleani	Lasionycta macleani
813	Noctuidae	Noctuinae	Eriopygini	Lasionycta mutilata (Smith, 1898)	Lasionycta mutilata	Lasionycta mutilata[97 individuals]
814	Noctuidae	Noctuinae	Eriopygini	Lasionycta perplexa (Smith, [1888])	Lasionycta perplexa	Lasionycta perplexa[51 individuals]
815	Noctuidae	Noctuinae	Eriopygini	Lasionycta perplexella Crabo & Lafontaine, 2009	Lasionycta perplexella	Lasionycta perplexella[6 individuals]
816	Noctuidae	Noctuinae	Eriopygini	Lasionycta phaea (Hampson, 1905)	Lasionycta phaea	Lasionycta phaea[1 individuals]
817	Noctuidae	Noctuinae	Eriopygini	Lasionycta phoca (Möschler, 1864)	Lasionycta phoca	Lasionycta phoca[12 individuals]
818	Noctuidae	Noctuinae	Eriopygini	Lasionycta poca (Barnes & Benjamin, 1923)	Lasionycta poca	Lasionycta poca[5 individuals]
819	Noctuidae	Noctuinae	Eriopygini	Lasionycta promulsa (Morrison, 1875)	Lasionycta promulsa	Lasionycta promulsa[28 individuals]
820	Noctuidae	Noctuinae	Eriopygini	Lasionycta pulverea Crabo & Lafontaine, 2009	Lasionycta pulverea	Lasionycta pulverea[6 individuals]
821	Noctuidae	Noctuinae	Eriopygini	Lasionycta quadrilunata (Grote, 1874)	Lasionycta quadrilunata	Lasionycta quadrilunata[7 individuals]
822	Noctuidae	Noctuinae	Eriopygini	Lasionycta secedens (Walker, [1858])	Lasionycta secedens	Lasionycta secedens[31 individuals]
823	Noctuidae	Noctuinae	Eriopygini	Lasionycta silacea Crabo & Lafontaine, 2009	Lasionycta silacea	Lasionycta silacea[4 individuals]
824	Noctuidae	Noctuinae	Eriopygini	Lasionycta skraelingia (Herrich-Schäffer, 1852)	Lasionycta skraelingia	Lasionycta skraelingia[2 individuals]
825	Noctuidae	Noctuinae	Eriopygini	Lasionycta staudingeri (Aurivillius, 1891)	Lasionycta staudingeri	Lasionycta staudingeri[5 individuals]
826	Noctuidae	Noctuinae	Eriopygini	Lasionycta subdita (Möschler, 1860)	Lasionycta subdita	Lasionycta subdita[12 individuals]
827	Noctuidae	Noctuinae	Eriopygini	Lasionycta subfumosa (Gibson, 1920)	Lasionycta subfumosa	Lasionycta subfumosa[2 individuals]
828	Noctuidae	Noctuinae	Eriopygini	Lasionycta subfuscula (Grote, 1874)	Lasionycta subfuscula	Lasionycta subfuscula[18 individuals]
829	Noctuidae	Noctuinae	Eriopygini	Lasionycta taigata Lafontaine, 1988	Lasionycta taigata	Lasionycta taigata[18 individuals]
830	Noctuidae	Noctuinae	Eriopygini	Lasionycta uniformis (Smith, 1893)	Lasionycta uniformis	Lasionycta uniformis[33 individuals]
831	Noctuidae	Noctuinae	Eriopygini	Neleucania praegracilis (Grote, 1877)	Neleucania praegracilis	Neleucania praegracilis[4 individuals]
832	Noctuidae	Noctuinae	Eriopygini	Orthodes cynica Guenée, 1852	Orthodes cynica	Orthodes cynica[140 individuals]
833	Noctuidae	Noctuinae	Eriopygini	“Orthodes” detracta (Walker, 1857)	Orthodes detracta	Orthodes detracta[55 individuals]
834	Noctuidae	Noctuinae	Eriopygini	Orthodes goodelli (Grote, 1875)	Orthodes goodelli	Orthodes goodelli[9 individuals]
835	Noctuidae	Noctuinae	Eriopygini	Orthodes majuscula Herrich-Schäffer, 1868	Orthodes majuscula	Orthodes majuscula[8 individuals]
836	Noctuidae	Noctuinae	Eriopygini	“Orthodes” noverca (Grote, 1878)	Orthodes noverca	Orthodes noverca[27 individuals]
837	Noctuidae	Noctuinae	Eriopygini	Orthodes obscura (Smith, 1888)	Orthodes obscura	Orthodes obscura[9 individuals]
838	Noctuidae	Noctuinae	Eriopygini	Protorthodes curtica (Smith, 1890)	Protorthodes curtica	Protorthodes curtica[76 individuals]
839	Noctuidae	Noctuinae	Eriopygini	Protorthodes eureka (Barnes & Benjamin, 1927)	Protorthodes eureka	Protorthodes eureka[2 individuals]
840	Noctuidae	Noctuinae	Eriopygini	Protorthodes incincta (Morrison, 1874)	Protorthodes incincta	Protorthodes incincta[17 individuals]
841	Noctuidae	Noctuinae	Eriopygini	Protorthodes oviduca (Guenée, 1852)	Protorthodes oviduca	Protorthodes oviduca[38 individuals]
842	Noctuidae	Noctuinae	Eriopygini	Protorthodes rufula (Grote, 1874)	Protorthodes rufula	Protorthodes rufula[59 individuals]
843	Noctuidae	Noctuinae	Eriopygini	Psammopolia arietis (Grote, 1879)	Psammopolia arietis	Psammopolia arietis[1 individuals]
844	Noctuidae	Noctuinae	Eriopygini	Psammopolia wyatti (Barnes & Benjamin, 1926)	Psammopolia wyatti	Psammopolia wyatti[2 individuals]
845	Noctuidae	Noctuinae	Eriopygini	Pseudorthodes irrorata (Smith, 1888)	Pseudorthodes irrorata	Pseudorthodes irrorata[16 individuals]
846	Noctuidae	Noctuinae	Eriopygini	Pseudorthodes vecors (Guenée, 1852)	Pseudorthodes vecors	Pseudorthodes vecors[23 individuals]
847	Noctuidae	Noctuinae	Eriopygini	Trichocerapoda oblita (Grote, 1877)	Trichocerapoda oblita	Trichocerapoda oblita[3 individuals]
848	Noctuidae	Noctuinae	Eriopygini	Tricholita notata Strecker, 1898	Tricholita notata	Tricholita notata[1 individuals]
849	Noctuidae	Noctuinae	Eriopygini	Tricholita signata (Walker, 1860)	Tricholita signata	Tricholita signata[55 individuals]
850	Noctuidae	Noctuinae	Eriopygini	Ulolonche culea (Guenée, 1852)	Ulolonche culea	Ulolonche culea[13 individuals]
851	Noctuidae	Noctuinae	Eriopygini	Ulolonche disticha (Morrison, 1875)	Ulolonche disticha	Ulolonche disticha[1 individuals]
852	Noctuidae	Noctuinae	Eriopygini	Ulolonche modesta (Morrison, 1874)	Ulolonche modesta	Ulolonche modesta[2 individuals]
853	Noctuidae	Noctuinae	Eriopygini	Ulolonche orbiculata (Smith, 1891)	Ulolonche orbiculata	Ulolonche orbiculata[5 individuals]
854	Noctuidae	Noctuinae	Eriopygini	Zosteropoda hirtipes Grote, 1874	Zosteropoda hirtipes	Zosteropoda hirtipes[6 individuals]
855	Noctuidae	Noctuinae	Hadenini	Afotella cylindrica (Grote, 1880)	Afotella cylindrica	Afotella cylindrica[3 individuals]
856	Noctuidae	Noctuinae	Hadenini	Anarta alta (Barnes & Benjamin, 1924)	Anarta alta	Anarta alta[7 individuals]
857	Noctuidae	Noctuinae	Hadenini	Anarta antica (Smith, 1891)	Anarta antica	Anarta antica[1 individuals]
858	Noctuidae	Noctuinae	Hadenini	Anarta columbica (McDunnough, 1930)	Anarta columbica	Anarta columbica[64 individuals]
859	Noctuidae	Noctuinae	Hadenini	Anarta crotchii (Grote, 1880)	Anarta crotchii	Anarta crotchii[5 individuals]
860	Noctuidae	Noctuinae	Hadenini	Anarta decepta (Grote, 1883)	Anarta decepta	Anarta decepta[6 individuals]
861	Noctuidae	Noctuinae	Hadenini	Anarta edwardsii (Smith, [1888])	Anarta edwardsii	Anarta edwardsii[2 individuals]
862	Noctuidae	Noctuinae	Hadenini	Anarta farnhami (Grote, 1873)	Anarta farnhami	Anarta farnhami[40 individuals]
863	Noctuidae	Noctuinae	Hadenini	Anarta hamata (McDunnough, 1930)	Anarta hamata	Anarta hamata[5 individuals]
864	Noctuidae	Noctuinae	Hadenini	Anarta inconcinna Smith, [1888]	Anarta inconcinna	Anarta inconcinna[15 individuals]
865	Noctuidae	Noctuinae	Hadenini	Anarta mutata (Dod, 1913)	Anarta mutata	Anarta mutata[4 individuals]
866	Noctuidae	Noctuinae	Hadenini	Anarta nigrolunata Packard, 1867	Anarta nigrolunata	Anarta nigrolunata[8 individuals]
867	Noctuidae	Noctuinae	Hadenini	Anarta obesula (Smith, 1904)	Anarta obesula	Anarta obesula[4 individuals]
868	Noctuidae	Noctuinae	Hadenini	Anarta oregonica (Grote, 1881)	Anarta oregonica	Anarta oregonica[8 individuals]
869	Noctuidae	Noctuinae	Hadenini	Anarta trifolii (Hufnagel, 1766)	Anarta trifolii	Anarta trifolii[13 individuals]
870	Noctuidae	Noctuinae	Hadenini	Coranarta luteola (Grote & Robinson, 1865)	Coranarta luteola	Coranarta luteola[7 individuals]
871	Noctuidae	Noctuinae	Hadenini	Coranarta macrostigma (Lafontaine & Mikkola, 1987)	Coranarta macrostigma	Coranarta macrostigma[6 individuals]
872	Noctuidae	Noctuinae	Hadenini	Dargida diffusa (Walker, 1856)	Dargida diffusa	Dargida diffusa[24 individuals]
873	Noctuidae	Noctuinae	Hadenini	Dargida procinctus (Grote, 1873)	Dargida procinctus	Dargida procinctus[15 individuals]
874	Noctuidae	Noctuinae	Hadenini	Dargida rubripennis (Grote & Robinson, 1870)	Dargida rubripennis	Dargida rubripennis[1 individuals]
875	Noctuidae	Noctuinae	Hadenini	Dargida terrapictalis (Buckett, 1969)	Dargida terrapictalis	Dargida terrapictalis[1 individuals]
876	Noctuidae	Noctuinae	Hadenini	Escaria homogena McDunnough, 1922	Escaria homogena	Escaria homogena[5 individuals]
877	Noctuidae	Noctuinae	Hadenini	Hada sutrina (Grote, 1881)	Hada sutrina	Hada sutrina[20 individuals]
878	Noctuidae	Noctuinae	Hadenini	Hadena caelestis Troubridge & Crabo, 2002	Hadena caelestis	Hadena caelestis[5 individuals]
879	Noctuidae	Noctuinae	Hadenini	Hadena capsularis (Guenée, 1852)	Hadena capsularis	Hadena capsularis[3 individuals]
880	Noctuidae	Noctuinae	Hadenini	Hadena circumvadis (Smith, 1902)	Hadena circumvadis	Hadena circumvadis[4 individuals]
881	Noctuidae	Noctuinae	Hadenini	Hadena ectrapela (Smith, 1898)	Hadena ectrapela	Hadena ectrapela[2 individuals]
882	Noctuidae	Noctuinae	Hadenini	Hadena variolata (Smith, 1888)	Hadena variolata	Hadena variolata[3 individuals]
883	Noctuidae	Noctuinae	Hadenini	Hadenella pergentilis Grote, 1883	Hadenella pergentilis	Hadenella pergentilis[6 individuals]
884	Noctuidae	Noctuinae	Hadenini	Lacanobia atlantica (Grote, 1874)	Lacanobia atlantica	Lacanobia atlantica[22 individuals]
885	Noctuidae	Noctuinae	Hadenini	Lacanobia grandis (Guenée, 1852)	Lacanobia grandis	Lacanobia grandis[20 individuals]
886	Noctuidae	Noctuinae	Hadenini	Lacanobia nevadae (Grote, 1876)	Lacanobia nevadae	Lacanobia nevadae[12 individuals]
887	Noctuidae	Noctuinae	Hadenini	Lacanobia radix (Walker, [1857])	Lacanobia radix	Lacanobia radix[22 individuals]
888	Noctuidae	Noctuinae	Hadenini	Lacanobia subjuncta (Grote & Robinson, 1868)	Lacanobia subjuncta	Lacanobia subjuncta[35 individuals]
889	Noctuidae	Noctuinae	Hadenini	Mamestra configurata Walker, 1856	Mamestra configurata	Mamestra configurata[6 individuals]
890	Noctuidae	Noctuinae	Hadenini	Mamestra curialis (Smith, 1888)	Mamestra curialis	Mamestra curialis[5 individuals]
891	Noctuidae	Noctuinae	Hadenini	Melanchra adjuncta (Guenée, 1852)	Melanchra adjuncta	Melanchra adjuncta[82 individuals]
892	Noctuidae	Noctuinae	Hadenini	Melanchra assimilis (Morrison, 1874)	Melanchra assimilis	Melanchra assimilis[7 individuals]
893	Noctuidae	Noctuinae	Hadenini	Melanchra picta (Harris, 1841)	Melanchra picta	Melanchra picta[5 individuals]
894	Noctuidae	Noctuinae	Hadenini	Melanchra pulverulenta (Smith, 1888)	Melanchra pulverulenta	Melanchra pulverulenta[38 individuals]
895	Noctuidae	Noctuinae	Hadenini	Papestra biren (Goeze, 1781)	Papestra biren	Papestra biren[9 individuals]
896	Noctuidae	Noctuinae	Hadenini	Papestra brenda (Barnes & McDunnough, 1916)	Papestra brenda	Papestra brenda[4 individuals]
897	Noctuidae	Noctuinae	Hadenini	Papestra cristifera (Walker, 1858)	Papestra cristifera	Papestra cristifera[11 individuals]
898	Noctuidae	Noctuinae	Hadenini	Papestra invalida (Smith, 1891)	Papestra invalida	Papestra invalida[2 individuals]
899	Noctuidae	Noctuinae	Hadenini	Papestra quadrata (Smith, 1891)	Papestra quadrata	Papestra quadrata[39 individuals]
900	Noctuidae	Noctuinae	Hadenini	Polia discalis (Grote, 1877)	Polia discalis	Polia discalis[3 individuals]
901	Noctuidae	Noctuinae	Hadenini	Polia imbrifera (Guenée, 1852)	Polia imbrifera	Polia imbrifera[22 individuals]
902	Noctuidae	Noctuinae	Hadenini	Polia nimbosa (Guenée, 1852)	Polia nimbosa	Polia nimbosa[84 individuals]
903	Noctuidae	Noctuinae	Hadenini	Polia nugatis (Smith, 1898)	Polia nugatis	Polia nugatis[39 individuals]
904	Noctuidae	Noctuinae	Hadenini	Polia piniae Buckett & Bauer, 1967	Polia piniae	Polia piniae[70 individuals]
905	Noctuidae	Noctuinae	Hadenini	Polia propodea McCabe, 1980	Polia propodea	Polia propodea[38 individuals]
906	Noctuidae	Noctuinae	Hadenini	Polia purpurissata (Grote, 1864)	Polia purpurissata	Polia purpurissata[65 individuals]
907	Noctuidae	Noctuinae	Hadenini	Polia richardsoni (Curtis, 1834)	Polia richardsoni	Polia richardsoni[3 individuals]
908	Noctuidae	Noctuinae	Hadenini	Polia rogenhoferi (Möschler, 1870)	Polia rogenhoferi	Polia rogenhoferi[40 individuals]
909	Noctuidae	Noctuinae	Hadenini	Scotogramma fervida Barnes & McDunnough, 1912	Scotogramma fervida	Scotogramma fervida[4 individuals]
910	Noctuidae	Noctuinae	Hadenini	Scotogramma submarina (Grote, 1883)	Scotogramma submarina	Scotogramma submarina[2 individuals]
911	Noctuidae	Noctuinae	Hadenini	Sideridis artesta (Smith, 1903)	Sideridis artesta	Sideridis artesta[3 individuals]
912	Noctuidae	Noctuinae	Hadenini	Sideridis congermana (Morrison, 1874)	Sideridis congermana	Sideridis congermana[3 individuals]
913	Noctuidae	Noctuinae	Hadenini	Sideridis fuscolutea (Smith, 1892)	Sideridis fuscolutea	Sideridis fuscolutea[3 individuals]
914	Noctuidae	Noctuinae	Hadenini	Sideridis maryx (Guenée, 1852)	Sideridis maryx	Sideridis maryx[33 individuals]
915	Noctuidae	Noctuinae	Hadenini	Sideridis rosea (Harvey, 1874)	Sideridis rosea	Sideridis rosea[13 individuals]
916	Noctuidae	Noctuinae	Hadenini	Sideridis uscripta (Smith, 1891)	Sideridis uscripta	Sideridis uscripta[6 individuals]
917	Noctuidae	Noctuinae	Hadenini	Spiramater lutra (Guenée, 1852)	Spiramater lutra	Spiramater lutra[54 individuals]
918	Noctuidae	Noctuinae	Hadenini	Trichordestra dodii (Smith, 1904)	Trichordestra dodii	Trichordestra dodii[3 individuals]
919	Noctuidae	Noctuinae	Hadenini	Trichordestra legitima (Grote, 1864)	Trichordestra legitima	Trichordestra legitima[19 individuals]
920	Noctuidae	Noctuinae	Hadenini	Trichordestra lilacina (Harvey, 1874)	Trichordestra lilacina	Trichordestra lilacina[28 individuals]
921	Noctuidae	Noctuinae	Hadenini	Trichordestra liquida (Grote, 1881)	Trichordestra liquida	Trichordestra liquida[42 individuals]
922	Noctuidae	Noctuinae	Hadenini	Trichordestra rugosa (Morrison, 1875)	Trichordestra rugosa	Trichordestra rugosa[4 individuals]
923	Noctuidae	Noctuinae	Hadenini	Trichordestra tacoma (Strecker, 1900)	Trichordestra tacoma	Trichordestra tacoma[6 individuals]
924	Noctuidae	Noctuinae	Leucaniini	Leucania adjuta (Grote, 1874)	Leucania adjuta	Leucania adjuta[24 individuals]
925	Noctuidae	Noctuinae	Leucaniini	Leucania anteroclara Smith, 1902	Leucania anteroclara	Leucania anteroclara[64 individuals]
926	Noctuidae	Noctuinae	Leucaniini	Leucania commoides Guenée, 1852	Leucania commoides	Leucania commoides[41 individuals]
927	Noctuidae	Noctuinae	Leucaniini	Leucania dia (Grote, 1879)	Leucania dia	Leucania dia[130 individuals]
928	Noctuidae	Noctuinae	Leucaniini	Leucania farcta (Grote, 1881)	Leucania farcta	Leucania farcta[57 individuals]
929	Noctuidae	Noctuinae	Leucaniini	Leucania inermis (Forbes, 1936)	Leucania inermis	Leucania inermis[5 individuals]
930	Noctuidae	Noctuinae	Leucaniini	Leucania insueta Guenée, 1852	Leucania insueta	Leucania insueta[41 individuals]
931	Noctuidae	Noctuinae	Leucaniini	Leucania lapidaria (Grote, 1876)	Leucania lapidaria	Leucania lapidaria[12 individuals]
932	Noctuidae	Noctuinae	Leucaniini	Leucania linda Franclemont, 1952	Leucania linda	Leucania linda[4 individuals]
933	Noctuidae	Noctuinae	Leucaniini	Leucania linita Guenée, 1852	Leucania linita	Leucania linita[8 individuals]
934	Noctuidae	Noctuinae	Leucaniini	Leucania multilinea Walker, 1856	Leucania multilinea	Leucania multilinea[83 individuals]
935	Noctuidae	Noctuinae	Leucaniini	Leucania oregona Smith, 1902	Leucania oregona	Leucania oregona[2 individuals]
936	Noctuidae	Noctuinae	Leucaniini	Leucania phragmitidicola Guenée, 1852	Leucania phragmitidicola	Leucania phragmitidicola[9 individuals]
937	Noctuidae	Noctuinae	Leucaniini	Leucania pseudargyria Guenée, 1852	Leucania pseudargyria	Leucania pseudargyria[20 individuals]
938	Noctuidae	Noctuinae	Leucaniini	Leucania ursula (Forbes, 1936)	Leucania ursula	Leucania ursula[9 individuals]
939	Noctuidae	Noctuinae	Leucaniini	Mythimna oxygala (Grote, 1881)	Mythimna oxygala	Mythimna oxygala[138 individuals]
940	Noctuidae	Noctuinae	Leucaniini	Mythimna unipuncta (Haworth, 1809)	Mythimna unipuncta	Mythimna unipuncta[114 individuals]
941	Noctuidae	Noctuinae	Leucaniini	Mythimna yukonensis (Hampson, 1911)	Mythimna yukonensis	Mythimna yukonensis[4 individuals]
942	Noctuidae	Noctuinae	Noctuini	Abagrotis alternata (Grote, 1864)	Abagrotis alternata	Abagrotis alternata[9 individuals]
943	Noctuidae	Noctuinae	Noctuini	Abagrotis anchocelioides (Guenée, 1852)	Abagrotis anchocelioides	Abagrotis anchocelioides[4 individuals]
944	Noctuidae	Noctuinae	Noctuini	Abagrotis apposita (Grote, 1878)	Abagrotis apposita	Abagrotis apposita[10 individuals]
945	Noctuidae	Noctuinae	Noctuini	Abagrotis baueri McDunnough, 1949	Abagrotis baueri	Abagrotis baueri[6 individuals]
946	Noctuidae	Noctuinae	Noctuini	Abagrotis brunneipennis (Grote, 1875)	Abagrotis brunneipennis	Abagrotis brunneipennis[15 individuals]
947	Noctuidae	Noctuinae	Noctuini	Abagrotis cupida (Grote, 1865)	Abagrotis cupida	Abagrotis cupida[38 individuals]
948	Noctuidae	Noctuinae	Noctuini	Abagrotis dickeli Lafontaine, 1998	Abagrotis dickeli	Abagrotis dickeli[8 individuals]
949	Noctuidae	Noctuinae	Noctuini	Abagrotis discoidalis (Grote, 1876)	Abagrotis discoidalis	Abagrotis discoidalis[1 individuals]
950	Noctuidae	Noctuinae	Noctuini	Abagrotis dodi McDunnough, 1927	Abagrotis dodi	Abagrotis dodi[5 individuals]
951	Noctuidae	Noctuinae	Noctuini	Abagrotis duanca (Smith, 1908)	Abagrotis duanca	Abagrotis duanca[8 individuals]
952	Noctuidae	Noctuinae	Noctuini	Abagrotis erratica (Smith, 1890)	Abagrotis erratica	Abagrotis erratica[2 individuals]
953	Noctuidae	Noctuinae	Noctuini	Abagrotis forbesi (Benjamin, 1921)	Abagrotis forbesi	Abagrotis forbesi[2 individuals]
954	Noctuidae	Noctuinae	Noctuini	Abagrotis glenni Buckett, 1968	Abagrotis glenni	Abagrotis glenni[5 individuals]
955	Noctuidae	Noctuinae	Noctuini	Abagrotis hermina Lafontaine, 1998	Abagrotis hermina	Abagrotis hermina[13 individuals]
956	Noctuidae	Noctuinae	Noctuini	Abagrotis mirabilis (Grote, 1879)	Abagrotis mirabilis	Abagrotis mirabilis[16 individuals]
957	Noctuidae	Noctuinae	Noctuini	Abagrotis nanalis (Grote, 1881)	Abagrotis nanalis	Abagrotis nanalis[16 individuals]
958	Noctuidae	Noctuinae	Noctuini	Abagrotis nefascia (Smith, 1908)	Abagrotis nefascia	Abagrotis nefascia[6 individuals]
959	Noctuidae	Noctuinae	Noctuini	Abagrotis orbis (Grote, 1876)	Abagrotis orbis	Abagrotis orbis[3 individuals]
960	Noctuidae	Noctuinae	Noctuini	Abagrotis placida (Grote, 1876)	Abagrotis placida	Abagrotis placida[54 individuals]
961	Noctuidae	Noctuinae	Noctuini	Abagrotis pulchrata (Blackmore, 1925)	Abagrotis pulchrata	Abagrotis pulchrata[1 individuals]
962	Noctuidae	Noctuinae	Noctuini	Abagrotis reedi Buckett, 1969	Abagrotis reedi	Abagrotis reedi[13 individuals]
963	Noctuidae	Noctuinae	Noctuini	Abagrotis scopeops (Dyar, 1904)	Abagrotis scopeops	Abagrotis scopeops[10 individuals]
964	Noctuidae	Noctuinae	Noctuini	Abagrotis trigona (Smith, 1893)	Abagrotis trigona	Abagrotis trigona[22 individuals]
965	Noctuidae	Noctuinae	Noctuini	Abagrotis turbulenta McDunnough, 1927	Abagrotis turbulenta	Abagrotis turbulenta[3 individuals]
966	Noctuidae	Noctuinae	Noctuini	Abagrotis variata (Grote, 1876)	Abagrotis variata	Abagrotis variata[6 individuals]
967	Noctuidae	Noctuinae	Noctuini	Abagrotis vittifrons (Grote, 1864)	Abagrotis vittifrons	Abagrotis vittifrons[16 individuals]
968	Noctuidae	Noctuinae	Noctuini	Actebia balanitis (Grote, 1873)	Actebia balanitis	Actebia balanitis[28 individuals]
969	Noctuidae	Noctuinae	Noctuini	Actebia fennica (Tauscher, 1806)	Actebia fennica	Actebia fennica[8 individuals]
970	Noctuidae	Noctuinae	Noctuini	Adelphagrotis indeterminata (Walker, 1865)	Adelphagrotis indeterminata	Adelphagrotis indeterminata[6 individuals]
971	Noctuidae	Noctuinae	Noctuini	Adelphagrotis stellaris (Grote, 1880)	Adelphagrotis stellaris	Adelphagrotis stellaris[19 individuals]
972	Noctuidae	Noctuinae	Noctuini	Agnorisma badinodis (Grote, 1874)	Agnorisma badinodis	Agnorisma badinodis[13 individuals]
973	Noctuidae	Noctuinae	Noctuini	Agnorisma bugrai (Kocak, 1983)	Agnorisma bugrai	Agnorisma bugrai[34 individuals]
974	Noctuidae	Noctuinae	Noctuini	Agrotis antica Crabo & Lafontaine, 2004	Agrotis antica	Agrotis antica[1 individuals]
975	Noctuidae	Noctuinae	Noctuini	Agrotis arenarius Neil, 1983	Agrotis arenarius	Agrotis arenarius[3 individuals]
976	Noctuidae	Noctuinae	Noctuini	Agrotis daedalus (Smith, 1890)	Agrotis daedalus	Agrotis daedalus[1 individuals]
977	Noctuidae	Noctuinae	Noctuini	Agrotis gladiaria Morrison, 1874	Agrotis gladiaria	Agrotis gladiaria[16 individuals]
978	Noctuidae	Noctuinae	Noctuini	Agrotis gravis Grote, 1874	Agrotis gravis	Agrotis gravis[1 individuals]
979	Noctuidae	Noctuinae	Noctuini	Agrotis ipsilon (Hufnagel, 1766)	Agrotis ipsilon	Agrotis ipsilon[58 individuals]
980	Noctuidae	Noctuinae	Noctuini	Agrotis kingi McDunnough, 1932	Agrotis kingi	Agrotis kingi
981	Noctuidae	Noctuinae	Noctuini	Agrotis obliqua (Smith, 1903)	Agrotis obliqua	Agrotis obliqua[20 individuals]
982	Noctuidae	Noctuinae	Noctuini	Agrotis orthogonia Morrison, 1876	Agrotis orthogonia	Agrotis orthogonia[2 individuals]
983	Noctuidae	Noctuinae	Noctuini	Agrotis rileyana Morrison, 1874	Agrotis rileyana	Agrotis rileyana[4 individuals]
984	Noctuidae	Noctuinae	Noctuini	Agrotis robustior (Smith, 1899)	Agrotis robustior	Agrotis robustior[4 individuals]
985	Noctuidae	Noctuinae	Noctuini	Agrotis ruta (Eversmann, 1851)	Agrotis ruta	Agrotis ruta[241 individuals]
986	Noctuidae	Noctuinae	Noctuini	Agrotis stigmosa Morrison, 1874	Agrotis stigmosa	Agrotis stigmosa[1 individuals]
987	Noctuidae	Noctuinae	Noctuini	Agrotis vancouverensis Grote, 1873	Agrotis vancouverensis	Agrotis vancouverensis[57 individuals]
988	Noctuidae	Noctuinae	Noctuini	Agrotis venerabilis Walker, [1857]	Agrotis venerabilis	Agrotis venerabilis[115 individuals]
989	Noctuidae	Noctuinae	Noctuini	Agrotis vetusta (Walker, 1856)	Agrotis vetusta	Agrotis vetusta[8 individuals]
990	Noctuidae	Noctuinae	Noctuini	Agrotis volubilis Harvey, 1874	Agrotis volubilis	Agrotis volubilis[22 individuals]
991	Noctuidae	Noctuinae	Noctuini	Anaplectoides prasina ([Denis & Schiffermüller], [1775])	Anaplectoides prasina	Anaplectoides prasina[143 individuals]
992	Noctuidae	Noctuinae	Noctuini	Anaplectoides pressus (Grote, 1874)	Anaplectoides pressus	Anaplectoides pressus[106 individuals]
993	Noctuidae	Noctuinae	Noctuini	Anicla exuberans (Smith, 1898)	Anicla exuberans	Anicla exuberans[17 individuals]
994	Noctuidae	Noctuinae	Noctuini	Anicla forbesi (Franclemont, 1952)	Anicla forbesi	Anicla forbesi[5 individuals]
995	Noctuidae	Noctuinae	Noctuini	Anicla illapsa (Walker, 1857)	Anicla illapsa	Anicla illapsa[7 individuals]
996	Noctuidae	Noctuinae	Noctuini	Anicla infecta (Ochsenheimer, 1816)	Anicla infecta	Anicla infecta[22 individuals]
997	Noctuidae	Noctuinae	Noctuini	Anicla tenuescens (Smith, 1890)	Anicla tenuescens	Anicla tenuescens[4 individuals]
998	Noctuidae	Noctuinae	Noctuini	Anicla tepperi (Smith, 1888)	Anicla tepperi	Anicla tepperi[7 individuals]
999	Noctuidae	Noctuinae	Noctuini	Aplectoides condita (Guenée, 1852)	Aplectoides condita	Aplectoides condita[61 individuals]
1000	Noctuidae	Noctuinae	Noctuini	Cerastis enigmatica Lafontaine & Crabo, 1997	Cerastis enigmatica	Cerastis enigmatica[9 individuals]
1001	Noctuidae	Noctuinae	Noctuini	Cerastis fishii (Grote, 1878)	Cerastis fishii	Cerastis fishii[2 individuals]
1002	Noctuidae	Noctuinae	Noctuini	Cerastis salicarum (Walker, 1857)	Cerastis salicarum	Cerastis salicarum[12 individuals]
1003	Noctuidae	Noctuinae	Noctuini	Cerastis tenebrifera (Walker, 1865)	Cerastis tenebrifera	Cerastis tenebrifera[6 individuals]
1004	Noctuidae	Noctuinae	Noctuini	Chersotis juncta (Grote, 1878)	Chersotis juncta	Chersotis juncta[31 individuals]
1005	Noctuidae	Noctuinae	Noctuini	Choephora fungorum Grote & Robinson, 1868	Choephora fungorum	Choephora fungorum[11 individuals]
1006	Noctuidae	Noctuinae	Noctuini	Coenophila opacifrons (Grote, 1878)	Coenophila opacifrons	Coenophila opacifrons[9 individuals]
1007	Noctuidae	Noctuinae	Noctuini	Copablepharon absidum (Harvey, 1875)	Copablepharon absidum	Copablepharon absidum[3 individuals]
1008	Noctuidae	Noctuinae	Noctuini	Copablepharon fuscum Troubridge & Crabo, 1996	Copablepharon fuscum	Copablepharon fuscum[3 individuals]
1009	Noctuidae	Noctuinae	Noctuini	Copablepharon grandis (Strecker, 1878)	Copablepharon grandis	Copablepharon grandis[5 individuals]
1010	Noctuidae	Noctuinae	Noctuini	Copablepharon longipenne Grote, 1882	Copablepharon longipenne	Copablepharon longipenne[3 individuals]
1011	Noctuidae	Noctuinae	Noctuini	Copablepharon viridisparsa Dod, 1916	Copablepharon viridisparsa	Copablepharon viridisparsa[4 individuals]
1012	Noctuidae	Noctuinae	Noctuini	Cryptocala acadiensis (Bethune, 1870)	Cryptocala acadiensis	Cryptocala acadiensis[109 individuals]
1013	Noctuidae	Noctuinae	Noctuini	Diarsia calgary (Smith, 1898)	Diarsia calgary	Diarsia calgary[14 individuals]
1014	Noctuidae	Noctuinae	Noctuini	Diarsia dislocata (Smith, 1904)	Diarsia dislocata	Diarsia dislocata[508 individuals]
1015	Noctuidae	Noctuinae	Noctuini	Diarsia esurialis (Grote, 1881)	Diarsia esurialis	Diarsia esurialis[164 individuals]
1016	Noctuidae	Noctuinae	Noctuini	Diarsia jucunda (Walker, [1857])	Diarsia jucunda	Diarsia jucunda[29 individuals]
1017	Noctuidae	Noctuinae	Noctuini	Diarsia rosaria (Grote, 1878)	Diarsia rosaria	Diarsia rosaria [106 individuals]
1018	Noctuidae	Noctuinae	Noctuini	Diarsia rubifera (Grote, 1875)	Diarsia rubifera	Diarsia rubifera[87 individuals]
1019	Noctuidae	Noctuinae	Noctuini	Dichagyris acclivis (Morrison, 1875)	Dichagyris acclivis	Dichagyris acclivis[8 individuals]
1020	Noctuidae	Noctuinae	Noctuini	Dichagyris grotei (Franclemont & Todd, 1983)	Dichagyris grotei	Dichagyris grotei[3 individuals]
1021	Noctuidae	Noctuinae	Noctuini	Dichagyris reliqua Lafontaine & Schweitzer, 2004	Dichagyris reliqua	Dichagyris reliqua[2 individuals]
1022	Noctuidae	Noctuinae	Noctuini	Dichagyris variabilis (Grote, 1874)	Dichagyris variabilis	Dichagyris variabilis[29 individuals]
1023	Noctuidae	Noctuinae	Noctuini	Eucoptocnemis fimbriaris (Guenée, 1852)	Eucoptocnemis fimbriaris	Eucoptocnemis fimbriaris[5 individuals]
1024	Noctuidae	Noctuinae	Noctuini	Eueretagrotis attentus (Grote, 1874)	Eueretagrotis attentus	Eueretagrotis attentus[22 individuals]
1025	Noctuidae	Noctuinae	Noctuini	Eueretagrotis perattentus (Grote, 1876)	Eueretagrotis perattentus	Eueretagrotis perattentus[41 individuals]
1026	Noctuidae	Noctuinae	Noctuini	Eueretagrotis sigmoides (Guenée, 1852)	Eueretagrotis sigmoides	Eueretagrotis sigmoides[4 individuals]
1027	Noctuidae	Noctuinae	Noctuini	Eurois astricta Morrison, 1874	Eurois astricta	Eurois astricta[237 individuals]
1028	Noctuidae	Noctuinae	Noctuini	Eurois nigra (Smith, 1892)	Eurois nigra	Eurois nigra[33 individuals]
1029	Noctuidae	Noctuinae	Noctuini	Eurois occulta (Linnaeus, 1758)	Eurois occulta	Eurois occulta[164 individuals]
1030	Noctuidae	Noctuinae	Noctuini	Euxoa aberrans McDunnough, 1932	Euxoa aberrans	Euxoa aberrans[5 individuals]
1031	Noctuidae	Noctuinae	Noctuini	Euxoa adumbrata (Eversmann, 1842)	Euxoa adumbrata	Euxoa adumbrata[12 individuals]
1032	Noctuidae	Noctuinae	Noctuini	Euxoa aequalis (Harvey, 1876)	Euxoa aequalis	Euxoa aequalis[4 individuals]
1033	Noctuidae	Noctuinae	Noctuini	Euxoa agema (Strecker, 1899)	Euxoa agema	Euxoa agema[7 individuals]
1034	Noctuidae	Noctuinae	Noctuini	Euxoa albipennis (Grote, 1876)	Euxoa albipennis	Euxoa albipennis[12 individuals]
1035	Noctuidae	Noctuinae	Noctuini	Euxoa altens McDunnough, 1946	Euxoa altens	Euxoa altens[1 individuals]
1036	Noctuidae	Noctuinae	Noctuini	Euxoa apopsis Troubridge & Lafontaine, 2010	Euxoa apopsis	Euxoa apopsis[1 individuals]
1037	Noctuidae	Noctuinae	Noctuini	Euxoa atomaris (Smith, 1890)	Euxoa atomaris	Euxoa atomaris[5 individuals]
1038	Noctuidae	Noctuinae	Noctuini	Euxoa atristrigata (Smith, 1890)	Euxoa atristrigata	Euxoa atristrigata[3 individuals]
1039	Noctuidae	Noctuinae	Noctuini	Euxoa auripennis Lafontaine, 1974	Euxoa auripennis	Euxoa auripennis[37 individuals]
1040	Noctuidae	Noctuinae	Noctuini	Euxoa aurulenta (Smith, 1888)	Euxoa aurulenta	Euxoa aurulenta[3 individuals]
1041	Noctuidae	Noctuinae	Noctuini	Euxoa auxiliaris (Grote, 1873)	Euxoa auxiliaris	Euxoa auxiliaris[7 individuals]
1042	Noctuidae	Noctuinae	Noctuini	Euxoa basalis (Grote, 1879)	Euxoa basalis	Euxoa basalis[4 individuals]
1043	Noctuidae	Noctuinae	Noctuini	Euxoa bicollaris (Grote, 1878)	Euxoa bicollaris	Euxoa bicollaris[2 individuals]
1044	Noctuidae	Noctuinae	Noctuini	Euxoa biformata Smith, 1910	Euxoa biformata	Euxoa biformata[8 individuals]
1045	Noctuidae	Noctuinae	Noctuini	Euxoa bochus (Morrison, 1874)	Euxoa bochus	Euxoa bochus[14 individuals]
1046	Noctuidae	Noctuinae	Noctuini	Euxoa bostoniensis (Grote, 1874)	Euxoa bostoniensis	Euxoa bostoniensis[4 individuals]
1047	Noctuidae	Noctuinae	Noctuini	Euxoa brevipennis (Smith, 1888)	Euxoa brevipennis	Euxoa brevipennis[2 individuals]
1048	Noctuidae	Noctuinae	Noctuini	Euxoa brunneigera (Grote, 1876)	Euxoa brunneigera	Euxoa brunneigera[9 individuals]
1049	Noctuidae	Noctuinae	Noctuini	Euxoa campestris (Grote, 1875)	Euxoa campestris	Euxoa campestris[26 individuals]
1050	Noctuidae	Noctuinae	Noctuini	Euxoa castanea Lafontaine, 1981	Euxoa castanea	Euxoa castanea[69 individuals]
1051	Noctuidae	Noctuinae	Noctuini	Euxoa catenula (Grote, 1879)	Euxoa catenula	Euxoa catenula[23 individuals]
1052	Noctuidae	Noctuinae	Noctuini	Euxoa chimoensis Hardwick, 1966	Euxoa chimoensis	Euxoa chimoensis[9 individuals]
1053	Noctuidae	Noctuinae	Noctuini	Euxoa choris (Harvey, 1876)	Euxoa choris	Euxoa choris[22 individuals]
1054	Noctuidae	Noctuinae	Noctuini	Euxoa churchillensis (McDunnough, 1932)	Euxoa churchillensis	Euxoa churchillensis[6 individuals]
1055	Noctuidae	Noctuinae	Noctuini	Euxoa cicatricosa (Grote & Robinson, 1865)	Euxoa cicatricosa	Euxoa cicatricosa[3 individuals]
1056	Noctuidae	Noctuinae	Noctuini	Euxoa cinereopallidus (Smith, 1903)	Euxoa cinereopallidus	Euxoa cinereopallidus[2 individuals]
1057	Noctuidae	Noctuinae	Noctuini	Euxoa citricolor (Grote, 1880)	Euxoa citricolor	Euxoa citricolor[2 individuals]
1058	Noctuidae	Noctuinae	Noctuini	Euxoa clausa McDunnough, 1923	Euxoa clausa	Euxoa clausa[1 individuals]
1059	Noctuidae	Noctuinae	Noctuini	Euxoa comosa (Morrison, 1876)	Euxoa comosa	Euxoa comosa[82 individuals]
1060	Noctuidae	Noctuinae	Noctuini	Euxoa costata (Grote, 1876)	Euxoa costata	Euxoa costata[1 individuals]
1061	Noctuidae	Noctuinae	Noctuini	Euxoa cursoria (Hufnagel, 1766)	Euxoa cursoria	Euxoa cursoria[6 individuals]
1062	Noctuidae	Noctuinae	Noctuini	Euxoa dargo (Strecker, 1898)	Euxoa dargo	Euxoa dargo[1 individuals]
1063	Noctuidae	Noctuinae	Noctuini	Euxoa declarata (Walker, 1865)	Euxoa declarata	Euxoa declarata[11 individuals]
1064	Noctuidae	Noctuinae	Noctuini	Euxoa detersa (Walker, 1856)	Euxoa detersa	Euxoa detersa[9 individuals]
1065	Noctuidae	Noctuinae	Noctuini	Euxoa difformis (Smith, 1900)	Euxoa difformis	Euxoa difformis[32 individuals]
1066	Noctuidae	Noctuinae	Noctuini	Euxoa dissona (Möschler, 1860)	Euxoa dissona	Euxoa dissona[6 individuals]
1067	Noctuidae	Noctuinae	Noctuini	Euxoa divergens (Walker, [1857])	Euxoa divergens	Euxoa divergens[106 individuals]
1068	Noctuidae	Noctuinae	Noctuini	Euxoa dodi McDunnough, 1923	Euxoa dodi	Euxoa dodi[3 individuals]
1069	Noctuidae	Noctuinae	Noctuini	Euxoa edictalis (Smith, 1893)	Euxoa edictalis	Euxoa edictalis[2 individuals]
1070	Noctuidae	Noctuinae	Noctuini	Euxoa excogita (Smith, 1900)	Euxoa excogita	Euxoa excogita[8 individuals]
1071	Noctuidae	Noctuinae	Noctuini	Euxoa extranea (Smith, 1888)	Euxoa extranea	Euxoa extranea[8 individuals]
1072	Noctuidae	Noctuinae	Noctuini	Euxoa flavicollis (Smith, 1888)	Euxoa flavicollis	Euxoa flavicollis[10 individuals]
1073	Noctuidae	Noctuinae	Noctuini	Euxoa fumalis (Grote, 1873)	Euxoa fumalis	Euxoa fumalis[6 individuals]
1074	Noctuidae	Noctuinae	Noctuini	Euxoa furtivus (Smith, 1890)	Euxoa furtivus	Euxoa furtivus[2 individuals]
1075	Noctuidae	Noctuinae	Noctuini	Euxoa hollemani (Grote, 1874)	Euxoa hollemani	Euxoa hollemani[2 individuals]
1076	Noctuidae	Noctuinae	Noctuini	Euxoa hyperborea Lafontaine, 1987	Euxoa hyperborea	Euxoa hyperborea[2 individuals]
1077	Noctuidae	Noctuinae	Noctuini	Euxoa idahoensis (Grote, 1878)	Euxoa idahoensis	Euxoa idahoensis[36 individuals]
1078	Noctuidae	Noctuinae	Noctuini	Euxoa infausta (Walker, 1865)	Euxoa infausta	Euxoa infausta[5 individuals]
1079	Noctuidae	Noctuinae	Noctuini	Euxoa infracta (Morrison, 1875)	Euxoa infracta	Euxoa infracta[14 individuals]
1080	Noctuidae	Noctuinae	Noctuini	Euxoa intermontana Lafontaine, 1975	Euxoa intermontana	Euxoa intermontana[3 individuals]
1081	Noctuidae	Noctuinae	Noctuini	Euxoa intrita (Morrison, 1874)	Euxoa intrita	Euxoa intrita[15 individuals]
1082	Noctuidae	Noctuinae	Noctuini	Euxoa laetificans (Smith, 1894)	Euxoa laetificans	Euxoa laetificans[3 individuals]
1083	Noctuidae	Noctuinae	Noctuini	Euxoa lewisi (Grote, 1873)	Euxoa lewisi	Euxoa lewisi[4 individuals]
1084	Noctuidae	Noctuinae	Noctuini	Euxoa lillooet McDunnough, 1927	Euxoa lillooet	Euxoa lillooet[4 individuals]
1085	Noctuidae	Noctuinae	Noctuini	Euxoa macleani McDunnough, 1927	Euxoa macleani	Euxoa macleani[7 individuals]
1086	Noctuidae	Noctuinae	Noctuini	Euxoa macrodentata Hardwick, 1965	Euxoa macrodentata	Euxoa macrodentata[1 individuals]
1087	Noctuidae	Noctuinae	Noctuini	Euxoa maimes (Smith, 1903)	Euxoa maimes	Euxoa maimes[6 individuals]
1088	Noctuidae	Noctuinae	Noctuini	Euxoa manitobana McDunnough, 1925	Euxoa manitobana	Euxoa manitobana[1 individuals]
1089	Noctuidae	Noctuinae	Noctuini	Euxoa medialis (Smith, 1888)	Euxoa medialis	Euxoa medialis[2 individuals]
1090	Noctuidae	Noctuinae	Noctuini	Euxoa messoria (Harris, 1841)	Euxoa messoria	Euxoa messoria[23 individuals]
1091	Noctuidae	Noctuinae	Noctuini	Euxoa mimallonis (Grote, 1873)	Euxoa mimallonis	Euxoa mimallonis[12 individuals]
1092	Noctuidae	Noctuinae	Noctuini	Euxoa misturata (Smith, 1890)	Euxoa misturata	Euxoa misturata[1 individuals]
1093	Noctuidae	Noctuinae	Noctuini	Euxoa mitis (Smith, 1894)	Euxoa mitis	Euxoa mitis[3 individuals]
1094	Noctuidae	Noctuinae	Noctuini	Euxoa moerens (Grote, 1883)	Euxoa moerens	Euxoa moerens[2 individuals]
1095	Noctuidae	Noctuinae	Noctuini	Euxoa muldersi Lafontaine & Hensel, 2010	Euxoa muldersi	Euxoa muldersi[2 individuals]
1096	Noctuidae	Noctuinae	Noctuini	Euxoa munis (Grote, 1879)	Euxoa munis	Euxoa munis[3 individuals]
1097	Noctuidae	Noctuinae	Noctuini	Euxoa murdocki (Smith, 1890)	Euxoa murdocki	Euxoa murdocki[1 individuals]
1098	Noctuidae	Noctuinae	Noctuini	Euxoa nevada (Smith, 1900)	Euxoa nevada	Euxoa nevada[2 individuals]
1099	Noctuidae	Noctuinae	Noctuini	Euxoa niveilinea (Grote, 1882)	Euxoa niveilinea	Euxoa niveilinea[5 individuals]
1100	Noctuidae	Noctuinae	Noctuini	Euxoa nomas (Erschov, 1874)	Euxoa nomas	Euxoa nomas[4 individuals]
1101	Noctuidae	Noctuinae	Noctuini	Euxoa nostra (Smith, 1890)	Euxoa nostra	Euxoa nostra[1 individuals]
1102	Noctuidae	Noctuinae	Noctuini	Euxoa obeliscoides (Guenée, 1852)	Euxoa obeliscoides	Euxoa obeliscoides[24 individuals]
1103	Noctuidae	Noctuinae	Noctuini	Euxoa oberfoelli Hardwick, 1973	Euxoa oberfoelli	Euxoa oberfoelli[1 individuals]
1104	Noctuidae	Noctuinae	Noctuini	Euxoa oblongistigma (Smith, 1888)	Euxoa oblongistigma	Euxoa oblongistigma[10 individuals]
1105	Noctuidae	Noctuinae	Noctuini	Euxoa occidentalis Lafontaine & Byers, 1982	Euxoa occidentalis	Euxoa occidentalis[17 individuals]
1106	Noctuidae	Noctuinae	Noctuini	Euxoa ochrogaster (Guenée, 1852)	Euxoa ochrogaster	Euxoa ochrogaster[19 individuals]
1107	Noctuidae	Noctuinae	Noctuini	Euxoa olivalis (Grote, 1879)	Euxoa olivalis	Euxoa olivalis[13 individuals]
1108	Noctuidae	Noctuinae	Noctuini	Euxoa olivia (Morrison, 1876)	Euxoa olivia	Euxoa olivia[4 individuals]
1109	Noctuidae	Noctuinae	Noctuini	Euxoa pallidimacula Lafontaine, 1987	Euxoa pallidimacula	Euxoa pallidimacula[1 individuals]
1110	Noctuidae	Noctuinae	Noctuini	Euxoa pallipennis (Smith, 1888)	Euxoa pallipennis	Euxoa pallipennis[5 individuals]
1111	Noctuidae	Noctuinae	Noctuini	Euxoa perexcellens (Grote, 1875)	Euxoa perexcellens	Euxoa perexcellens[1 individuals]
1112	Noctuidae	Noctuinae	Noctuini	Euxoa perolivalis (Smith, 1905)	Euxoa perolivalis	Euxoa perolivalis[5 individuals]
1113	Noctuidae	Noctuinae	Noctuini	Euxoa perpolita (Morrison, 1876)	Euxoa perpolita	Euxoa perpolita[7 individuals]
1114	Noctuidae	Noctuinae	Noctuini	Euxoa pestula Smith, 1904	Euxoa pestula	Euxoa pestula[4 individuals]
1115	Noctuidae	Noctuinae	Noctuini	Euxoa plagigera (Morrison, 1874)	Euxoa plagigera	Euxoa plagigera[66 individuals]
1116	Noctuidae	Noctuinae	Noctuini	Euxoa pleuritica (Grote, 1876)	Euxoa pleuritica	Euxoa pleuritica[5 individuals]
1117	Noctuidae	Noctuinae	Noctuini	Euxoa pluralis (Grote, 1878)	Euxoa pluralis	Euxoa pluralis[1 individuals]
1118	Noctuidae	Noctuinae	Noctuini	Euxoa punctigera (Walker, 1865)	Euxoa punctigera	Euxoa punctigera[14 individuals]
1119	Noctuidae	Noctuinae	Noctuini	Euxoa quadridentata (Grote & Robinson, 1865)	Euxoa quadridentata	Euxoa quadridentata[41 individuals]
1120	Noctuidae	Noctuinae	Noctuini	Euxoa quebecensis (Smith, 1900)	Euxoa quebecensis	Euxoa quebecensis[19 individuals]
1121	Noctuidae	Noctuinae	Noctuini	Euxoa redimicula (Morrison, 1874)	Euxoa redimicula	Euxoa redimicula[7 individuals]
1122	Noctuidae	Noctuinae	Noctuini	Euxoa ridingsiana (Grote, 1875)	Euxoa ridingsiana	Euxoa ridingsiana[30 individuals]
1123	Noctuidae	Noctuinae	Noctuini	Euxoa rockburnei Hardwick, 1973	Euxoa rockburnei	Euxoa rockburnei[9 individuals]
1124	Noctuidae	Noctuinae	Noctuini	Euxoa rufula (Smith, 1888)	Euxoa rufula	Euxoa rufula[4 individuals]
1125	Noctuidae	Noctuinae	Noctuini	Euxoa satiens (Smith, 1890)	Euxoa satiens	Euxoa satiens[26 individuals]
1126	Noctuidae	Noctuinae	Noctuini	Euxoa satis (Harvey, 1876)	Euxoa satis	Euxoa satis[34 individuals]
1127	Noctuidae	Noctuinae	Noctuini	Euxoa scandens (Riley, 1869)	Euxoa scandens	Euxoa scandens[6 individuals]
1128	Noctuidae	Noctuinae	Noctuini	Euxoa scholastica McDunnough, 1920	Euxoa scholastica	Euxoa scholastica[2 individuals]
1129	Noctuidae	Noctuinae	Noctuini	Euxoa scotogrammoides McDunnough, 1932	Euxoa scotogrammoides	Euxoa scotogrammoides[6 individuals]
1130	Noctuidae	Noctuinae	Noctuini	Euxoa septentrionalis (Walker, 1865)	Euxoa septentrionalis	Euxoa septentrionalis[1 individuals]
1131	Noctuidae	Noctuinae	Noctuini	Euxoa servitus (Smith, 1895)	Euxoa servitus	Euxoa servitus[81 individuals]
1132	Noctuidae	Noctuinae	Noctuini	Euxoa setonia McDunnough, 1927	Euxoa setonia	Euxoa setonia[10 individuals]
1133	Noctuidae	Noctuinae	Noctuini	Euxoa shasta Lafontaine, 1975	Euxoa shasta	Euxoa shasta[4 individuals]
1134	Noctuidae	Noctuinae	Noctuini	Euxoa siccata (Smith, 1893)	Euxoa siccata	Euxoa siccata[4 individuals]
1135	Noctuidae	Noctuinae	Noctuini	Euxoa silens (Grote, 1875)	Euxoa silens	Euxoa silens[10 individuals]
1136	Noctuidae	Noctuinae	Noctuini	Euxoa simona McDunnough, 1932	Euxoa simona	Euxoa simona[5 individuals]
1137	Noctuidae	Noctuinae	Noctuini	Euxoa simulata McDunnough, 1946	Euxoa simulata	Euxoa simulata[1 individuals]
1138	Noctuidae	Noctuinae	Noctuini	Euxoa sinelinea Hardwick, 1965	Euxoa sinelinea	Euxoa sinelinea[9 individuals]
1139	Noctuidae	Noctuinae	Noctuini	Euxoa spumata McDunnough, 1940	Euxoa spumata	Euxoa spumata[2 individuals]
1140	Noctuidae	Noctuinae	Noctuini	Euxoa subandera Lafontaine, 1987	Euxoa subandera	Euxoa subandera[1 individuals]
1141	Noctuidae	Noctuinae	Noctuini	Euxoa taura Smith, 1905	Euxoa taura	Euxoa taura[5 individuals]
1142	Noctuidae	Noctuinae	Noctuini	Euxoa teleboa (Smith, 1890)	Euxoa teleboa	Euxoa teleboa[6 individuals]
1143	Noctuidae	Noctuinae	Noctuini	Euxoa terrenus (Smith, 1900)	Euxoa terrenus	Euxoa terrenus[43 individuals]
1144	Noctuidae	Noctuinae	Noctuini	Euxoa tessellata (Harris, 1841)	Euxoa tessellata	Euxoa tessellata[86 individuals]
1145	Noctuidae	Noctuinae	Noctuini	Euxoa tristicula (Morrison, 1876)	Euxoa tristicula	Euxoa tristicula[9 individuals]
1146	Noctuidae	Noctuinae	Noctuini	Euxoa tronellus (Smith, 1903)	Euxoa tronellus	Euxoa tronellus[9 individuals]
1147	Noctuidae	Noctuinae	Noctuini	Euxoa unica McDunnough, 1940	Euxoa unica	Euxoa unica[1 individuals]
1148	Noctuidae	Noctuinae	Noctuini	Euxoa vallus (Smith, 1900)	Euxoa vallus	Euxoa vallus[1 individuals]
1149	Noctuidae	Noctuinae	Noctuini	Euxoa velleripennis (Grote, 1874)	Euxoa velleripennis	Euxoa velleripennis[11 individuals]
1150	Noctuidae	Noctuinae	Noctuini	Euxoa vetusta (Walker, 1865)	Euxoa vetusta	Euxoa vetusta[7 individuals]
1151	Noctuidae	Noctuinae	Noctuini	Euxoa westermanni (Staudinger, 1857)	Euxoa westermanni	Euxoa westermanni[15 individuals]
1152	Noctuidae	Noctuinae	Noctuini	Euxoa wilsoni (Grote, 1873)	Euxoa wilsoni	Euxoa wilsoni[3 individuals]
1153	Noctuidae	Noctuinae	Noctuini	Feltia beringiana (Lafontaine & Kononenko, 1986)	Feltia beringiana	Feltia beringiana[2 individuals]
1154	Noctuidae	Noctuinae	Noctuini	Feltia boreana (Lafontaine, 1986)	Feltia boreana	Feltia boreana[6 individuals]
1155	Noctuidae	Noctuinae	Noctuini	Feltia geniculata (Grote & Robinson, 1868)	Feltia geniculata	Feltia geniculata[3 individuals]
1156	Noctuidae	Noctuinae	Noctuini	Feltia herilis (Grote, 1873)	Feltia herilis	Feltia herilis[39 individuals]
1157	Noctuidae	Noctuinae	Noctuini	Feltia jaculifera (Guenée, 1852)	Feltia jaculifera	Feltia jaculifera[181 individuals]
1158	Noctuidae	Noctuinae	Noctuini	Feltia manifesta (Morrison, 1875)	Feltia manifesta	Feltia manifesta[4 individuals]
1159	Noctuidae	Noctuinae	Noctuini	Feltia mollis (Walker, [1857])	Feltia mollis	Feltia mollis[22 individuals]
1160	Noctuidae	Noctuinae	Noctuini	Feltia nigrita (Graeser, 1892)	Feltia nigrita	Feltia nigrita[13 individuals]
1161	Noctuidae	Noctuinae	Noctuini	Feltia subgothica (Haworth, 1809)	Feltia subgothica	Feltia subgothica[12 individuals]
1162	Noctuidae	Noctuinae	Noctuini	Feltia subterranea (Fabricius, 1794)	Feltia subterranea	Feltia subterranea[59 individuals]
1163	Noctuidae	Noctuinae	Noctuini	Feltia tricosa (Lintner, 1874)	Feltia tricosa	Feltia tricosa[24 individuals]
1164	Noctuidae	Noctuinae	Noctuini	Feltia troubridgei Lafontaine, 2004	Feltia troubridgei	Feltia troubridgei[1 individuals]
1165	Noctuidae	Noctuinae	Noctuini	Feltia woodiana (Lafontaine, 1986)	Feltia woodiana	Feltia woodiana[4 individuals]
1166	Noctuidae	Noctuinae	Noctuini	Graphiphora augur (Fabricius, 1775)	Graphiphora augur	Graphiphora augur[151 individuals]
1167	Noctuidae	Noctuinae	Noctuini	Hemipachnobia monochromatea (Morrison, 1874)	Hemipachnobia monochromatea	Hemipachnobia monochromatea[4 individuals]
1168	Noctuidae	Noctuinae	Noctuini	Lycophotia phyllophora (Grote, 1874)	Lycophotia phyllophora	Lycophotia phyllophora[57 individuals]
1169	Noctuidae	Noctuinae	Noctuini	Noctua comes Hübner, [1813]	Noctua comes	Noctua comes[16 individuals]
1170	Noctuidae	Noctuinae	Noctuini	Noctua pronuba (Linnaeus, 1758)	Noctua pronuba	Noctua pronuba[112 individuals]
1171	Noctuidae	Noctuinae	Noctuini	Ochropleura implecta Lafontaine, 1998	Ochropleura implecta	Ochropleura implecta[139 individuals]
1172	Noctuidae	Noctuinae	Noctuini	Parabagrotis cupidissima (Grote, 1875)	Parabagrotis cupidissima	Parabagrotis cupidissima[1 individuals]
1173	Noctuidae	Noctuinae	Noctuini	Parabagrotis exsertistigma (Morrison, 1874)	Parabagrotis exsertistigma	Parabagrotis exsertistigma[139 individuals]
1174	Noctuidae	Noctuinae	Noctuini	Parabagrotis formalis (Grote, 1874)	Parabagrotis formalis	Parabagrotis formalis[1 individuals]
1175	Noctuidae	Noctuinae	Noctuini	Parabagrotis insularis (Grote, 1876)	Parabagrotis insularis	Parabagrotis insularis[33 individuals]
1176	Noctuidae	Noctuinae	Noctuini	Parabagrotis sulinaris Lafontaine, 1998	Parabagrotis sulinaris	Parabagrotis sulinaris[18 individuals]
1177	Noctuidae	Noctuinae	Noctuini	Parabarrovia keelei Gibson, 1920	Parabarrovia keelei	Parabarrovia keelei[3 individuals]
1178	Noctuidae	Noctuinae	Noctuini	Parabarrovia ogilviensis Lafontaine, 1988	Parabarrovia ogilviensis	Parabarrovia ogilviensis[6 individuals]
1179	Noctuidae	Noctuinae	Noctuini	Paradiarsia littoralis (Packard, 1867)	Paradiarsia littoralis	Paradiarsia littoralis[51 individuals]
1180	Noctuidae	Noctuinae	Noctuini	Peridroma saucia (Hübner, [1808])	Peridroma saucia	Peridroma saucia[12 individuals]
1181	Noctuidae	Noctuinae	Noctuini	Prognorisma substrigata (Smith, 1895)	Prognorisma substrigata	Prognorisma substrigata[27 individuals]
1182	Noctuidae	Noctuinae	Noctuini	Pronoctua craboi Lafontaine, 1998	Pronoctua craboi	Pronoctua craboi[4 individuals]
1183	Noctuidae	Noctuinae	Noctuini	Pronoctua peabodyae (Dyar, 1903)	Pronoctua peabodyae	Pronoctua peabodyae[2 individuals]
1184	Noctuidae	Noctuinae	Noctuini	Pronoctua typica Smith, 1894	Pronoctua typica	Pronoctua typica[6 individuals]
1185	Noctuidae	Noctuinae	Noctuini	Protogygia alberta Troubridge & Lafontaine, 2004	Protogygia alberta	Protogygia alberta[1 individuals]
1186	Noctuidae	Noctuinae	Noctuini	Protogygia enalaga McDunnough, 1932	Protogygia enalaga	Protogygia enalaga[2 individuals]
1187	Noctuidae	Noctuinae	Noctuini	Protogygia postera Fauske & Lafontaine, 2004	Protogygia postera	Protogygia postera[1 individuals]
1188	Noctuidae	Noctuinae	Noctuini	Protogygia querula (Dod, 1915)	Protogygia querula	Protogygia querula[2 individuals]
1189	Noctuidae	Noctuinae	Noctuini	Protolampra brunneicollis (Grote, 1865)	Protolampra brunneicollis	Protolampra brunneicollis[9 individuals]
1190	Noctuidae	Noctuinae	Noctuini	Protolampra rufipectus (Morrison, 1875)	Protolampra rufipectus	Protolampra rufipectus[65 individuals]
1191	Noctuidae	Noctuinae	Noctuini	Pseudohermonassa bicarnea (Guenée, 1852)	Pseudohermonassa bicarnea	Pseudohermonassa bicarnea[25 individuals]
1192	Noctuidae	Noctuinae	Noctuini	Pseudohermonassa flavotincta (Smith, 1892)	Pseudohermonassa flavotincta	Pseudohermonassa flavotincta[14 individuals]
1193	Noctuidae	Noctuinae	Noctuini	Pseudohermonassa tenuicula (Morrison, 1874)	Pseudohermonassa tenuicula	Pseudohermonassa tenuicula[21 individuals]
1194	Noctuidae	Noctuinae	Noctuini	Rhyacia clemens (Smith, 1890)	Rhyacia clemens	Rhyacia clemens[1 individuals]
1195	Noctuidae	Noctuinae	Noctuini	Rhyacia quadrangula (Zetterstedt, 1839)	Rhyacia quadrangula	Rhyacia quadrangula[87 individuals]
1196	Noctuidae	Noctuinae	Noctuini	Setagrotis pallidicollis (Grote, 1880)	Setagrotis pallidicollis	Setagrotis pallidicollis[17 individuals]
1197	Noctuidae	Noctuinae	Noctuini	Setagrotis radiola (Hampson, 1903)	Setagrotis radiola	Setagrotis radiola[1 individuals]
1198	Noctuidae	Noctuinae	Noctuini	Setagrotis vocalis (Grote, 1879)	Setagrotis vocalis	Setagrotis vocalis[6 individuals]
1199	Noctuidae	Noctuinae	Noctuini	Spaelotis bicava Lafontaine, 1998	Spaelotis bicava	Spaelotis bicava[5 individuals]
1200	Noctuidae	Noctuinae	Noctuini	Spaelotis clandestina (Harris, 1841)	Spaelotis clandestina	Spaelotis clandestina[48 individuals]
1201	Noctuidae	Noctuinae	Noctuini	Tesagrotis atrifrons (Grote, 1873)	Tesagrotis atrifrons	Tesagrotis atrifrons[3 individuals]
1202	Noctuidae	Noctuinae	Noctuini	Tesagrotis corrodera (Smith, 1907)	Tesagrotis corrodera	Tesagrotis corrodera[2 individuals]
1203	Noctuidae	Noctuinae	Noctuini	Tesagrotis piscipellis (Grote, 1878)	Tesagrotis piscipellis	Tesagrotis piscipellis[5 individuals]
1204	Noctuidae	Noctuinae	Noctuini	Xestia aequaeva (Benjamin, 1934)	Xestia aequaeva	Xestia aequaeva[3 individuals]
1205	Noctuidae	Noctuinae	Noctuini	Xestia alaskae (Grote, 1876)	Xestia alaskae	Xestia alaskae[1 individuals]
1206	Noctuidae	Noctuinae	Noctuini	Xestia albuncula (Eversmann, 1851)	Xestia albuncula	Xestia albuncula[3 individuals]
1207	Noctuidae	Noctuinae	Noctuini	Xestia atrata (Morrison, 1874)	Xestia atrata	Xestia atrata[19 individuals]
1208	Noctuidae	Noctuinae	Noctuini	Xestia badicollis (Grote, 1873)	Xestia badicollis	Xestia badicollis[36 individuals]
1209	Noctuidae	Noctuinae	Noctuini	Xestia bryanti (Benjamin, 1933)	Xestia bryanti	Xestia bryanti[4 individuals]
1210	Noctuidae	Noctuinae	Noctuini	Xestia c-nigrum (Linnaeus, 1758)	Xestia c-nigrum	Xestia c-nigrum[161 individuals]
1211	Noctuidae	Noctuinae	Noctuini	Xestia dilucida (Morrison, 1875)	Xestia dilucida	Xestia dilucida[80 individuals]
1212	Noctuidae	Noctuinae	Noctuini	Xestia dolosa Franclemont, 1980	Xestia dolosa	Xestia dolosa[7 individuals]
1213	Noctuidae	Noctuinae	Noctuini	Xestia fabulosa (Ferguson, 1965)	Xestia fabulosa	Xestia fabulosa[41 individuals]
1214	Noctuidae	Noctuinae	Noctuini	Xestia fergusoni Lafontaine, 1983	Xestia fergusoni	Xestia fergusoni
1215	Noctuidae	Noctuinae	Noctuini	Xestia finatimis Lafontaine, 1998	Xestia finatimis	Xestia finatimis[25 individuals]
1216	Noctuidae	Noctuinae	Noctuini	Xestia homogena (McDunnough, 1921)	Xestia homogena	Xestia homogena[123 individuals]
1217	Noctuidae	Noctuinae	Noctuini	Xestia imperita (Hübner, [1831])	Xestia imperita	Xestia imperita[147 individuals]
1218	Noctuidae	Noctuinae	Noctuini	Xestia infimatis (Grote, 1880)	Xestia infimatis	Xestia infimatis[3 individuals]
1219	Noctuidae	Noctuinae	Noctuini	Xestia intermedia (Kononenko, 1981)	Xestia intermedia	Xestia intermedia[4 individuals]
1220	Noctuidae	Noctuinae	Noctuini	Xestia inuitica Lafontaine & Hensel, 1998	Xestia inuitica	Xestia inuitica[4 individuals]
1221	Noctuidae	Noctuinae	Noctuini	Xestia kolymae (Herz, 1903)	Xestia kolymae	Xestia kolymae[3 individuals]
1222	Noctuidae	Noctuinae	Noctuini	Xestia laxa Lafontaine & Mikkola, 1998	Xestia laxa	Xestia laxa[2 individuals]
1223	Noctuidae	Noctuinae	Noctuini	Xestia liquidaria (Eversmann, 1848)	Xestia liquidaria	Xestia liquidaria[2 individuals]
1224	Noctuidae	Noctuinae	Noctuini	Xestia lorezi (Staudinger, 1891)	Xestia lorezi	Xestia lorezi[2 individuals]
1225	Noctuidae	Noctuinae	Noctuini	Xestia lupa Lafontaine & Mikkola, 1998	Xestia lupa	Xestia lupa[4 individuals]
1226	Noctuidae	Noctuinae	Noctuini	Xestia lyngei (Rebel, 1923)	Xestia lyngei	Xestia lyngei[5 individuals]
1227	Noctuidae	Noctuinae	Noctuini	Xestia maculata (Smith, 1893)	Xestia maculata	Xestia maculata[4 individuals]
1228	Noctuidae	Noctuinae	Noctuini	Xestia mixta (Walker, 1856)	Xestia mixta	Xestia mixta[25 individuals]
1229	Noctuidae	Noctuinae	Noctuini	Xestia mustelina (Smith, 1900)	Xestia mustelina	Xestia mustelina[20 individuals]
1230	Noctuidae	Noctuinae	Noctuini	Xestia normanianus (Grote, 1874)	Xestia normanianus	Xestia normanianus[37 individuals]
1231	Noctuidae	Noctuinae	Noctuini	Xestia oblata (Morrison, 1875)	Xestia oblata	Xestia oblata[76 individuals]
1232	Noctuidae	Noctuinae	Noctuini	Xestia okakensis (Packard, 1867)	Xestia okakensis	Xestia okakensis[15 individuals]
1233	Noctuidae	Noctuinae	Noctuini	Xestia perquiritata (Morrison, 1874)	Xestia perquiritata	Xestia perquiritata[98 individuals]
1234	Noctuidae	Noctuinae	Noctuini	Xestia plebeia (Smith, 1898)	Xestia plebeia	Xestia plebeia[7 individuals]
1235	Noctuidae	Noctuinae	Noctuini	Xestia praevia Lafontaine, 1998	Xestia praevia	Xestia praevia[13 individuals]
1236	Noctuidae	Noctuinae	Noctuini	Xestia quieta (Hübner, [1813])	Xestia quieta	Xestia quieta[3 individuals]
1237	Noctuidae	Noctuinae	Noctuini	Xestia scropulana (Morrison, 1874)	Xestia scropulana	Xestia scropulana[37 individuals]
1238	Noctuidae	Noctuinae	Noctuini	Xestia smithii (Snellen, 1896)	Xestia smithii	Xestia smithii[230 individuals]
1239	Noctuidae	Noctuinae	Noctuini	Xestia speciosa (Hübner, [1813])	Xestia speciosa	Xestia speciosa[167 individuals]
1240	Noctuidae	Noctuinae	Noctuini	Xestia staudingeri (Möschler, 1862)	Xestia staudingeri	Xestia staudingeri
1241	Noctuidae	Noctuinae	Noctuini	Xestia tecta (Hübner, [1808])	Xestia tecta	Xestia tecta[8 individuals]
1242	Noctuidae	Noctuinae	Noctuini	Xestia thula Lafontaine & Kononenko, 1983	Xestia thula	Xestia thula[1 individuals]
1243	Noctuidae	Noctuinae	Noctuini	Xestia ursae (McDunnough, 1940)	Xestia ursae	Xestia ursae[34 individuals]
1244	Noctuidae	Noctuinae	Noctuini	Xestia vernilis (Grote, 1879)	Xestia vernilis	Xestia vernilis[14 individuals]
1245	Noctuidae	Noctuinae	Noctuini	Xestia verniloides Lafontaine, 1998	Xestia verniloides	Xestia verniloides[3 individuals]
1246	Noctuidae	Noctuinae	Noctuini	Xestia wockei (Möschler, 1862)	Xestia wockei	Xestia wockei[2 individuals]
1247	Noctuidae	Noctuinae	Noctuini	Xestia woodi Lafontaine & Kononenko, 1983	Xestia woodi	Xestia woodi[2 individuals]
1248	Noctuidae	Noctuinae	Noctuini	Xestia xanthographa ([Denis & Schiffermüller], [1775])	Xestia xanthographa	Xestia xanthographa[48 individuals]
1249	Noctuidae	Noctuinae	Orthosiini	Acerra normalis Grote, 1874	Acerra normalis	Acerra normalis[7 individuals]
1250	Noctuidae	Noctuinae	Orthosiini	Achatia distincta Hübner, 1813	Achatia distincta	Achatia distincta[14 individuals]
1251	Noctuidae	Noctuinae	Orthosiini	Admetovis oxymorus Grote, 1873	Admetovis oxymorus	Admetovis oxymorus[4 individuals]
1252	Noctuidae	Noctuinae	Orthosiini	Admetovis similaris Barnes, 1904	Admetovis similaris	Admetovis similaris[1 individuals]
1253	Noctuidae	Noctuinae	Orthosiini	Crocigrapha normani (Grote, 1874)	Crocigrapha normani	Crocigrapha normani[46 individuals]
1254	Noctuidae	Noctuinae	Orthosiini	Egira alternans (Walker, [1857])	Egira alternans	Egira alternans[12 individuals]
1255	Noctuidae	Noctuinae	Orthosiini	Egira cognata (Smith, 1894)	Egira cognata	Egira cognata[17 individuals]
1256	Noctuidae	Noctuinae	Orthosiini	Egira crucialis (Harvey, 1875)	Egira crucialis	Egira crucialis[8 individuals]
1257	Noctuidae	Noctuinae	Orthosiini	Egira curialis (Grote, 1873)	Egira curialis	Egira curialis[17 individuals]
1258	Noctuidae	Noctuinae	Orthosiini	Egira dolosa (Grote, 1880)	Egira dolosa	Egira dolosa[65 individuals]
1259	Noctuidae	Noctuinae	Orthosiini	Egira hiemalis (Grote, 1874)	Egira hiemalis	Egira hiemalis[5 individuals]
1260	Noctuidae	Noctuinae	Orthosiini	Egira perlubens (Grote, 1881)	Egira perlubens	Egira perlubens[13 individuals]
1261	Noctuidae	Noctuinae	Orthosiini	Egira rubrica (Harvey, 1878)	Egira rubrica	Egira rubrica[5 individuals]
1262	Noctuidae	Noctuinae	Orthosiini	Egira simplex (Walker, 1865)	Egira simplex	Egira simplex[11 individuals]
1263	Noctuidae	Noctuinae	Orthosiini	Egira variabilis (Smith, 1891)	Egira variabilis	Egira variabilis[8 individuals]
1264	Noctuidae	Noctuinae	Orthosiini	Himella fidelis Grote, 1874	Himella fidelis	Himella fidelis[2 individuals]
1265	Noctuidae	Noctuinae	Orthosiini	Morrisonia confusa (Hübner, [1831])	Morrisonia confusa	Morrisonia confusa[34 individuals]
1266	Noctuidae	Noctuinae	Orthosiini	Morrisonia evicta (Grote, 1873)	Morrisonia evicta	Morrisonia evicta[22 individuals]
1267	Noctuidae	Noctuinae	Orthosiini	Morrisonia latex (Guenée, 1852)	Morrisonia latex	Morrisonia latex[19 individuals]
1268	Noctuidae	Noctuinae	Orthosiini	Orthosia alurina (Smith, 1902)	Orthosia alurina	Orthosia alurina[6 individuals]
1269	Noctuidae	Noctuinae	Orthosiini	Orthosia ferrigera (Smith, 1894)	Orthosia ferrigera	Orthosia ferrigera[9 individuals]
1270	Noctuidae	Noctuinae	Orthosiini	Orthosia garmani (Grote, 1879)	Orthosia garmani	Orthosia garmani[1 individuals]
1271	Noctuidae	Noctuinae	Orthosiini	Orthosia hibisci (Guenée, 1852)	Orthosia hibisci	Orthosia hibisci[78 individuals]
1272	Noctuidae	Noctuinae	Orthosiini	Orthosia mys (Dyar, 1903)	Orthosia mys	Orthosia mys[2 individuals]
1273	Noctuidae	Noctuinae	Orthosiini	Orthosia pacifica (Harvey, 1874)	Orthosia pacifica	Orthosia pacifica[5 individuals]
1274	Noctuidae	Noctuinae	Orthosiini	Orthosia praeses (Grote, 1879)	Orthosia praeses	Orthosia praeses[7 individuals]
1275	Noctuidae	Noctuinae	Orthosiini	Orthosia pulchella (Harvey, 1876)	Orthosia pulchella	Orthosia pulchella[2 individuals]
1276	Noctuidae	Noctuinae	Orthosiini	Orthosia revicta (Morrison, 1876)	Orthosia revicta	Orthosia revicta[36 individuals]
1277	Noctuidae	Noctuinae	Orthosiini	Orthosia rubescens (Walker, 1865)	Orthosia rubescens	Orthosia rubescens[9 individuals]
1278	Noctuidae	Noctuinae	Orthosiini	Orthosia segregata (Smith, 1893)	Orthosia segregata	Orthosia segregata[19 individuals]
1279	Noctuidae	Noctuinae	Orthosiini	Orthosia transparens (Grote, 1882)	Orthosia transparens	Orthosia transparens[5 individuals]
1280	Noctuidae	Noctuinae	Orthosiini	Stretchia muricina (Grote, 1876)	Stretchia muricina	Stretchia muricina[9 individuals]
1281	Noctuidae	Noctuinae	Orthosiini	Stretchia plusiaeformis Hy. Edwards, 1874	Stretchia plusiaeformis	Stretchia plusiaeformis[8 individuals]
1282	Noctuidae	Noctuinae	Phlogophorini	Conservula anodonta (Guenée, 1852)	Conservula anodonta	Conservula anodonta[3 individuals]
1283	Noctuidae	Noctuinae	Phlogophorini	Euplexia benesimilis McDunnough, 1922	Euplexia benesimilis	Euplexia benesimilis[91 individuals]
1284	Noctuidae	Noctuinae	Phlogophorini	Phlogophora iris Guenée, 1852	Phlogophora iris	Phlogophora iris[44 individuals]
1285	Noctuidae	Noctuinae	Phlogophorini	Phlogophora periculosa Guenée, 1852	Phlogophora periculosa	Phlogophora periculosa[80 individuals]
1286	Noctuidae	Noctuinae	Phosphilini	Phosphila miselioides (Guenée, 1852)	Phosphila miselioides	Phosphila miselioides[4 individuals]
1287	Noctuidae	Noctuinae	Phosphilini	Phosphila turbulenta Hübner, 1818	Phosphila turbulenta	Phosphila turbulenta[1 individuals]
1288	Noctuidae	Noctuinae	Prodeniini	Spodoptera exigua (Hübner, [1808])	Spodoptera exigua	Spodoptera exigua[1 individuals]
1289	Noctuidae	Noctuinae	Prodeniini	Spodoptera frugiperda (J.E. Smith, 1797)	Spodoptera frugiperda	Spodoptera frugiperda[18 individuals]
1290	Noctuidae	Noctuinae	Prodeniini	Spodoptera ornithogalli (Guenée, 1852)	Spodoptera ornithogalli	Spodoptera ornithogalli[2 individuals]
1291	Noctuidae	Noctuinae	Prodeniini	Spodoptera praefica (Grote, 1875)	Spodoptera praefica	Spodoptera praefica[2 individuals]
1292	Noctuidae	Noctuinae	Pseudeustrotiini	Anterastria teratophora (Herrich-Schäffer, [1854])	Anterastria teratophora	Anterastria teratophora[4 individuals]
1293	Noctuidae	Noctuinae	Pseudeustrotiini	Pseudeustrotia carneola (Guenée, 1852)	Pseudeustrotia carneola	Pseudeustrotia carneola[50 individuals]
1294	Noctuidae	Noctuinae	Tholerini	Cerapteryx graminis (Linnaeus, 1758)	Cerapteryx graminis	Cerapteryx graminis[4 individuals]
1295	Noctuidae	Noctuinae	Tholerini	Nephelodes minians Guenée, 1852	Nephelodes minians	Nephelodes minians[79 individuals]
1296	Noctuidae	Noctuinae	Tholerini	Tholera americana (Smith, 1894)	Tholera americana	Tholera americana[80 individuals]
1297	Noctuidae	Noctuinae	Xylenini	Agrochola lota (Clerck, 1759)	Agrochola lota	Agrochola lota[1 individuals]
1298	Noctuidae	Noctuinae	Xylenini	Agrochola pulchella (Smith, 1900)	Agrochola pulchella	Agrochola pulchella[3 individuals]
1299	Noctuidae	Noctuinae	Xylenini	Agrochola purpurea (Grote, 1874)	Agrochola purpurea	Agrochola purpurea[2 individuals]
1300	Noctuidae	Noctuinae	Xylenini	Anathix aggressa (Smith, 1907)	Anathix aggressa	Anathix aggressa[3 individuals]
1301	Noctuidae	Noctuinae	Xylenini	Anathix puta (Grote & Robinson, 1868)	Anathix puta	Anathix puta[17 individuals]
1302	Noctuidae	Noctuinae	Xylenini	Anathix ralla (Grote & Robinson, 1868)	Anathix ralla	Anathix ralla[5 individuals]
1303	Noctuidae	Noctuinae	Xylenini	Andropolia aedon (Grote, 1880)	Andropolia aedon	Andropolia aedon[5 individuals]
1304	Noctuidae	Noctuinae	Xylenini	Andropolia contacta (Walker, 1856)	Andropolia contacta	Andropolia contacta[10 individuals]
1305	Noctuidae	Noctuinae	Xylenini	Andropolia diversilineata (Grote, 1877)	Andropolia diversilineata	Andropolia diversilineata[13 individuals]
1306	Noctuidae	Noctuinae	Xylenini	Andropolia theodori (Grote, 1878)	Andropolia theodori	Andropolia theodori[4 individuals]
1307	Noctuidae	Noctuinae	Xylenini	Aseptis adnixa (Grote, 1880)	Aseptis adnixa	Aseptis adnixa[12 individuals]
1308	Noctuidae	Noctuinae	Xylenini	Aseptis binotata (Walker, 1865)	Aseptis binotata	Aseptis binotata[77 individuals]
1309	Noctuidae	Noctuinae	Xylenini	Aseptis characta (Grote, 1880)	Aseptis characta	Aseptis characta[5 individuals]
1310	Noctuidae	Noctuinae	Xylenini	Aseptis fumosa (Grote, 1879)	Aseptis fumosa	Aseptis fumosa[17 individuals]
1311	Noctuidae	Noctuinae	Xylenini	Brachylomia algens (Grote, 1878)	Brachylomia algens	Brachylomia algens[7 individuals]
1312	Noctuidae	Noctuinae	Xylenini	Brachylomia cascadia Troubridge & Lafontaine, 2007	Brachylomia cascadia	Brachylomia cascadia[5 individuals]
1313	Noctuidae	Noctuinae	Xylenini	Brachylomia discinigra (Walker, 1856)	Brachylomia discinigra	Brachylomia discinigra[3 individuals]
1314	Noctuidae	Noctuinae	Xylenini	Brachylomia populi (Strecker, 1898)	Brachylomia populi	Brachylomia populi[5 individuals]
1315	Noctuidae	Noctuinae	Xylenini	Brachylomia rectifascia (Smith, 1891)	Brachylomia rectifascia	Brachylomia rectifascia[2 individuals]
1316	Noctuidae	Noctuinae	Xylenini	Brachylomia thula (Strecker, 1898)	Brachylomia thula	Brachylomia thula[3 individuals]
1317	Noctuidae	Noctuinae	Xylenini	Chaetaglaea cerata Franclemont, 1943	Chaetaglaea cerata	Chaetaglaea cerata[2 individuals]
1318	Noctuidae	Noctuinae	Xylenini	Chaetaglaea sericea (Morrison, 1874)	Chaetaglaea sericea	Chaetaglaea sericea[3 individuals]
1319	Noctuidae	Noctuinae	Xylenini	Chaetaglaea tremula (Harvey, 1875)	Chaetaglaea tremula	Chaetaglaea tremula[3 individuals]
1320	Noctuidae	Noctuinae	Xylenini	Cosmia calami (Harvey, 1876)	Cosmia calami	Cosmia calami[55 individuals]
1321	Noctuidae	Noctuinae	Xylenini	Cosmia elisae Lafontaine & Troubridge, 2003	Cosmia elisae	Cosmia elisae[29 individuals]
1322	Noctuidae	Noctuinae	Xylenini	Cosmia praeacuta (Smith, 1894)	Cosmia praeacuta	Cosmia praeacuta[69 individuals]
1323	Noctuidae	Noctuinae	Xylenini	Dryotype opina (Grote, 1878)	Dryotype opina	Dryotype opina[4 individuals]
1324	Noctuidae	Noctuinae	Xylenini	Enargia decolor (Walker, 1858)	Enargia decolor	Enargia decolor[58 individuals]
1325	Noctuidae	Noctuinae	Xylenini	Enargia fausta Schmidt, 2010	Enargia fausta	Enargia fausta[7 individuals]
1326	Noctuidae	Noctuinae	Xylenini	Enargia infumata (Grote, 1874)	Enargia infumata	Enargia infumata[52 individuals]
1327	Noctuidae	Noctuinae	Xylenini	Epidemas cinerea Smith, 1894	Epidemas cinerea	Epidemas cinerea[23 individuals]
1328	Noctuidae	Noctuinae	Xylenini	Epidemas obscurus Smith, 1903	Epidemas obscurus	Epidemas obscurus[8 individuals]
1329	Noctuidae	Noctuinae	Xylenini	Epiglaea apiata (Grote, 1874)	Epiglaea apiata	Epiglaea apiata[10 individuals]
1330	Noctuidae	Noctuinae	Xylenini	Epiglaea decliva (Grote, 1874)	Epiglaea decliva	Epiglaea decliva[1 individuals]
1331	Noctuidae	Noctuinae	Xylenini	Eucirroedia pampina (Guenée, 1852)	Eucirroedia pampina	Eucirroedia pampina[14 individuals]
1332	Noctuidae	Noctuinae	Xylenini	Eupsilia devia (Grote, 1875)	Eupsilia devia	Eupsilia devia[5 individuals]
1333	Noctuidae	Noctuinae	Xylenini	Eupsilia fringata (Barnes & McDunnough, 1916)	Eupsilia fringata	Eupsilia fringata
1334	Noctuidae	Noctuinae	Xylenini	Eupsilia morrisoni (Grote, 1874)	Eupsilia morrisoni	Eupsilia morrisoni[23 individuals]
1335	Noctuidae	Noctuinae	Xylenini	Eupsilia sidus (Guenée, 1852)	Eupsilia sidus	Eupsilia sidus[9 individuals]
1336	Noctuidae	Noctuinae	Xylenini	Eupsilia tristigmata (Grote, 1877)	Eupsilia tristigmata	Eupsilia tristigmata[14 individuals]
1337	Noctuidae	Noctuinae	Xylenini	Eupsilia vinulenta (Grote, 1864)	Eupsilia vinulenta	Eupsilia vinulenta[4 individuals]
1338	Noctuidae	Noctuinae	Xylenini	Fishia discors (Grote, 1881)	Fishia discors	Fishia discors[26 individuals]
1339	Noctuidae	Noctuinae	Xylenini	Fishia illocata (Walker, 1857)	Fishia illocata	Fishia illocata[39 individuals]
1340	Noctuidae	Noctuinae	Xylenini	Fishia yosemitae (Grote, 1873)	Fishia yosemitae	Fishia yosemitae[18 individuals]
1341	Noctuidae	Noctuinae	Xylenini	Hillia iris (Zetterstedt, 1839)	Hillia iris	Hillia iris[408 individuals]
1342	Noctuidae	Noctuinae	Xylenini	Hillia maida (Dyar, 1904)	Hillia maida	Hillia maida[2 individuals]
1343	Noctuidae	Noctuinae	Xylenini	Homoglaea californica (Smith, 1891)	Homoglaea californica	Homoglaea californica[1 individuals]
1344	Noctuidae	Noctuinae	Xylenini	Homoglaea carbonaria (Harvey, 1876)	Homoglaea carbonaria	Homoglaea carbonaria[8 individuals]
1345	Noctuidae	Noctuinae	Xylenini	Homoglaea dives Smith, 1907	Homoglaea dives	Homoglaea dives[5 individuals]
1346	Noctuidae	Noctuinae	Xylenini	Homoglaea hircina Morrison, 1876	Homoglaea hircina	Homoglaea hircina[5 individuals]
1347	Noctuidae	Noctuinae	Xylenini	Hyppa brunneicrista Smith, 1902	Hyppa brunneicrista	Hyppa brunneicrista[15 individuals]
1348	Noctuidae	Noctuinae	Xylenini	Hyppa contrasta McDunnough, 1946	Hyppa contrasta	Hyppa contrasta[73 individuals]
1349	Noctuidae	Noctuinae	Xylenini	Hyppa indistincta Smith, 1894	Hyppa indistincta	Hyppa indistincta[20 individuals]
1350	Noctuidae	Noctuinae	Xylenini	Hyppa potamus Troubridge & Lafontaine, 2004	Hyppa potamus	Hyppa potamus[2 individuals]
1351	Noctuidae	Noctuinae	Xylenini	Hyppa xylinoides (Guenée, 1852)	Hyppa xylinoides	Hyppa xylinoides[43 individuals]
1352	Noctuidae	Noctuinae	Xylenini	Ipimorpha nanaimo Barnes, 1905	Ipimorpha nanaimo	Ipimorpha nanaimo[20 individuals]
1353	Noctuidae	Noctuinae	Xylenini	Ipimorpha pleonectusa Grote, 1873	Ipimorpha pleonectusa	Ipimorpha pleonectusa[33 individuals]
1354	Noctuidae	Noctuinae	Xylenini	Ipimorpha viridipallida Barnes & McDunnough, 1916	Ipimorpha viridipallida	Ipimorpha viridipallida[3 individuals]
1355	Noctuidae	Noctuinae	Xylenini	Litholomia napaea (Morrison, 1874)	Litholomia napaea	Litholomia napaea[35 individuals]
1356	Noctuidae	Noctuinae	Xylenini	Lithomoia germana (Morrison, 1875)	Lithomoia germana	Lithomoia germana[34 individuals]
1357	Noctuidae	Noctuinae	Xylenini	Lithophane adipel (Benjamin, 1936)	Lithophane adipel	Lithophane adipel[1 individuals]
1358	Noctuidae	Noctuinae	Xylenini	Lithophane amanda (Smith, 1900)	Lithophane amanda	Lithophane amanda[5 individuals]
1359	Noctuidae	Noctuinae	Xylenini	Lithophane antennata (Walker, 1858)	Lithophane antennata	Lithophane antennata[8 individuals]
1360	Noctuidae	Noctuinae	Xylenini	Lithophane atara (Smith, 1909)	Lithophane atara	Lithophane atara[5 individuals]
1361	Noctuidae	Noctuinae	Xylenini	Lithophane baileyi Grote, 1877	Lithophane baileyi	Lithophane baileyi[12 individuals]
1362	Noctuidae	Noctuinae	Xylenini	Lithophane bethunei (Grote & Robinson, 1868)	Lithophane bethunei	Lithophane bethunei[16 individuals]
1363	Noctuidae	Noctuinae	Xylenini	Lithophane contenta Grote, 1880	Lithophane contenta	Lithophane contenta[2 individuals]
1364	Noctuidae	Noctuinae	Xylenini	Lithophane dilatocula (Smith, 1900)	Lithophane dilatocula	Lithophane dilatocula[1 individuals]
1365	Noctuidae	Noctuinae	Xylenini	Lithophane disposita Morrison, 1874	Lithophane disposita	Lithophane disposita[3 individuals]
1366	Noctuidae	Noctuinae	Xylenini	Lithophane fagina Morrison, 1874	Lithophane fagina	Lithophane fagina[24 individuals]
1367	Noctuidae	Noctuinae	Xylenini	Lithophane georgii Grote, 1875	Lithophane georgii	Lithophane georgii[9 individuals]
1368	Noctuidae	Noctuinae	Xylenini	Lithophane grotei (Riley, 1882)	Lithophane grotei	Lithophane grotei[16 individuals]
1369	Noctuidae	Noctuinae	Xylenini	Lithophane hemina Grote, 1874	Lithophane hemina	Lithophane hemina[25 individuals]
1370	Noctuidae	Noctuinae	Xylenini	Lithophane innominata (Smith, 1893)	Lithophane innominata	Lithophane innominata[33 individuals]
1371	Noctuidae	Noctuinae	Xylenini	Lithophane itata (Smith, 1899)	Lithophane itata	Lithophane itata[4 individuals]
1372	Noctuidae	Noctuinae	Xylenini	Lithophane lanei Troubridge, 2006	Lithophane lanei	Lithophane lanei[9 individuals]
1373	Noctuidae	Noctuinae	Xylenini	Lithophane laticinerea Grote, 1874	Lithophane laticinerea	Lithophane laticinerea[13 individuals]
1374	Noctuidae	Noctuinae	Xylenini	Lithophane lepida Grote, 1878	Lithophane lepida	Lithophane lepida[1 individuals]
1375	Noctuidae	Noctuinae	Xylenini	Lithophane oriunda Grote, 1874	Lithophane oriunda	Lithophane oriunda[8 individuals]
1376	Noctuidae	Noctuinae	Xylenini	Lithophane patefacta (Walker, 1858)	Lithophane patefacta	Lithophane patefacta[11 individuals]
1377	Noctuidae	Noctuinae	Xylenini	Lithophane pertorrida (McDunnough, 1942)	Lithophane pertorrida	Lithophane pertorrida[9 individuals]
1378	Noctuidae	Noctuinae	Xylenini	Lithophane petulca Grote, 1874	Lithophane petulca	Lithophane petulca[14 individuals]
1379	Noctuidae	Noctuinae	Xylenini	Lithophane pexata Grote, 1874	Lithophane pexata	Lithophane pexata[5 individuals]
1380	Noctuidae	Noctuinae	Xylenini	Lithophane ponderosa Troubridge & Lafontaine, 2003	Lithophane ponderosa	Lithophane ponderosa[7 individuals]
1381	Noctuidae	Noctuinae	Xylenini	Lithophane querquera Grote, 1874	Lithophane querquera	Lithophane querquera[5 individuals]
1382	Noctuidae	Noctuinae	Xylenini	Lithophane scottae Troubridge, 2006	Lithophane scottae	Lithophane scottae[1 individuals]
1383	Noctuidae	Noctuinae	Xylenini	Lithophane semiusta Grote, 1874	Lithophane semiusta	Lithophane semiusta[2 individuals]
1384	Noctuidae	Noctuinae	Xylenini	Lithophane signosa (Walker, 1857)	Lithophane signosa	Lithophane signosa[5 individuals]
1385	Noctuidae	Noctuinae	Xylenini	Lithophane tepida Grote, 1874	Lithophane tepida	Lithophane tepida[3 individuals]
1386	Noctuidae	Noctuinae	Xylenini	Lithophane thaxteri Grote, 1874	Lithophane thaxteri	Lithophane thaxteri[5 individuals]
1387	Noctuidae	Noctuinae	Xylenini	Lithophane thujae Webster & Thomas, [2000]	Lithophane thujae	Lithophane thujae[4 individuals]
1388	Noctuidae	Noctuinae	Xylenini	Lithophane unimoda (Lintner, 1878)	Lithophane unimoda	Lithophane unimoda[22 individuals]
1389	Noctuidae	Noctuinae	Xylenini	Mesogona olivata (Harvey, 1874)	Mesogona olivata	Mesogona olivata[6 individuals]
1390	Noctuidae	Noctuinae	Xylenini	Mesogona subcuprea Crabo & Hammond, [1998]	Mesogona subcuprea	Mesogona subcuprea[5 individuals]
1391	Noctuidae	Noctuinae	Xylenini	Metaxaglaea inulta (Grote, 1874)	Metaxaglaea inulta	Metaxaglaea inulta[12 individuals]
1392	Noctuidae	Noctuinae	Xylenini	Mniotype ducta (Grote, 1878)	Mniotype ducta	Mniotype ducta[2 individuals]
1393	Noctuidae	Noctuinae	Xylenini	Mniotype tenera (Smith, 1900)	Mniotype tenera	Mniotype tenera[20 individuals]
1394	Noctuidae	Noctuinae	Xylenini	Parastichtis suspecta (Hübner, [1817])	Parastichtis suspecta	Parastichtis suspecta[23 individuals]
1395	Noctuidae	Noctuinae	Xylenini	Platypolia anceps (Stephens, 1850)	Platypolia anceps	Platypolia anceps[11 individuals]
1396	Noctuidae	Noctuinae	Xylenini	Platypolia contadina (Smith, 1894)	Platypolia contadina	Platypolia contadina[5 individuals]
1397	Noctuidae	Noctuinae	Xylenini	Platypolia loda (Strecker, 1898)	Platypolia loda	Platypolia loda[8 individuals]
1398	Noctuidae	Noctuinae	Xylenini	“Platypolia” mactata (Guenée, 1852)	Platypolia mactata	Platypolia mactata[9 individuals]
1399	Noctuidae	Noctuinae	Xylenini	Psectraglaea carnosa (Grote, 1877)	Psectraglaea carnosa	Psectraglaea carnosa[5 individuals]
1400	Noctuidae	Noctuinae	Xylenini	Pyreferra ceromatica (Grote, 1874)	Pyreferra ceromatica	Pyreferra ceromatica
1401	Noctuidae	Noctuinae	Xylenini	Pyreferra citrombra Franclemont, 1941	Pyreferra citrombra	Pyreferra citrombra[5 individuals]
1402	Noctuidae	Noctuinae	Xylenini	Pyreferra hesperidago (Guenée, 1852)	Pyreferra hesperidago	Pyreferra hesperidago[1 individuals]
1403	Noctuidae	Noctuinae	Xylenini	Pyreferra pettiti (Grote, 1874)	Pyreferra pettiti	Pyreferra pettiti[7 individuals]
1404	Noctuidae	Noctuinae	Xylenini	Rhizagrotis albalis (Grote, 1878)	Rhizagrotis albalis	Rhizagrotis albalis[6 individuals]
1405	Noctuidae	Noctuinae	Xylenini	Rhizagrotis cloanthoides (Grote, 1881)	Rhizagrotis cloanthoides	Rhizagrotis cloanthoides[5 individuals]
1406	Noctuidae	Noctuinae	Xylenini	Rhizagrotis stylata (Smith, 1893)	Rhizagrotis stylata	Rhizagrotis stylata[6 individuals]
1407	Noctuidae	Noctuinae	Xylenini	Sunira bicolorago (Guenée, 1852)	Sunira bicolorago	Sunira bicolorago[85 individuals]
1408	Noctuidae	Noctuinae	Xylenini	Sunira decipiens (Grote, 1881)	Sunira decipiens	Sunira decipiens[10 individuals]
1409	Noctuidae	Noctuinae	Xylenini	Sunira verberata (Smith, 1904)	Sunira verberata	Sunira verberata[13 individuals]
1410	Noctuidae	Noctuinae	Xylenini	Sutyna privata (Walker, 1857)	Sutyna privata	Sutyna privata[28 individuals]
1411	Noctuidae	Noctuinae	Xylenini	Ufeus hulstii Smith, 1908	Ufeus hulstii	Ufeus hulstii[2 individuals]
1412	Noctuidae	Noctuinae	Xylenini	Ufeus plicatus Grote, 1873	Ufeus plicatus	Ufeus plicatus[2 individuals]
1413	Noctuidae	Noctuinae	Xylenini	Ufeus satyricus Grote, 1873	Ufeus satyricus	Ufeus satyricus[15 individuals]
1414	Noctuidae	Noctuinae	Xylenini	Xanthia tatago Lafontaine & Mikkola, 2003	Xanthia tatago	Xanthia tatago[6 individuals]
1415	Noctuidae	Noctuinae	Xylenini	Xylena brucei (Smith, 1892)	Xylena brucei	Xylena brucei[2 individuals]
1416	Noctuidae	Noctuinae	Xylenini	Xylena cineritia (Grote, 1875)	Xylena cineritia	Xylena cineritia[20 individuals]
1417	Noctuidae	Noctuinae	Xylenini	Xylena curvimacula (Morrison, 1874)	Xylena curvimacula	Xylena curvimacula[19 individuals]
1418	Noctuidae	Noctuinae	Xylenini	Xylena nupera (Lintner, 1874)	Xylena nupera	Xylena nupera[4 individuals]
1419	Noctuidae	Noctuinae	Xylenini	Xylena thoracica (Putnam-Cramer, 1886)	Xylena thoracica	Xylena thoracica[24 individuals]
1420	Noctuidae	Noctuinae	Xylenini	Xylotype arcadia Barnes & Benjamin, 1922	Xylotype arcadia	Xylotype arcadia[9 individuals]
1421	Noctuidae	Noctuinae	Xylenini	Zotheca tranquilla Grote, 1874	Zotheca tranquilla	Zotheca tranquilla[11 individuals]
1422	Noctuidae	Noctuinae	Xylenini (incertae sedis)	Fagitana littera (Guenée, 1852)	Fagitana littera	Fagitana littera[1 individuals]
1423	Noctuidae	Noctuinae	Xylenini (incertae sedis)	Properigea albimacula (Barnes & McDunnough, 1912)	Properigea albimacula	Properigea albimacula[10 individuals]
1424	Noctuidae	Noctuinae	Xylenini (incertae sedis)	Properigea costa (Barnes & Benjamin, 1923)	Properigea costa	Properigea costa[3 individuals]
1425	Noctuidae	Noctuinae	Xylenini (incertae sedis)	Properigea niveirena (Harvey, 1876)	Properigea niveirena	Properigea niveirena[1 individuals]
1426	Noctuidae	Noctuinae	Xylenini (incertae sedis)	Pseudanarta crocea (Hy. Edwards, 1875)	Pseudanarta crocea	Pseudanarta crocea[24 individuals]
1427	Noctuidae	Noctuinae	Xylenini (incertae sedis)	Pseudanarta flava (Grote, 1874)	Pseudanarta flava	Pseudanarta flava[2 individuals]
1428	Noctuidae	Noctuinae	Xylenini (incertae sedis)	Pseudobryomima muscosa (Hampson, 1906)	Pseudobryomima muscosa	Pseudobryomima muscosa[2 individuals]
1429	Noctuidae	Oncocnemidinae		Behrensia conchiformis Grote, 1875	Behrensia conchiformis	Behrensia conchiformis[3 individuals]
1430	Noctuidae	Oncocnemidinae		Calophasia lunula (Hufnagel, 1766)	Calophasia lunula	Calophasia lunula[26 individuals]
1431	Noctuidae	Oncocnemidinae		Catabena lineolata Walker, 1865	Catabena lineolata	Catabena lineolata[2 individuals]
1432	Noctuidae	Oncocnemidinae		Pleromelloida bonuscula (Smith, 1898)	Pleromelloida bonuscula	Pleromelloida bonuscula[4 individuals]
1433	Noctuidae	Oncocnemidinae		Pleromelloida cinerea (Smith, 1904)	Pleromelloida cinerea	Pleromelloida cinerea[10 individuals]
1434	Noctuidae	Oncocnemidinae		Pleromelloida conserta (Grote, 1881)	Pleromelloida conserta	Pleromelloida conserta[8 individuals]
1435	Noctuidae	Oncocnemidinae		Pseudacontia crustaria (Morrison, 1875)	Pseudacontia crustaria	Pseudacontia crustaria[1 individuals]
1436	Noctuidae	Oncocnemidinae		Sympistis acheron Troubridge, 2008	Sympistis acheron	Sympistis acheron[1 individuals]
1437	Noctuidae	Oncocnemidinae		Sympistis albifasciata (Hampson, 1906)	Sympistis albifasciata	Sympistis albifasciata[4 individuals]
1438	Noctuidae	Oncocnemidinae		Sympistis amun Troubridge, 2008	Sympistis amun	Sympistis amun[3 individuals]
1439	Noctuidae	Oncocnemidinae		Sympistis anweileri Troubridge & Lafontaine, 2008	Sympistis anweileri	Sympistis anweileri[8 individuals]
1440	Noctuidae	Oncocnemidinae		Sympistis augustus (Harvey, 1875)	Sympistis augustus	Sympistis augustus[2 individuals]
1441	Noctuidae	Oncocnemidinae		Sympistis badistriga (Grote, 1872)	Sympistis badistriga	Sympistis badistriga[3 individuals]
1442	Noctuidae	Oncocnemidinae		Sympistis balteata (Smith, 1902)	Sympistis balteata	Sympistis balteata[5 individuals]
1443	Noctuidae	Oncocnemidinae		Sympistis barnesii (Smith, 1899)	Sympistis barnesii	Sympistis barnesii[2 individuals]
1444	Noctuidae	Oncocnemidinae		Sympistis californiae (McDunnough, 1946)	Sympistis californiae	Sympistis californiae[1 individuals]
1445	Noctuidae	Oncocnemidinae		Sympistis chalybdis (Troubridge & Crabo, 1999)	Sympistis chalybdis	Sympistis chalybdis[2 individuals]
1446	Noctuidae	Oncocnemidinae		Sympistis chionanthi (J.E. Smith, 1797)	Sympistis chionanthi	Sympistis chionanthi[8 individuals]
1447	Noctuidae	Oncocnemidinae		Sympistis chons Troubridge, 2008	Sympistis chons	Sympistis chons[32 individuals]
1448	Noctuidae	Oncocnemidinae		Sympistis cibalis (Grote, 1880)	Sympistis cibalis	Sympistis cibalis[9 individuals]
1449	Noctuidae	Oncocnemidinae		Sympistis cocytus Troubridge, 2008	Sympistis cocytus	Sympistis cocytus[7 individuals]
1450	Noctuidae	Oncocnemidinae		Sympistis columbia (McDunnough, 1922)	Sympistis columbia	Sympistis columbia[2 individuals]
1451	Noctuidae	Oncocnemidinae		Sympistis coprocolor (Troubridge & Crabo, (1999))	Sympistis coprocolor	Sympistis coprocolor[2 individuals]
1452	Noctuidae	Oncocnemidinae		Sympistis dentata (Grote, 1875)	Sympistis dentata	Sympistis dentata[20 individuals]
1453	Noctuidae	Oncocnemidinae		Sympistis dinalda (Smith, 1908)	Sympistis dinalda	Sympistis dinalda[16 individuals]
1454	Noctuidae	Oncocnemidinae		Sympistis dunbari (Harvey, 1876)	Sympistis dunbari	Sympistis dunbari[6 individuals]
1455	Noctuidae	Oncocnemidinae		Sympistis extremis (Smith, 1890)	Sympistis extremis	Sympistis extremis[4 individuals]
1456	Noctuidae	Oncocnemidinae		Sympistis fifia (Dyar, 1904)	Sympistis fifia	Sympistis fifia[8 individuals]
1457	Noctuidae	Oncocnemidinae		Sympistis figurata (Harvey, 1875)	Sympistis figurata	Sympistis figurata[2 individuals]
1458	Noctuidae	Oncocnemidinae		Sympistis funebris (Hübner, [1809])	Sympistis funebris	Sympistis funebris[5 individuals]
1459	Noctuidae	Oncocnemidinae		Sympistis glennyi (Grote, 1873)	Sympistis glennyi	Sympistis glennyi[8 individuals]
1460	Noctuidae	Oncocnemidinae		Sympistis greyi (Troubridge & Crabo, (1999))	Sympistis greyi	Sympistis greyi[26 individuals]
1461	Noctuidae	Oncocnemidinae		Sympistis heliophila (Paykull, 1793)	Sympistis heliophila	Sympistis heliophila[5 individuals]
1462	Noctuidae	Oncocnemidinae		Sympistis insanina Troubridge, 2008	Sympistis insanina	Sympistis insanina[3 individuals]
1463	Noctuidae	Oncocnemidinae		Sympistis iricolor (Smith, 1888)	Sympistis iricolor	Sympistis iricolor[4 individuals]
1464	Noctuidae	Oncocnemidinae		Sympistis lacticollis (Smith, 1908)	Sympistis lacticollis	Sympistis lacticollis[2 individuals]
1465	Noctuidae	Oncocnemidinae		Sympistis lapponica (Thunberg, 1791)	Sympistis lapponica	Sympistis lapponica[5 individuals]
1466	Noctuidae	Oncocnemidinae		Sympistis lepipoloides (McDunnough, 1922)	Sympistis lepipoloides	Sympistis lepipoloides[3 individuals]
1467	Noctuidae	Oncocnemidinae		Sympistis levis (Grote, 1880)	Sympistis levis	Sympistis levis[1 individuals]
1468	Noctuidae	Oncocnemidinae		Sympistis mackiei (Barnes & Benjamin, 1924)	Sympistis mackiei	Sympistis mackiei[3 individuals]
1469	Noctuidae	Oncocnemidinae		Sympistis occata (Grote, 1875)	Sympistis occata	Sympistis occata[1 individuals]
1470	Noctuidae	Oncocnemidinae		Sympistis pallidior (Barnes, 1928)	Sympistis pallidior	Sympistis pallidior[4 individuals]
1471	Noctuidae	Oncocnemidinae		Sympistis parvanigra (Blackmore, 1923)	Sympistis parvanigra	Sympistis parvanigra[5 individuals]
1472	Noctuidae	Oncocnemidinae		Sympistis piffardi (Walker, 1862)	Sympistis piffardi	Sympistis piffardi[5 individuals]
1473	Noctuidae	Oncocnemidinae		Sympistis poliochroa (Hampson, 1906)	Sympistis poliochroa	Sympistis poliochroa[4 individuals]
1474	Noctuidae	Oncocnemidinae		Sympistis pudorata (Smith, 1893)	Sympistis pudorata	Sympistis pudorata[4 individuals]
1475	Noctuidae	Oncocnemidinae		Sympistis regina (Smith, 1902)	Sympistis regina	Sympistis regina[2 individuals]
1476	Noctuidae	Oncocnemidinae		Sympistis riparia (Morrison, 1875)	Sympistis riparia	Sympistis riparia[8 individuals]
1477	Noctuidae	Oncocnemidinae		Sympistis sandaraca (Buckett & Bauer, 1967)	Sympistis sandaraca	Sympistis sandaraca[1 individuals]
1478	Noctuidae	Oncocnemidinae		Sympistis sanina (Smith, 1910)	Sympistis sanina	Sympistis sanina[14 individuals]
1479	Noctuidae	Oncocnemidinae		Sympistis saundersiana (Grote, 1876)	Sympistis saundersiana	Sympistis saundersiana[4 individuals]
1480	Noctuidae	Oncocnemidinae		Sympistis semicollaris (Smith, 1909)	Sympistis semicollaris	Sympistis semicollaris[24 individuals]
1481	Noctuidae	Oncocnemidinae		Sympistis stabilis (Smith, 1895)	Sympistis stabilis	Sympistis stabilis[4 individuals]
1482	Noctuidae	Oncocnemidinae		Sympistis tenuifascia (Smith, 1888)	Sympistis tenuifascia	Sympistis tenuifascia[9 individuals]
1483	Noctuidae	Oncocnemidinae		Sympistis umbrifascia (Smith, 1894)	Sympistis umbrifascia	Sympistis umbrifascia[1 individuals]
1484	Noctuidae	Oncocnemidinae		Sympistis viriditincta (Smith, 1894)	Sympistis viriditincta	Sympistis viriditincta[4 individuals]
1485	Noctuidae	Oncocnemidinae		Sympistis wilsoni Barnes & Benjamin, 1924	Sympistis wilsoni	Sympistis wilsoni[2 individuals]
1486	Noctuidae	Oncocnemidinae		Sympistis youngi (McDunnough, 1922)	Sympistis youngi	Sympistis youngi[4 individuals]
1487	Noctuidae	Oncocnemidinae		Sympistis zetterstedtii (Staudinger, 1857)	Sympistis zetterstedtii	Sympistis zetterstedtii[51 individuals]
1488	Noctuidae	Pantheinae		Charadra deridens (Guenée, 1852)	Charadra deridens	Charadra deridens[17 individuals]
1489	Noctuidae	Pantheinae		Colocasia flavicornis (Smith, 1884)	Colocasia flavicornis	Colocasia flavicornis[10 individuals]
1490	Noctuidae	Pantheinae		Colocasia propinquilinea (Grote, 1873)	Colocasia propinquilinea	Colocasia propinquilinea[25 individuals]
1491	Noctuidae	Pantheinae		Panthea acronyctoides (Walker, 1861)	Panthea acronyctoides	Panthea acronyctoides[54 individuals]
1492	Noctuidae	Pantheinae		Panthea furcilla (Packard, 1864)	Panthea furcilla	Panthea furcilla[48 individuals]
1493	Noctuidae	Pantheinae		Panthea gigantea (French, 1890)	Panthea gigantea	Panthea gigantea[2 individuals]
1494	Noctuidae	Pantheinae		Panthea virginarius (Grote, 1880)	Panthea virginarius	Panthea virginarius[126 individuals]
1495	Noctuidae	Plusiinae	Abrostolini	Abrostola ovalis Guenée, 1852	Abrostola ovalis	Abrostola ovalis[1 individuals]
1496	Noctuidae	Plusiinae	Abrostolini	Abrostola urentis Guenée, 1852	Abrostola urentis	Abrostola urentis[10 individuals]
1497	Noctuidae	Plusiinae	Argyrogrammatini	Argyrogramma verruca (Fabricius, 1794)	Argyrogramma verruca	Argyrogramma verruca[4 individuals]
1498	Noctuidae	Plusiinae	Argyrogrammatini	Chrysodeixis chalcites (Esper, 1789)	Chrysodeixis chalcites	Chrysodeixis chalcites[8 individuals]
1499	Noctuidae	Plusiinae	Argyrogrammatini	Chrysodeixis includens (Walker, [1858])	Chrysodeixis includens	Chrysodeixis includens[21 individuals]
1500	Noctuidae	Plusiinae	Argyrogrammatini	Ctenoplusia oxygramma (Geyer, 1832)	Ctenoplusia oxygramma	Ctenoplusia oxygramma[2 individuals]
1501	Noctuidae	Plusiinae	Argyrogrammatini	Trichoplusia ni (Hübner, [1803])	Trichoplusia ni	Trichoplusia ni[8 individuals]
1502	Noctuidae	Plusiinae	Plusiini	Allagrapha aerea (Hübner, [1803])	Allagrapha aerea	Allagrapha aerea[23 individuals]
1503	Noctuidae	Plusiinae	Plusiini	Anagrapha falcifera (Kirby, 1837)	Anagrapha falcifera	Anagrapha falcifera[56 individuals]
1504	Noctuidae	Plusiinae	Plusiini	Autographa ampla (Walker, [1858])	Autographa ampla	Autographa ampla[45 individuals]
1505	Noctuidae	Plusiinae	Plusiini	Autographa bimaculata (Stephens, 1830)	Autographa bimaculata	Autographa bimaculata[13 individuals]
1506	Noctuidae	Plusiinae	Plusiini	Autographa buraetica (Staudinger, 1892)	Autographa buraetica	Autographa buraetica[1 individuals]
1507	Noctuidae	Plusiinae	Plusiini	Autographa californica (Speyer, 1875)	Autographa californica	Autographa californica[15 individuals]
1508	Noctuidae	Plusiinae	Plusiini	Autographa corusca (Strecker, 1885)	Autographa corusca	Autographa corusca[15 individuals]
1509	Noctuidae	Plusiinae	Plusiini	Autographa flagellum (Walker, [1858])	Autographa flagellum	Autographa flagellum[13 individuals]
1510	Noctuidae	Plusiinae	Plusiini	Autographa mappa (Grote & Robinson, 1868)	Autographa mappa	Autographa mappa[33 individuals]
1511	Noctuidae	Plusiinae	Plusiini	Autographa metallica (Grote, 1875)	Autographa metallica	Autographa metallica[9 individuals]
1512	Noctuidae	Plusiinae	Plusiini	Autographa precationis (Guenée, 1852)	Autographa precationis	Autographa precationis[89 individuals]
1513	Noctuidae	Plusiinae	Plusiini	Autographa pseudogamma (Grote, 1875)	Autographa pseudogamma	Autographa pseudogamma[6 individuals]
1514	Noctuidae	Plusiinae	Plusiini	Autographa rubidus Ottolengui, 1902	Autographa rubidus	Autographa rubidus[10 individuals]
1515	Noctuidae	Plusiinae	Plusiini	Autographa sansoni Dod, 1910	Autographa sansoni	Autographa sansoni[16 individuals]
1516	Noctuidae	Plusiinae	Plusiini	Autographa speciosa Ottolengui, 1902	Autographa speciosa	Autographa speciosa[4 individuals]
1517	Noctuidae	Plusiinae	Plusiini	Autographa v-alba Ottolengui, 1902	Autographa v-alba	Autographa v-alba[2 individuals]
1518	Noctuidae	Plusiinae	Plusiini	Chrysanympha formosa (Grote, 1865)	Chrysanympha formosa	Chrysanympha formosa[15 individuals]
1519	Noctuidae	Plusiinae	Plusiini	Diachrysia aereoides (Grote, 1864)	Diachrysia aereoides	Diachrysia aereoides[23 individuals]
1520	Noctuidae	Plusiinae	Plusiini	Diachrysia balluca (Geyer, 1832)	Diachrysia balluca	Diachrysia balluca[8 individuals]
1521	Noctuidae	Plusiinae	Plusiini	Eosphoropteryx thyatyroides (Guenée, 1852)	Eosphoropteryx thyatyroides	Eosphoropteryx thyatyroides[7 individuals]
1522	Noctuidae	Plusiinae	Plusiini	Euchalcia borealis Lafontaine & Poole, 1991	Euchalcia borealis	Euchalcia borealis[1 individuals]
1523	Noctuidae	Plusiinae	Plusiini	Exyra fax (Grote, 1873)	Exyra fax	Exyra fax[3 individuals]
1524	Noctuidae	Plusiinae	Plusiini	Megalographa biloba (Stephens, 1830)	Megalographa biloba	Megalographa biloba[2 individuals]
1525	Noctuidae	Plusiinae	Plusiini	Plusia contexta Grote, 1873	Plusia contexta	Plusia contexta[12 individuals]
1526	Noctuidae	Plusiinae	Plusiini	Plusia magnimacula D. & L. Handfield, 2006	Plusia magnimacula	Plusia magnimacula[27 individuals]
1527	Noctuidae	Plusiinae	Plusiini	Plusia nichollae (Hampson, 1913)	Plusia nichollae	Plusia nichollae[8 individuals]
1528	Noctuidae	Plusiinae	Plusiini	Plusia putnami Grote, 1873	Plusia putnami	Plusia putnami[37 individuals]
1529	Noctuidae	Plusiinae	Plusiini	Plusia venusta Walker, 1865	Plusia venusta	Plusia venusta[6 individuals]
1530	Noctuidae	Plusiinae	Plusiini	Polychrysia esmeralda (Oberthür, 1880)	Polychrysia esmeralda	Polychrysia esmeralda[2 individuals]
1531	Noctuidae	Plusiinae	Plusiini	Pseudeva palligera (Grote, 1881)	Pseudeva palligera	Pseudeva palligera[7 individuals]
1532	Noctuidae	Plusiinae	Plusiini	Pseudeva purpurigera (Walker, 1858)	Pseudeva purpurigera	Pseudeva purpurigera[6 individuals]
1533	Noctuidae	Plusiinae	Plusiini	Rachiplusia ou (Guenée, 1852)	Rachiplusia ou	Rachiplusia ou[2 individuals]
1534	Noctuidae	Plusiinae	Plusiini	Syngrapha abstrusa Eichlin & Cunningham, 1978	Syngrapha abstrusa	Syngrapha abstrusa[24 individuals]
1535	Noctuidae	Plusiinae	Plusiini	Syngrapha alias (Ottolengui, 1902)	Syngrapha alias	Syngrapha alias[13 individuals]
1536	Noctuidae	Plusiinae	Plusiini	Syngrapha altera (Ottolengui, 1902)	Syngrapha altera	Syngrapha altera[22 individuals]
1537	Noctuidae	Plusiinae	Plusiini	Syngrapha alticola (Walker, [1858])	Syngrapha alticola	Syngrapha alticola[4 individuals]
1538	Noctuidae	Plusiinae	Plusiini	Syngrapha angulidens (Smith, 1891)	Syngrapha angulidens	Syngrapha angulidens[56 individuals]
1539	Noctuidae	Plusiinae	Plusiini	Syngrapha borea (Aurivillius, 1890)	Syngrapha borea	Syngrapha borea[5 individuals]
1540	Noctuidae	Plusiinae	Plusiini	Syngrapha celsa (Hy. Edwards, 1881)	Syngrapha celsa	Syngrapha celsa[25 individuals]
1541	Noctuidae	Plusiinae	Plusiini	Syngrapha cryptica Eichlin & Cunningham, 1978	Syngrapha cryptica	Syngrapha cryptica[8 individuals]
1542	Noctuidae	Plusiinae	Plusiini	Syngrapha diasema (Boisduval, 1828)	Syngrapha diasema	Syngrapha diasema[56 individuals]
1543	Noctuidae	Plusiinae	Plusiini	Syngrapha epigaea (Grote, 1875)	Syngrapha epigaea	Syngrapha epigaea[14 individuals]
1544	Noctuidae	Plusiinae	Plusiini	Syngrapha ignea (Grote, 1863)	Syngrapha ignea	Syngrapha ignea[5 individuals]
1545	Noctuidae	Plusiinae	Plusiini	Syngrapha interrogationis (Linnaeus, 1758)	Syngrapha interrogationis	Syngrapha interrogationis[8 individuals]
1546	Noctuidae	Plusiinae	Plusiini	Syngrapha microgamma (Hübner, 1823)	Syngrapha microgamma	Syngrapha microgamma[8 individuals]
1547	Noctuidae	Plusiinae	Plusiini	Syngrapha montana (Packard, 1869)	Syngrapha montana	Syngrapha montana[4 individuals]
1548	Noctuidae	Plusiinae	Plusiini	Syngrapha octoscripta (Grote, 1874)	Syngrapha octoscripta	Syngrapha octoscripta[97 individuals]
1549	Noctuidae	Plusiinae	Plusiini	Syngrapha orophila (Hampson, 1908)	Syngrapha orophila	Syngrapha orophila[10 individuals]
1550	Noctuidae	Plusiinae	Plusiini	Syngrapha parilis (Hübner, [1809])	Syngrapha parilis	Syngrapha parilis[3 individuals]
1551	Noctuidae	Plusiinae	Plusiini	Syngrapha rectangula (Kirby, 1837)	Syngrapha rectangula	Syngrapha rectangula[38 individuals]
1552	Noctuidae	Plusiinae	Plusiini	Syngrapha selecta (Walker, [1858])	Syngrapha selecta	Syngrapha selecta[8 individuals]
1553	Noctuidae	Plusiinae	Plusiini	Syngrapha surena (Grote, 1882)	Syngrapha surena	Syngrapha surena[5 individuals]
1554	Noctuidae	Plusiinae	Plusiini	Syngrapha u-aureum (Guenée, 1852)	Syngrapha u-aureum	Syngrapha u-aureum[12 individuals]
1555	Noctuidae	Plusiinae	Plusiini	Syngrapha viridisigma (Grote, 1874)	Syngrapha viridisigma	Syngrapha viridisigma[56 individuals]
