# Supplementary material for: A Transcontinental Challenge — A Test of DNA Barcode Performance for 1,541 Species of Canadian Noctuoidea (Lepidoptera)
Source: PLoS One. 2014 Mar 25;9(3):e92797. doi: 10.1371/journal.pone.0092797 (PMC3965468; doi:10.1371/journal.pone.0092797)
Supplement: Table S2 — Fifty-seven assemblages of Canadian noctuoids where two or more species share their barcode sequence(s). (XLS) [file pone.0092797.s002.xls]

## Sheet: SI2
Table SI2
Family	Subfamily	Species	# species sharing barcodes
Erebidae	Herminiinae	Idia denticulalis	2
		I. lubricalis
		Zanclognatha marcidilinea	2
		Z. protumnusalis
	Lymantriinae	Dasychira grisefacta	2
	Lymantriinae	D. pinicola
	Erebinae	Catocala antinympha	2
		C. badia
		Catocala lacrymosa	3
		C. palaeogama
		C. dejecta
		Catocala retecta	9
		C. judith
		C. robinsonii
		C. obscura
		C. habilis
		C. cara
		C. vidua
		C. flebilis
		C. residua
		Catocala insolabilis	2
		C. dejecta
		Catocala faustina	9
		C. meskei
		C. parta
		C. luciana
		C. briseis
		C. semirelicta
		C. hermia
		C. grotiana
		C. californica
	Arctiinae	Arctia brachyptera	3
		A. caja
		A. opulenta
		Dodia albertae	2
		D. verticalis
		Grammia blakei	9
		G. elongata
		G. figurata
		G. franconia
		G. margo
		G. parthenice
		G. quenseli
		G. virguncula
		G. williamsii
		Grammia quenseli	2
		G. yukona
		Grammia elongata	3
		G. ornata
		G. williamsii
		Haploa clymene	4
		H. confusa
		H. lecontei
		H. reversa
		Pararctia lapponica	2
		P. yarrowii
		Spilosoma danbyi	3
		S. pteridis
		S. vagans
		Virbia ferruginosa	2
		V. lamae
Noctuidae	Plusiinae	Syngrapha abstrusa	4
		S. alias
		S. cryptica
		S. rectangula
	Agaristinae	Alypia langtoni	2
		A. octomaculata
	Pantheinae	Panthea acronyctoides	3
	Pantheinae	P. furcilla
	Pantheinae	P. virginarius
	Acronictinae	Acronicta cyanescens	2
		A. lepusculina
		Agriopodes fallax	2
		A. geminata
	Oncocnemidinae	Sympistis heliophila	2
		S. wilsoni
	Noctuinae	Abagrotis glenni	2
		A. mirabilis
		Abagrotis brunneipennis	4
		A. cupida
		A. discoidalis
		A. nefascia
		Abagrotis dickeli	2
		A. turbulenta
		Agrotis vancouverensis	2
		A. volubilis
		Amphipoea americana	2
		A. interoceanica
		Apamea centralis	2
		A. commoda
		Bellura gortynoides	2
		B. vulnifica
		Copablepharon absidum	2
		C. fuscum
		Dargida diffusa	2
		D. terrapictalis
		Eremobina claudens	2
		E. leucoscelis
		Epidemas cinerea	2
		E. obscurus
		Eupsilia morrisoni	2
		E. vinulenta
		Euxoa cicatricosa	2
		E. detersa
		Euxoa biformata	4
		E. intermontana
		E. mimallonis
		E. shasta
		Euxoa divergens	2
		E. sinelinea
		Euxoa manitobana	4
		E. perolivalis
		E. ridingsiana	3
		E. taura
		Euxoa apopsis	2
		E. macleani	3
		Euxoa castanea	3
		E. furtivus
		E. idahoensis
		Ipimorpha nanaimo	3
		I. pleonectusa
		I. viridipallida
		Lasionycta anthracina	5
		L. coracina
		L. flanda
		L. frigida
		L. leucocycla
		Lasionycta skraelingia	2
		L. taigata
		Lithophane bethunei	5
		L. disposita
		L. innominata
		L. patefacta
		L. petulca
		Hyppa contrasta	2
		H. potamus
		Mythimna oxygala	2
		M. yukonensis
		Papaipema birdi	2
		P. insulidens
		Polia nugatis	2
		P. purpurissata
		Resapamea passer	2
		R. venosa
		Rhyacia clemens	2
		R. quadrangula
		Sunira bicolorago	2
		S. decipiens
		Trichordestra dodii	2
		T. legitima
		Xestia inuitica	3
		X. scropulana
		X. wockei
		Xestia alaskae	2
		X. thula
		Xestia finatimis	4
		X. infimatis
		X. vernilis
		X. verniloides
		Xestia badicollis	3
		X. dilucida
		X. praevia
2	10	158	162
